# Supplementary material
Source: publisher figshare collection journal article supplement (https://acs.figshare.com/ndownloader/files/4104637)
Supplement: Supplementary file 1 [file 4104637]

#==============================================================================
data_global
#==============================================================================

_publ_contact_author               'Simon Aldridge'
_publ_contact_author_email          Simon.aldridge@chem.ox.ac.uk

loop_
_publ_author_name
_publ_author_address
 'Phillips, Nicholas'
;    
Inorganic Chemistry Laboratory,
University of Oxford,
Mansfield Road, 
Oxford OX1 3QR. UK.
;
 'Rowles, Johnny'
;    
Inorganic Chemistry Laboratory,
University of Oxford,
Mansfield Road, 
Oxford OX1 3QR. UK.
;
'Kelly, Michael'
;    
Inorganic Chemistry Laboratory,
University of Oxford,
Mansfield Road, 
Oxford OX1 3QR. UK.
; 
'Riddlestone, Ian'
;    
Inorganic Chemistry Laboratory,
University of Oxford,
Mansfield Road, 
Oxford OX1 3QR. UK.
;
 'Rees, Nicholas'
;    
Inorganic Chemistry Laboratory,
University of Oxford,
Mansfield Road, 
Oxford OX1 3QR. UK.
;
 'Dervisi, Athanasia'
;    
School of Chemistry,
Main Building,
Park Place,
Cardiff CF10 3AT. UK.
;
 'Fallis, Ian A.'
;    
School of Chemistry,
Main Building,
Park Place,
Cardiff CF10 3AT. UK
;
 'Aldridge, Simon'
;    
Inorganic Chemistry Laboratory,
University of Oxford,
Mansfield Road, 
Oxford OX1 3QR. UK.
;

_journal_name_full                 
 'Journal of the American Chemical Society'
_journal_volume                    '?'
_journal_page_first                '?'
_journal_page_last                 '?'
_journal_year                      '2012'
_ccdc_journal_depnumber            '?'

_publ_section_title
;
Sterically Encumbered Iridium Bis(N-heterocyclic carbene) Complexes: Air Stable 
14-electron Cations and Facile Degenerate C-H Activation 
;

_publ_section_abstract
;  
Cationic Ir(III) systems supported by bis(expanded NHC) ligand sets and 
featuring agostic C-H and cis alkyl/hydride substituents can be synthesized by 
protonation of the corresponding bis(alkyl) hydride complexes. These systems 
demonstrate reversible activation of a sigma type ligand (i.e. the agostic CH 
bond), undergoing degenerate fluxional exchange at and below room temperature. 
A non-dissociative mechanism is implied by activation parameters 
?H? = 8.8(0.4) kcal mol 1 and ?S? =  12.2(1.7) eu.
;

#==============================================================================
data_1a 
#==============================================================================
_audit_creation_date        "12-08-22"
_audit_creation_method CRYSTALS_ver_14.23

_oxford_structure_analysis_title  '026np11'
_chemical_name_systematic         .
_chemical_melting_point           .


_cell_length_a                    33.2496(3)
_cell_length_b                    20.4868(2)
_cell_length_c                    19.4945(2)
_cell_angle_alpha                 90
_cell_angle_beta                  121.4724(5)
_cell_angle_gamma                 90
_cell_volume                      11325.7(2)
 
_symmetry_cell_setting            'monoclinic' 
_symmetry_space_group_name_H-M    'C 2/c ' 
_symmetry_space_group_name_Hall   '-C 2yc'
loop_
 _symmetry_equiv_pos_as_xyz
 'x,y,z'
 '-x,-y,-z'
 'x+1/2,y+1/2,z'
 '-x+1/2,-y+1/2,-z'
 'x,-y,z+1/2'
 '-x,y,-z+1/2'
 'x+1/2,-y+1/2,z+1/2'
 '-x+1/2,y+1/2,-z+1/2'

loop_
_atom_type_symbol
_atom_type_scat_dispersion_real
_atom_type_scat_dispersion_imag
_atom_type_scat_Cromer_Mann_a1
_atom_type_scat_Cromer_Mann_b1
_atom_type_scat_Cromer_Mann_a2
_atom_type_scat_Cromer_Mann_b2
_atom_type_scat_Cromer_Mann_a3
_atom_type_scat_Cromer_Mann_b3
_atom_type_scat_Cromer_Mann_a4
_atom_type_scat_Cromer_Mann_b4
_atom_type_scat_Cromer_Mann_c
_atom_type_scat_source  
 C       0.0033   0.0016   2.3100  20.8439   1.0200  10.2075   1.5886   0.5687
   0.8650  51.6512   0.2156 'International Tables Vol C 4.2.6.8 and 6.1.1.4'
 H       0.0000   0.0000   0.4930  10.5109   0.3229  26.1257   0.1402   3.1424
   0.0408  57.7998   0.0030 'International Tables Vol C 4.2.6.8 and 6.1.1.4'
 Ir     -1.4442   7.9887  27.3049   1.5928  16.7296   8.8655  15.6115   0.4179
   5.8338  45.0011  11.4722 'International Tables Vol C 4.2.6.8 and 6.1.1.4'
 N       0.0061   0.0033  12.2126   0.0057   3.1322   9.8933   2.0125  28.9975
   1.1663   0.5826 -11.5290 'International Tables Vol C 4.2.6.8 and 6.1.1.4'
 
 
_cell_formula_units_Z                    12

# Given Formula = C44 H55 Ir1 N4 
# Dc =      1.46 Fooo =   5088.00 Mu =     35.73 M =   1248.25
# Found Formula = C44 H55 Ir1 N4 
# Dc =      1.46 FOOO =   5088.00 Mu =     35.73 M =   1248.25

_chemical_formula_sum             'C44 H55 Ir1 N4'
_chemical_formula_moiety          'C44 H55 Ir1 N4'
_chemical_compound_source                .
_chemical_formula_weight            832.17
 
 
_cell_measurement_reflns_used        12865
_cell_measurement_theta_min              5
_cell_measurement_theta_max             27
_cell_measurement_temperature          150
 
_exptl_crystal_description        'block' 
_exptl_crystal_colour             'red' 
_exptl_crystal_size_min           0.100 
_exptl_crystal_size_mid           0.160 
_exptl_crystal_size_max           0.180 
 
_exptl_crystal_density_diffrn     1.464 
_exptl_crystal_density_meas       . 
_exptl_crystal_density_method     'not measured' 
# Non-dispersive F(000): 
_exptl_crystal_F_000              5088.002 
_exptl_absorpt_coefficient_mu     3.573 
 
# Sheldrick geometric approximatio 0.56 0.70 
_exptl_absorpt_correction_type    multi-scan 
_exptl_absorpt_process_details    'DENZO/SCALEPACK (Otwinowski & Minor, 1997)' 
_exptl_absorpt_correction_T_min   0.59 
_exptl_absorpt_correction_T_max   0.70 
# For a Kappa CCD, set Tmin to 1.0 and 
# Tmax to the ratio of max:min frame scales in scale_all.log 
_diffrn_measurement_device_type   'Nonius KappaCCD' 
_diffrn_measurement_device        'Area' 
_diffrn_radiation_monochromator   'graphite' 
_diffrn_radiation_type            'Mo K\a'
_diffrn_radiation_wavelength           0.71073
_diffrn_measurement_method        \w 
 
# If a reference occurs more than once, delete the author 
# and date from subsequent references. 
_computing_data_collection        'COLLECT (Nonius, 2001).' 
_computing_cell_refinement        'DENZO/SCALEPACK (Otwinowski & Minor, 1997)' 
_computing_data_reduction         'DENZO/SCALEPACK (Otwinowski & Minor, 1997)' 
_computing_structure_solution     'Superflip (Palatinus & Chapuis, 2007)' 
_computing_structure_refinement   'CRYSTALS (Betteridge et al., 2003)' 
_computing_publication_material   'CRYSTALS (Betteridge et al., 2003)' 
_computing_molecular_graphics     'CAMERON (Watkin et al., 1996)' 
 
_diffrn_standards_interval_time   . 
_diffrn_standards_interval_count  . 
_diffrn_standards_number          0 
_diffrn_standards_decay_%         .
 
_diffrn_ambient_temperature        150
_diffrn_reflns_number             56613 
_reflns_number_total              12909 
_diffrn_reflns_av_R_equivalents   0.044 
# Number of reflections without Friedels Law is 24485 
# Number of reflections with Friedels Law is 12909 
# Theoretical number of reflections is about 13005 
 
 
_diffrn_reflns_theta_min          5.130 
_diffrn_reflns_theta_max          27.496 
_diffrn_measured_fraction_theta_max 0.992 
 
_diffrn_reflns_theta_full         26.671 
_diffrn_measured_fraction_theta_full 0.992 
 
 
_diffrn_reflns_limit_h_min        -43 
_diffrn_reflns_limit_h_max        43 
_diffrn_reflns_limit_k_min        -26 
_diffrn_reflns_limit_k_max        25 
_diffrn_reflns_limit_l_min        -25 
_diffrn_reflns_limit_l_max        25 
_reflns_limit_h_min               -43 
_reflns_limit_h_max               36 
_reflns_limit_k_min               0 
_reflns_limit_k_max               26 
_reflns_limit_l_min               0 
_reflns_limit_l_max               25 
 
_oxford_diffrn_Wilson_B_factor    2.06 
_oxford_diffrn_Wilson_scale       334.08 
 
_atom_sites_solution_primary      Other  #heavy,direct,difmap,geom
# _atom_sites_solution_secondary  difmap
_atom_sites_solution_hydrogens    difmap
 
_refine_diff_density_min          -1.81 
_refine_diff_density_max          3.55 
 
 
# The current dictionary definitions do not cover the 
# situation where the reflections used for refinement were 
# selected by a user-defined sigma threshold 
 
 
# The values actually used during refinement 
_oxford_reflns_threshold_expression_ref     I>-3.0\s(I)
_refine_ls_number_reflns          12909 
_refine_ls_number_restraints      144 
_refine_ls_number_parameters      693 
_oxford_refine_ls_R_factor_ref    0.0760 
_refine_ls_wR_factor_ref          0.0984 
_refine_ls_goodness_of_fit_ref    0.9509 
_refine_ls_shift/su_max           0.0069999 
_refine_ls_shift/su_mean          0.0001757 
 
 
# The values computed from all data 
_oxford_reflns_number_all         12909 
_refine_ls_R_factor_all           0.0760 
_refine_ls_wR_factor_all          0.0984 
 
# The values computed with a 2 sigma cutoff - a la SHELX 
_reflns_threshold_expression      I>2.0\s(I)
_reflns_number_gt                 10101 
_refine_ls_R_factor_gt            0.0539 
_refine_ls_wR_factor_gt           0.0869 
 
# choose from: rm (reference molecule of known chirality), 
# ad (anomolous dispersion - Flack), rmad (rm and ad), 
# syn (from synthesis), unk (unknown) or . (not applicable). 
_chemical_absolute_configuration  '.' 
 
 
_refine_ls_structure_factor_coef  Fsqd 
_refine_ls_matrix_type            full
_refine_ls_hydrogen_treatment     constr         # none, undef, noref, refall,
                                                 # refxyz, refU, constr or mixed
_refine_ls_weighting_scheme       calc 
_refine_ls_weighting_details 
;
 Method, part 1, Chebychev polynomial, (Watkin, 1994, Prince, 1982) 
 [weight] = 1.0/[A~0~*T~0~(x)+A~1~*T~1~(x) ... +A~n-1~]*T~n-1~(x)] 
 where A~i~ are the Chebychev coefficients listed below and x= Fcalc/Fmax 
 Method = Robust Weighting (Prince, 1982) 
 W = [weight] * [1-(deltaF/6*sigmaF)^2^]^2^ 
 A~i~ are: 
 3.24 3.15 0.816 
;
# Insert your own references if required - in alphabetical order 
_publ_section_references 
; 
Nonius (2001). COLLECT. Nonius BV, Delft, The Netherlands. 
 
Otwinowski, Z. & Minor, W. (1997). Methods in Enzymology, Vol. 276, 
edited by C. W. Carter Jr & R. M. Sweet, pp. 307--326. 
New York: Academic Press. 
 
Betteridge, P.W., Carruthers, J.R., Cooper, R.I., 
Prout, K. & Watkin, D.J. (2003). J. Appl. Cryst. 36, 1487. 
 
Watkin, D.J., Prout, C.K. & Pearce, L.J. (1996). CAMERON, Chemical 
Crystallography Laboratory, Oxford, UK. 
 
Palatinus, L. & Chapuis, G. (2007). J. Appl. Cryst. 40, 786-790. 
 
Watkin D.J. (1994). 
Acta Cryst, A50, 411-437. 
 
Prince, E. 
Mathematical Techniques in Crystallography 
and Materials Science 
Springer-Verlag, New York, 1982. 
; 

# Uequiv = arithmetic mean of Ui i.e. Ueqiv = (U1+U2+U3)/3

# Replace last . with number of unfound hydrogen atoms attached to an atom.

# ..._refinement_flags_... 
# . no refinement constraints           S special position constraint on site
# G rigid group refinement of site      R riding atom
# D distance or angle restraint on site T thermal displacement constraints
# U Uiso or Uij restraint (rigid bond)  P partial occupancy constraint


loop_
_atom_site_label
_atom_site_type_symbol
_atom_site_fract_x
_atom_site_fract_y
_atom_site_fract_z
_atom_site_U_iso_or_equiv
_atom_site_occupancy
_atom_site_adp_type
_atom_site_refinement_flags_posn
_atom_site_refinement_flags_adp
_atom_site_refinement_flags_occupancy
_atom_site_disorder_assembly
_atom_site_disorder_group
_atom_site_attached_hydrogens
Ir1 Ir 0.500000(7) 0.978856(18) 0.750000(7) 0.0231 1.0000 Uani S T . . . . 
C2 C 0.5346(3) 0.9631(4) 0.6839(4) 0.0344 1.0000 Uani . . . . . . 
C3 C 0.5438(3) 0.8944(4) 0.7083(4) 0.0340 1.0000 Uani . . . . . . 
C4 C 0.5207(3) 0.8426(4) 0.6535(5) 0.0415 1.0000 Uani . . . . . . 
C5 C 0.5268(3) 0.7776(5) 0.6763(5) 0.0483 1.0000 Uani . . . . . . 
C6 C 0.5024(4) 0.7235(5) 0.6158(6) 0.0645 1.0000 Uani . . . . . . 
C7 C 0.5565(3) 0.7631(4) 0.7571(5) 0.0464 1.0000 Uani . . . . . . 
C8 C 0.5792(3) 0.8120(4) 0.8155(4) 0.0375 1.0000 Uani . . . . . . 
C9 C 0.5726(2) 0.8759(3) 0.7896(4) 0.0279 1.0000 Uani . . . . . . 
N10 N 0.59622(19) 0.9286(3) 0.8479(3) 0.0266 1.0000 Uani . . . . . . 
C11 C 0.5691(2) 0.9804(3) 0.8425(4) 0.0241 1.0000 Uani . . . . . . 
N12 N 0.59145(19) 1.0296(3) 0.8945(3) 0.0281 1.0000 Uani . . . . . . 
C13 C 0.5664(2) 1.0882(3) 0.8937(4) 0.0266 1.0000 Uani . . . . . . 
C14 C 0.5512(2) 1.0930(4) 0.9479(4) 0.0300 1.0000 Uani . . . . . . 
C15 C 0.5296(3) 1.1505(4) 0.9497(5) 0.0368 1.0000 Uani . . . . . . 
C16 C 0.5233(3) 1.2028(4) 0.8987(5) 0.0365 1.0000 Uani . . . . . . 
C17 C 0.4994(3) 1.2648(4) 0.9002(6) 0.0513 1.0000 Uani . . . . . . 
C18 C 0.5407(3) 1.1964(4) 0.8468(5) 0.0370 1.0000 Uani . . . . . . 
C19 C 0.5619(2) 1.1402(4) 0.8437(4) 0.0310 1.0000 Uani . . . . . . 
C20 C 0.5797(3) 1.1355(4) 0.7866(5) 0.0380 1.0000 Uani . . . . . . 
C21 C 0.5602(3) 1.0398(4) 1.0079(4) 0.0428 1.0000 Uani . . . . . . 
C22 C 0.6428(2) 1.0303(4) 0.9534(5) 0.0407 1.0000 Uani . . . . . . 
C23 C 0.6677(3) 0.9945(4) 0.9208(5) 0.0391 1.0000 Uani . . . . . . 
C24 C 0.6479(2) 0.9265(4) 0.8987(4) 0.0357 1.0000 Uani . . . . . . 
C25 C 0.6068(3) 0.7930(4) 0.9023(5) 0.0469 1.0000 Uani . . . . . . 
Ir26 Ir 0.688092(9) 0.587020(13) 0.634997(15) 0.0241 1.0000 Uani . . . . . . 
C27 C 0.6761(3) 0.6659(3) 0.5651(4) 0.0301 1.0000 Uani . . . . . . 
N28 N 0.6626(2) 0.6562(2) 0.4859(3) 0.0340 1.0000 Uani D . . . . . 
C29 C 0.6548(2) 0.5904(4) 0.4571(4) 0.0308 1.0000 Uani . . . . . . 
C30 C 0.6136(3) 0.5745(4) 0.3847(4) 0.0371 1.0000 Uani . . . . . . 
C31 C 0.6084(3) 0.5100(4) 0.3577(5) 0.0401 1.0000 Uani . . . . . . 
C32 C 0.6417(3) 0.4627(4) 0.4024(5) 0.0428 1.0000 Uani . . . . . . 
C33 C 0.6814(3) 0.4800(4) 0.4742(5) 0.0379 1.0000 Uani . . . . . . 
C34 C 0.6895(3) 0.5430(4) 0.5037(4) 0.0331 1.0000 Uani . . . . . . 
C35 C 0.7293(3) 0.5608(4) 0.5832(4) 0.0383 1.0000 Uani . . . . . . 
C36 C 0.6331(4) 0.3920(4) 0.3709(6) 0.0580 1.0000 Uani . . . . . . 
C37 C 0.5747(3) 0.6231(5) 0.3370(5) 0.0540 1.0000 Uani . . . . . . 
C38 C 0.6766(5) 0.7039(4) 0.4440(7) 0.0359 0.504(13) Uani D . P 1 1 . 
C39 C 0.6654(4) 0.7716(4) 0.4575(5) 0.0375 0.504(13) Uani D . P 1 1 . 
C40 C 0.6935(5) 0.7849(4) 0.5463(5) 0.0384 0.504(13) Uani D . P 1 1 . 
C41 C 0.6552(5) 0.7086(5) 0.4270(3) 0.0382 0.496(13) Uani D . P 1 2 . 
C42 C 0.6873(5) 0.7648(5) 0.4706(6) 0.0403 0.496(13) Uani D . P 1 2 . 
C43 C 0.6790(6) 0.7855(3) 0.5357(6) 0.0398 0.496(13) Uani D . P 1 2 . 
N44 N 0.6877(2) 0.7292(3) 0.5904(3) 0.0353 1.0000 Uani D . . . . . 
C45 C 0.7032(3) 0.7460(3) 0.6720(4) 0.0331 1.0000 Uani . . . . . . 
C46 C 0.6700(3) 0.7665(3) 0.6904(4) 0.0332 1.0000 Uani . . . . . . 
C47 C 0.6180(3) 0.7721(5) 0.6260(5) 0.0528 1.0000 Uani . . . . . . 
C48 C 0.6853(3) 0.7843(4) 0.7694(5) 0.0382 1.0000 Uani . . . . . . 
C49 C 0.7325(3) 0.7856(4) 0.8285(5) 0.0381 1.0000 Uani . . . . . . 
C50 C 0.7482(4) 0.8061(5) 0.9129(5) 0.0563 1.0000 Uani . . . . . . 
C51 C 0.7651(3) 0.7676(4) 0.8063(4) 0.0368 1.0000 Uani . . . . . . 
C52 C 0.7515(3) 0.7476(3) 0.7298(4) 0.0341 1.0000 Uani . . . . . . 
C53 C 0.7876(3) 0.7270(4) 0.7104(5) 0.0463 1.0000 Uani . . . . . . 
C54 C 0.7009(2) 0.5077(3) 0.7067(4) 0.0280 1.0000 Uani . . . . . . 
N55 N 0.7399(2) 0.4945(3) 0.7782(3) 0.0318 1.0000 Uani . . . . . . 
C56 C 0.7811(2) 0.5346(3) 0.8103(4) 0.0296 1.0000 Uani . . . . . . 
C57 C 0.7851(2) 0.5893(4) 0.8568(4) 0.0288 1.0000 Uani . . . . . . 
C58 C 0.8267(2) 0.6268(4) 0.8884(4) 0.0332 1.0000 Uani . . . . . . 
C59 C 0.8624(3) 0.6110(4) 0.8752(4) 0.0372 1.0000 Uani . . . . . . 
C60 C 0.8576(3) 0.5557(4) 0.8308(5) 0.0409 1.0000 Uani . . . . . . 
C61 C 0.8180(3) 0.5154(4) 0.7998(4) 0.0340 1.0000 Uani . . . . . . 
C62 C 0.8162(3) 0.4533(4) 0.7577(5) 0.0488 1.0000 Uani . . . . . . 
C63 C 0.9060(3) 0.6529(5) 0.9084(5) 0.0533 1.0000 Uani . . . . . . 
C64 C 0.7472(3) 0.6089(4) 0.8716(4) 0.0370 1.0000 Uani . . . . . . 
C65 C 0.7432(3) 0.4387(4) 0.8289(5) 0.0458 1.0000 Uani . . . . . . 
C66 C 0.6973(3) 0.4238(5) 0.8159(5) 0.0600 1.0000 Uani . . . . . . 
C67 C 0.6603(3) 0.4159(4) 0.7318(5) 0.0458 1.0000 Uani . . . . . . 
N68 N 0.6642(2) 0.4661(3) 0.6810(3) 0.0286 1.0000 Uani . . . . . . 
C69 C 0.6219(2) 0.4835(3) 0.6062(4) 0.0281 1.0000 Uani . . . . . . 
C70 C 0.5991(3) 0.4372(4) 0.5464(5) 0.0375 1.0000 Uani . . . . . . 
C71 C 0.5577(3) 0.4554(4) 0.4755(4) 0.0401 1.0000 Uani . . . . . . 
C72 C 0.5389(3) 0.5176(4) 0.4647(5) 0.0395 1.0000 Uani . . . . . . 
C73 C 0.4932(3) 0.5353(5) 0.3881(5) 0.0581 1.0000 Uani . . . . . . 
C74 C 0.5630(3) 0.5635(4) 0.5251(5) 0.0372 1.0000 Uani . . . . . . 
C75 C 0.6048(3) 0.5485(4) 0.5985(4) 0.0332 1.0000 Uani . . . . . . 
C76 C 0.6330(3) 0.5974(4) 0.6620(5) 0.0376 1.0000 Uani . . . . . . 
C77 C 0.6191(3) 0.3696(4) 0.5524(5) 0.0465 1.0000 Uani . . . . . . 
H11 H 0.5000 1.0578 0.7500 0.0345 1.0000 Uiso RS . . . . . 
H21 H 0.5630 0.9893 0.7040 0.0421 1.0000 Uiso R . . . . . 
H22 H 0.5141 0.9692 0.6263 0.0421 1.0000 Uiso R . . . . . 
H41 H 0.5005 0.8530 0.5996 0.0501 1.0000 Uiso R . . . . . 
H63 H 0.4829 0.6987 0.6294 0.0971 1.0000 Uiso R . . . . . 
H62 H 0.5254 0.6951 0.6162 0.0971 1.0000 Uiso R . . . . . 
H61 H 0.4830 0.7417 0.5632 0.0970 1.0000 Uiso R . . . . . 
H71 H 0.5617 0.7193 0.7737 0.0560 1.0000 Uiso R . . . . . 
H151 H 0.5188 1.1544 0.9854 0.0440 1.0000 Uiso R . . . . . 
H173 H 0.4831 1.2842 0.8475 0.0771 1.0000 Uiso R . . . . . 
H172 H 0.5224 1.2950 0.9378 0.0771 1.0000 Uiso R . . . . . 
H171 H 0.4772 1.2552 0.9161 0.0772 1.0000 Uiso R . . . . . 
H181 H 0.5377 1.2318 0.8140 0.0446 1.0000 Uiso R . . . . . 
H201 H 0.5781 1.1779 0.7640 0.0570 1.0000 Uiso R . . . . . 
H202 H 0.6118 1.1204 0.8143 0.0571 1.0000 Uiso R . . . . . 
H203 H 0.5603 1.1054 0.7441 0.0570 1.0000 Uiso R . . . . . 
H213 H 0.5369 1.0424 1.0232 0.0650 1.0000 Uiso R . . . . . 
H212 H 0.5915 1.0450 1.0550 0.0652 1.0000 Uiso R . . . . . 
H211 H 0.5580 0.9978 0.9835 0.0650 1.0000 Uiso R . . . . . 
H221 H 0.6540 1.0750 0.9651 0.0491 1.0000 Uiso R . . . . . 
H222 H 0.6492 1.0094 1.0032 0.0490 1.0000 Uiso R . . . . . 
H231 H 0.7012 0.9924 0.9613 0.0471 1.0000 Uiso R . . . . . 
H232 H 0.6632 1.0166 0.8731 0.0470 1.0000 Uiso R . . . . . 
H241 H 0.6572 0.9025 0.9477 0.0431 1.0000 Uiso R . . . . . 
H242 H 0.6604 0.9048 0.8695 0.0429 1.0000 Uiso R . . . . . 
H251 H 0.5979 0.7496 0.9084 0.0698 1.0000 Uiso R . . . . . 
H252 H 0.6398 0.7943 0.9213 0.0699 1.0000 Uiso R . . . . . 
H253 H 0.6004 0.8229 0.9334 0.0699 1.0000 Uiso R . . . . . 
H261 H 0.7301 0.6230 0.6994 0.0360 1.0000 Uiso R . . . . . 
H311 H 0.5819 0.4987 0.3087 0.0481 1.0000 Uiso R . . . . . 
H331 H 0.7035 0.4477 0.5037 0.0460 1.0000 Uiso R . . . . . 
H351 H 0.7473 0.5973 0.5813 0.0461 1.0000 Uiso R . . . . . 
H352 H 0.7502 0.5243 0.6101 0.0461 1.0000 Uiso R . . . . . 
H363 H 0.6534 0.3623 0.4132 0.0871 1.0000 Uiso R . . . . . 
H362 H 0.6392 0.3885 0.3281 0.0871 1.0000 Uiso R . . . . . 
H361 H 0.6009 0.3801 0.3503 0.0871 1.0000 Uiso R . . . . . 
H371 H 0.5458 0.6002 0.3027 0.0810 1.0000 Uiso R . . . . . 
H372 H 0.5826 0.6491 0.3050 0.0811 1.0000 Uiso R . . . . . 
H373 H 0.5707 0.6508 0.3729 0.0809 1.0000 Uiso R . . . . . 
H381 H 0.7101 0.7001 0.4645 0.0430 0.504(13) Uiso R . P 1 1 . 
H382 H 0.6590 0.6945 0.3868 0.0430 0.504(13) Uiso R . P 1 1 . 
H391 H 0.6741 0.8027 0.4298 0.0451 0.504(13) Uiso R . P 1 1 . 
H392 H 0.6319 0.7754 0.4369 0.0449 0.504(13) Uiso R . P 1 1 . 
H401 H 0.7266 0.7900 0.5640 0.0470 0.504(13) Uiso R . P 1 1 . 
H402 H 0.6820 0.8248 0.5573 0.0470 0.504(13) Uiso R . P 1 1 . 
H411 H 0.6623 0.6912 0.3882 0.0460 0.496(13) Uiso R . P 1 2 . 
H412 H 0.6227 0.7232 0.3991 0.0460 0.496(13) Uiso R . P 1 2 . 
H421 H 0.7199 0.7514 0.4940 0.0490 0.496(13) Uiso R . P 1 2 . 
H422 H 0.6805 0.8008 0.4336 0.0491 0.496(13) Uiso R . P 1 2 . 
H431 H 0.7005 0.8207 0.5664 0.0481 0.496(13) Uiso R . P 1 2 . 
H432 H 0.6469 0.8009 0.5124 0.0479 0.496(13) Uiso R . P 1 2 . 
H471 H 0.5994 0.7671 0.6503 0.0790 1.0000 Uiso R . . . . . 
H472 H 0.6120 0.8145 0.6010 0.0791 1.0000 Uiso R . . . . . 
H473 H 0.6096 0.7386 0.5860 0.0790 1.0000 Uiso R . . . . . 
H481 H 0.6630 0.7958 0.7825 0.0461 1.0000 Uiso R . . . . . 
H503 H 0.7806 0.7944 0.9484 0.0840 1.0000 Uiso R . . . . . 
H502 H 0.7448 0.8525 0.9143 0.0841 1.0000 Uiso R . . . . . 
H501 H 0.7289 0.7851 0.9301 0.0841 1.0000 Uiso R . . . . . 
H511 H 0.7967 0.7703 0.8443 0.0440 1.0000 Uiso R . . . . . 
H533 H 0.8186 0.7353 0.7559 0.0700 1.0000 Uiso R . . . . . 
H532 H 0.7831 0.7514 0.6651 0.0700 1.0000 Uiso R . . . . . 
H531 H 0.7840 0.6813 0.6979 0.0702 1.0000 Uiso R . . . . . 
H581 H 0.8304 0.6635 0.9195 0.0397 1.0000 Uiso R . . . . . 
H601 H 0.8815 0.5450 0.8213 0.0490 1.0000 Uiso R . . . . . 
H623 H 0.8409 0.4531 0.7458 0.0731 1.0000 Uiso R . . . . . 
H622 H 0.8200 0.4167 0.7909 0.0731 1.0000 Uiso R . . . . . 
H621 H 0.7862 0.4501 0.7084 0.0730 1.0000 Uiso R . . . . . 
H631 H 0.9225 0.6431 0.8814 0.0800 1.0000 Uiso R . . . . . 
H632 H 0.9264 0.6450 0.9650 0.0800 1.0000 Uiso R . . . . . 
H633 H 0.8972 0.6982 0.9001 0.0801 1.0000 Uiso R . . . . . 
H643 H 0.7590 0.6420 0.9125 0.0559 1.0000 Uiso R . . . . . 
H642 H 0.7371 0.5721 0.8888 0.0561 1.0000 Uiso R . . . . . 
H641 H 0.7211 0.6261 0.8226 0.0562 1.0000 Uiso R . . . . . 
H651 H 0.7651 0.4492 0.8852 0.0551 1.0000 Uiso R . . . . . 
H652 H 0.7547 0.4006 0.8145 0.0552 1.0000 Uiso R . . . . . 
H661 H 0.6882 0.4594 0.8383 0.0722 1.0000 Uiso R . . . . . 
H662 H 0.6995 0.3835 0.8443 0.0721 1.0000 Uiso R . . . . . 
H671 H 0.6636 0.3732 0.7138 0.0550 1.0000 Uiso R . . . . . 
H672 H 0.6296 0.4195 0.7263 0.0551 1.0000 Uiso R . . . . . 
H711 H 0.5425 0.4251 0.4342 0.0479 1.0000 Uiso R . . . . . 
H733 H 0.4869 0.5812 0.3878 0.0871 1.0000 Uiso R . . . . . 
H732 H 0.4960 0.5251 0.3424 0.0870 1.0000 Uiso R . . . . . 
H731 H 0.4675 0.5108 0.3846 0.0870 1.0000 Uiso R . . . . . 
H741 H 0.5511 0.6058 0.5172 0.0450 1.0000 Uiso R . . . . . 
H761 H 0.6187 0.6406 0.6517 0.0450 1.0000 Uiso R . . . . . 
H762 H 0.6423 0.5835 0.7160 0.0451 1.0000 Uiso R . . . . . 
H771 H 0.6024 0.3490 0.5004 0.0699 1.0000 Uiso R . . . . . 
H772 H 0.6518 0.3725 0.5696 0.0699 1.0000 Uiso R . . . . . 
H773 H 0.6156 0.3438 0.5905 0.0700 1.0000 Uiso R . . . . . 
loop_
_atom_site_aniso_label
_atom_site_aniso_U_11
_atom_site_aniso_U_22
_atom_site_aniso_U_33
_atom_site_aniso_U_23
_atom_site_aniso_U_13
_atom_site_aniso_U_12
Ir1 0.02478(18) 0.02168(17) 0.02133(17) 0.0000 0.01105(14) 0.0000 
C2 0.037(4) 0.045(4) 0.024(3) 0.004(3) 0.018(3) 0.009(3) 
C3 0.030(4) 0.045(5) 0.028(4) 0.002(3) 0.016(3) 0.001(3) 
C4 0.036(4) 0.055(5) 0.029(4) -0.007(4) 0.014(3) 0.000(4) 
C5 0.043(5) 0.056(6) 0.041(5) -0.020(4) 0.018(4) -0.008(4) 
C6 0.066(7) 0.066(7) 0.049(6) -0.028(5) 0.022(5) -0.018(5) 
C7 0.055(5) 0.033(4) 0.045(5) -0.007(4) 0.022(4) -0.004(4) 
C8 0.041(4) 0.038(4) 0.032(4) 0.001(3) 0.018(3) 0.006(3) 
C9 0.023(3) 0.030(4) 0.028(3) -0.005(3) 0.011(3) 0.004(3) 
N10 0.022(3) 0.031(3) 0.024(3) 0.003(2) 0.010(2) 0.006(2) 
C11 0.022(3) 0.024(3) 0.024(3) -0.001(3) 0.010(3) 0.001(3) 
N12 0.024(3) 0.024(3) 0.027(3) -0.003(2) 0.007(2) 0.000(2) 
C13 0.023(3) 0.026(3) 0.026(3) -0.002(3) 0.009(3) 0.001(3) 
C14 0.031(3) 0.028(4) 0.029(3) -0.003(3) 0.015(3) -0.005(3) 
C15 0.029(4) 0.044(4) 0.036(4) -0.009(3) 0.016(3) -0.003(3) 
C16 0.032(4) 0.024(4) 0.045(4) -0.010(3) 0.014(3) -0.005(3) 
C17 0.051(5) 0.039(5) 0.066(6) -0.009(4) 0.032(5) 0.000(4) 
C18 0.030(4) 0.034(4) 0.039(4) 0.004(3) 0.012(3) -0.006(3) 
C19 0.027(3) 0.030(4) 0.029(4) -0.003(3) 0.010(3) -0.007(3) 
C20 0.045(4) 0.033(4) 0.042(4) 0.003(3) 0.027(4) -0.003(3) 
C21 0.054(5) 0.049(5) 0.025(4) -0.001(3) 0.020(4) -0.007(4) 
C22 0.028(4) 0.041(4) 0.034(4) -0.006(3) 0.003(3) -0.004(3) 
C23 0.027(4) 0.039(4) 0.046(5) 0.004(3) 0.015(3) 0.000(3) 
C24 0.028(4) 0.038(4) 0.032(4) -0.004(3) 0.009(3) 0.005(3) 
C25 0.063(6) 0.031(4) 0.036(4) 0.004(3) 0.019(4) -0.002(4) 
Ir26 0.02307(12) 0.02323(12) 0.02139(12) -0.00076(10) 0.00844(9) -0.00021(11) 
C27 0.037(4) 0.028(4) 0.015(3) -0.006(3) 0.007(3) 0.006(3) 
N28 0.049(3) 0.029(3) 0.027(3) 0.006(2) 0.022(3) 0.001(3) 
C29 0.037(4) 0.029(3) 0.028(3) 0.000(3) 0.018(3) -0.005(3) 
C30 0.043(4) 0.035(4) 0.034(4) 0.002(3) 0.020(3) 0.004(3) 
C31 0.046(5) 0.033(4) 0.042(4) -0.004(3) 0.024(4) -0.005(3) 
C32 0.063(5) 0.032(4) 0.046(5) -0.007(4) 0.037(4) -0.011(4) 
C33 0.050(5) 0.035(4) 0.039(4) 0.008(3) 0.030(4) 0.008(4) 
C34 0.037(4) 0.036(4) 0.034(4) 0.005(3) 0.024(3) 0.005(3) 
C35 0.037(4) 0.041(4) 0.032(4) 0.005(3) 0.015(3) 0.011(3) 
C36 0.088(7) 0.037(5) 0.069(6) -0.011(4) 0.055(6) -0.014(5) 
C37 0.053(5) 0.053(6) 0.038(5) 0.003(4) 0.011(4) 0.013(4) 
C38 0.048(5) 0.029(5) 0.031(5) 0.006(4) 0.022(4) 0.000(4) 
C39 0.052(6) 0.031(5) 0.032(5) 0.004(4) 0.024(4) 0.001(5) 
C40 0.054(5) 0.027(5) 0.031(5) 0.004(4) 0.019(4) -0.002(4) 
C41 0.053(5) 0.029(5) 0.030(5) 0.007(4) 0.019(4) 0.004(4) 
C42 0.054(6) 0.030(5) 0.033(5) 0.012(4) 0.020(4) -0.001(5) 
C43 0.055(6) 0.027(5) 0.028(4) 0.006(4) 0.016(4) -0.005(4) 
N44 0.053(3) 0.020(3) 0.027(3) 0.004(2) 0.016(3) -0.002(2) 
C45 0.043(4) 0.024(3) 0.026(3) 0.001(3) 0.014(3) -0.005(3) 
C46 0.036(4) 0.023(3) 0.032(4) -0.003(3) 0.012(3) 0.005(3) 
C47 0.045(5) 0.048(5) 0.046(5) 0.003(4) 0.010(4) 0.008(4) 
C48 0.053(5) 0.025(4) 0.038(4) 0.000(3) 0.025(4) 0.006(3) 
C49 0.058(5) 0.022(4) 0.031(4) 0.002(3) 0.021(4) 0.002(3) 
C50 0.071(6) 0.056(6) 0.034(4) -0.003(4) 0.022(4) 0.007(5) 
C51 0.037(4) 0.030(4) 0.031(4) 0.002(3) 0.008(3) -0.011(3) 
C52 0.038(4) 0.023(3) 0.034(4) -0.005(3) 0.015(3) -0.008(3) 
C53 0.046(5) 0.047(5) 0.052(5) -0.004(4) 0.029(4) -0.014(4) 
C54 0.027(3) 0.028(4) 0.025(3) 0.001(3) 0.010(3) -0.003(3) 
N55 0.033(3) 0.024(3) 0.026(3) 0.008(2) 0.007(3) -0.003(2) 
C56 0.028(3) 0.027(4) 0.026(3) 0.003(3) 0.008(3) 0.001(3) 
C57 0.027(3) 0.030(3) 0.020(3) -0.001(3) 0.006(3) -0.002(3) 
C58 0.031(4) 0.035(4) 0.027(3) -0.002(3) 0.011(3) -0.006(3) 
C59 0.030(4) 0.043(4) 0.031(4) 0.000(3) 0.010(3) -0.007(3) 
C60 0.031(4) 0.053(5) 0.039(4) 0.009(4) 0.019(4) 0.006(4) 
C61 0.041(4) 0.031(4) 0.022(3) 0.006(3) 0.011(3) 0.010(3) 
C62 0.058(5) 0.040(5) 0.042(5) -0.004(4) 0.022(4) 0.012(4) 
C63 0.032(4) 0.074(7) 0.046(5) 0.001(5) 0.015(4) -0.017(4) 
C64 0.038(4) 0.041(4) 0.031(4) 0.000(3) 0.018(3) -0.004(3) 
C65 0.046(5) 0.038(4) 0.033(4) 0.016(3) 0.007(4) -0.010(4) 
C66 0.056(6) 0.066(7) 0.049(5) 0.021(5) 0.021(4) -0.013(5) 
C67 0.051(5) 0.041(4) 0.038(4) 0.014(4) 0.018(4) -0.014(4) 
N68 0.034(3) 0.020(3) 0.026(3) 0.004(2) 0.012(2) -0.009(2) 
C69 0.028(3) 0.026(3) 0.030(3) 0.001(3) 0.015(3) -0.005(3) 
C70 0.035(4) 0.037(4) 0.035(4) -0.002(3) 0.014(3) -0.010(3) 
C71 0.033(4) 0.051(5) 0.025(4) -0.009(3) 0.008(3) -0.015(4) 
C72 0.027(4) 0.049(5) 0.033(4) 0.005(4) 0.009(3) -0.007(4) 
C73 0.040(5) 0.070(7) 0.044(5) 0.019(5) 0.008(4) 0.000(5) 
C74 0.029(4) 0.041(4) 0.038(4) 0.011(3) 0.014(3) 0.004(3) 
C75 0.033(4) 0.036(4) 0.033(4) 0.004(3) 0.019(3) -0.001(3) 
C76 0.033(4) 0.031(4) 0.052(5) 0.001(3) 0.025(4) 0.003(3) 
C77 0.052(5) 0.035(4) 0.043(5) -0.010(4) 0.018(4) -0.003(4) 

_refine_ls_extinction_method 
    'None'
_oxford_refine_ls_scale 0.0310258(15) 
loop_
 _geom_bond_atom_site_label_1
 _geom_bond_site_symmetry_1
 _geom_bond_atom_site_label_2
 _geom_bond_site_symmetry_2
 _geom_bond_distance
 _geom_bond_publ_flag
Ir1 . C2 6_656 2.151(7)    yes
Ir1 . C11 6_656 2.049(6)    yes
Ir1 . C2 . 2.151(7)    yes
Ir1 . C11 . 2.049(6)    yes
Ir1 . H11 . 1.617    no
C2 . C3 . 1.467(11)    yes
C2 . H21 . 0.973    no
C2 . H22 . 0.971    no
C3 . C4 . 1.414(11)    yes
C3 . C9 . 1.411(9)    yes
C4 . C5 . 1.384(12)    yes
C4 . H41 . 0.929    no
C5 . C6 . 1.509(11)    yes
C5 . C7 . 1.386(12)    yes
C6 . H63 . 0.963    no
C6 . H62 . 0.959    no
C6 . H61 . 0.957    no
C7 . C8 . 1.406(11)    yes
C7 . H71 . 0.937    no
C8 . C9 . 1.378(10)    yes
C8 . C25 . 1.495(10)    yes
C9 . N10 . 1.465(8)    yes
N10 . C11 . 1.361(8)    yes
N10 . C24 . 1.469(8)    yes
C11 . N12 . 1.345(8)    yes
N12 . C13 . 1.456(8)    yes
N12 . C22 . 1.478(8)    yes
C13 . C14 . 1.392(9)    yes
C13 . C19 . 1.398(10)    yes
C14 . C15 . 1.391(10)    yes
C14 . C21 . 1.510(10)    yes
C15 . C16 . 1.402(11)    yes
C15 . H151 . 0.936    no
C16 . C17 . 1.507(11)    yes
C16 . C18 . 1.411(11)    yes
C17 . H173 . 0.962    no
C17 . H172 . 0.959    no
C17 . H171 . 0.957    no
C18 . C19 . 1.366(10)    yes
C18 . H181 . 0.938    no
C19 . C20 . 1.512(10)    yes
C20 . H201 . 0.964    no
C20 . H202 . 0.961    no
C20 . H203 . 0.960    no
C21 . H213 . 0.966    no
C21 . H212 . 0.968    no
C21 . H211 . 0.968    no
C22 . C23 . 1.476(11)    yes
C22 . H221 . 0.970    no
C22 . H222 . 0.978    no
C23 . C24 . 1.503(10)    yes
C23 . H231 . 0.973    no
C23 . H232 . 0.975    no
C24 . H241 . 0.970    no
C24 . H242 . 0.971    no
C25 . H251 . 0.964    no
C25 . H252 . 0.960    no
C25 . H253 . 0.960    no
Ir26 . C27 . 2.016(7)    yes
Ir26 . C35 . 2.151(8)    yes
Ir26 . C54 . 2.039(7)    yes
Ir26 . C76 . 2.166(7)    yes
Ir26 . H261 . 1.496    no
C27 . N28 . 1.379(8)    yes
C27 . N44 . 1.369(8)    yes
N28 . C29 . 1.431(9)    yes
N28 . C38 . 1.494(6)    yes
N28 . C29 . 1.431(9)    yes
N28 . C41 . 1.494(6)    yes
C29 . C30 . 1.398(10)    yes
C29 . C34 . 1.416(10)    yes
C30 . C31 . 1.399(11)    yes
C30 . C37 . 1.509(11)    yes
C31 . C32 . 1.384(12)    yes
C31 . H311 . 0.929    no
C32 . C33 . 1.378(11)    yes
C32 . C36 . 1.540(11)    yes
C33 . C34 . 1.382(11)    yes
C33 . H331 . 0.931    no
C34 . C35 . 1.464(10)    yes
C35 . H351 . 0.972    no
C35 . H352 . 0.967    no
C36 . H363 . 0.963    no
C36 . H362 . 0.959    no
C36 . H361 . 0.958    no
C37 . H371 . 0.958    no
C37 . H372 . 0.954    no
C37 . H373 . 0.963    no
C38 . C39 . 1.495(6)    yes
C38 . H381 . 0.970    no
C38 . H382 . 0.971    no
C39 . C40 . 1.501(6)    yes
C39 . H391 . 0.972    no
C39 . H392 . 0.970    no
C40 . N44 . 1.500(6)    yes
C40 . H401 . 0.970    no
C40 . H402 . 0.973    no
C41 . C42 . 1.497(6)    yes
C41 . H411 . 0.970    no
C41 . H412 . 0.971    no
C42 . C43 . 1.494(6)    yes
C42 . H421 . 0.971    no
C42 . H422 . 0.972    no
C43 . N44 . 1.493(6)    yes
C43 . H431 . 0.970    no
C43 . H432 . 0.970    no
N44 . C45 . 1.436(8)    yes
N44 . C45 . 1.436(8)    yes
C45 . C46 . 1.390(11)    yes
C45 . C52 . 1.399(10)    yes
C46 . C47 . 1.523(10)    yes
C46 . C48 . 1.394(10)    yes
C47 . H471 . 0.962    no
C47 . H472 . 0.964    no
C47 . H473 . 0.964    no
C48 . C49 . 1.380(11)    yes
C48 . H481 . 0.933    no
C49 . C50 . 1.504(11)    yes
C49 . C51 . 1.411(11)    yes
C50 . H503 . 0.960    no
C50 . H502 . 0.960    no
C50 . H501 . 0.964    no
C51 . C52 . 1.375(10)    yes
C51 . H511 . 0.917    no
C52 . C53 . 1.495(11)    yes
C53 . H533 . 0.961    no
C53 . H532 . 0.957    no
C53 . H531 . 0.959    no
C54 . N55 . 1.345(8)    yes
C54 . N68 . 1.354(8)    yes
N55 . C56 . 1.431(9)    yes
N55 . C65 . 1.477(9)    yes
C56 . C57 . 1.404(10)    yes
C56 . C61 . 1.400(10)    yes
C57 . C58 . 1.411(9)    yes
C57 . C64 . 1.485(10)    yes
C58 . C59 . 1.378(10)    yes
C58 . H581 . 0.934    no
C59 . C60 . 1.384(11)    yes
C59 . C63 . 1.508(10)    yes
C60 . C61 . 1.396(11)    yes
C60 . H601 . 0.932    no
C61 . C62 . 1.498(10)    yes
C62 . H623 . 0.962    no
C62 . H622 . 0.956    no
C62 . H621 . 0.960    no
C63 . H631 . 0.960    no
C63 . H632 . 0.961    no
C63 . H633 . 0.961    no
C64 . H643 . 0.961    no
C64 . H642 . 0.957    no
C64 . H641 . 0.961    no
C65 . C66 . 1.441(12)    yes
C65 . H651 . 0.973    no
C65 . H652 . 0.974    no
C66 . C67 . 1.457(11)    yes
C66 . H661 . 0.976    no
C66 . H662 . 0.974    no
C67 . N68 . 1.478(9)    yes
C67 . H671 . 0.971    no
C67 . H672 . 0.972    no
N68 . C69 . 1.446(8)    yes
C69 . C70 . 1.383(10)    yes
C69 . C75 . 1.423(10)    yes
C70 . C71 . 1.400(10)    yes
C70 . C77 . 1.513(11)    yes
C71 . C72 . 1.387(12)    yes
C71 . H711 . 0.929    no
C72 . C73 . 1.517(10)    yes
C72 . C74 . 1.389(11)    yes
C73 . H733 . 0.961    no
C73 . H732 . 0.963    no
C73 . H731 . 0.963    no
C74 . C75 . 1.413(10)    yes
C74 . H741 . 0.932    no
C75 . C76 . 1.485(10)    yes
C76 . H761 . 0.974    no
C76 . H762 . 0.972    no
C77 . H771 . 0.963    no
C77 . H772 . 0.957    no
C77 . H773 . 0.966    no
loop_
 _geom_angle_atom_site_label_1
 _geom_angle_site_symmetry_1
 _geom_angle_atom_site_label_2
 _geom_angle_site_symmetry_2
 _geom_angle_atom_site_label_3
 _geom_angle_site_symmetry_3
 _geom_angle
 _geom_angle_publ_flag
C2 6_656 Ir1 . C11 6_656 80.0(3)    yes
C2 6_656 Ir1 . C2 . 162.8(4)    yes
C11 6_656 Ir1 . C2 . 100.3(3)    yes
C2 6_656 Ir1 . C11 . 100.3(3)    yes
C11 6_656 Ir1 . C11 . 178.2(4)    yes
C2 . Ir1 . C11 . 80.0(3)    yes
C2 6_656 Ir1 . H11 . 98.6    no
C11 6_656 Ir1 . H11 . 89.1    no
C2 . Ir1 . H11 . 98.6    no
C11 . Ir1 . H11 . 89.1    no
Ir1 . C2 . C3 . 92.1(5)    yes
Ir1 . C2 . H21 . 112.7    no
C3 . C2 . H21 . 113.8    no
Ir1 . C2 . H22 . 113.9    no
C3 . C2 . H22 . 113.5    no
H21 . C2 . H22 . 109.9    no
C2 . C3 . C4 . 122.5(7)    yes
C2 . C3 . C9 . 121.8(7)    yes
C4 . C3 . C9 . 115.4(7)    yes
C3 . C4 . C5 . 123.3(7)    yes
C3 . C4 . H41 . 118.0    no
C5 . C4 . H41 . 118.7    no
C4 . C5 . C6 . 121.8(8)    yes
C4 . C5 . C7 . 118.0(8)    yes
C6 . C5 . C7 . 120.2(9)    yes
C5 . C6 . H63 . 109.7    no
C5 . C6 . H62 . 109.8    no
H63 . C6 . H62 . 109.1    no
C5 . C6 . H61 . 109.8    no
H63 . C6 . H61 . 109.1    no
H62 . C6 . H61 . 109.4    no
C5 . C7 . C8 . 122.0(8)    yes
C5 . C7 . H71 . 119.5    no
C8 . C7 . H71 . 118.5    no
C7 . C8 . C9 . 117.7(7)    yes
C7 . C8 . C25 . 118.9(7)    yes
C9 . C8 . C25 . 123.3(7)    yes
C3 . C9 . C8 . 123.5(7)    yes
C3 . C9 . N10 . 116.6(6)    yes
C8 . C9 . N10 . 119.8(6)    yes
C9 . N10 . C11 . 116.7(5)    yes
C9 . N10 . C24 . 117.8(5)    yes
C11 . N10 . C24 . 124.8(6)    yes
Ir1 . C11 . N10 . 116.7(5)    yes
Ir1 . C11 . N12 . 126.9(5)    yes
N10 . C11 . N12 . 116.2(5)    yes
C11 . N12 . C13 . 121.4(5)    yes
C11 . N12 . C22 . 123.6(6)    yes
C13 . N12 . C22 . 115.0(5)    yes
N12 . C13 . C14 . 118.8(6)    yes
N12 . C13 . C19 . 119.2(6)    yes
C14 . C13 . C19 . 121.7(7)    yes
C13 . C14 . C15 . 118.5(7)    yes
C13 . C14 . C21 . 122.3(7)    yes
C15 . C14 . C21 . 119.2(7)    yes
C14 . C15 . C16 . 121.1(7)    yes
C14 . C15 . H151 . 119.6    no
C16 . C15 . H151 . 119.3    no
C15 . C16 . C17 . 121.0(8)    yes
C15 . C16 . C18 . 118.2(7)    yes
C17 . C16 . C18 . 120.8(8)    yes
C16 . C17 . H173 . 109.6    no
C16 . C17 . H172 . 109.8    no
H173 . C17 . H172 . 109.3    no
C16 . C17 . H171 . 109.6    no
H173 . C17 . H171 . 109.4    no
H172 . C17 . H171 . 109.1    no
C16 . C18 . C19 . 121.7(7)    yes
C16 . C18 . H181 . 118.6    no
C19 . C18 . H181 . 119.7    no
C13 . C19 . C18 . 118.8(7)    yes
C13 . C19 . C20 . 121.6(7)    yes
C18 . C19 . C20 . 119.7(7)    yes
C19 . C20 . H201 . 109.1    no
C19 . C20 . H202 . 110.6    no
H201 . C20 . H202 . 109.1    no
C19 . C20 . H203 . 109.4    no
H201 . C20 . H203 . 109.4    no
H202 . C20 . H203 . 109.1    no
C14 . C21 . H213 . 109.4    no
C14 . C21 . H212 . 109.6    no
H213 . C21 . H212 . 109.9    no
C14 . C21 . H211 . 109.0    no
H213 . C21 . H211 . 109.5    no
H212 . C21 . H211 . 109.4    no
N12 . C22 . C23 . 109.9(6)    yes
N12 . C22 . H221 . 109.7    no
C23 . C22 . H221 . 109.6    no
N12 . C22 . H222 . 109.4    no
C23 . C22 . H222 . 109.3    no
H221 . C22 . H222 . 108.9    no
C22 . C23 . C24 . 108.9(6)    yes
C22 . C23 . H231 . 109.5    no
C24 . C23 . H231 . 109.7    no
C22 . C23 . H232 . 110.0    no
C24 . C23 . H232 . 109.4    no
H231 . C23 . H232 . 109.4    no
C23 . C24 . N10 . 110.4(6)    yes
C23 . C24 . H241 . 108.7    no
N10 . C24 . H241 . 109.7    no
C23 . C24 . H242 . 109.6    no
N10 . C24 . H242 . 109.1    no
H241 . C24 . H242 . 109.2    no
C8 . C25 . H251 . 109.5    no
C8 . C25 . H252 . 109.4    no
H251 . C25 . H252 . 109.9    no
C8 . C25 . H253 . 109.9    no
H251 . C25 . H253 . 109.2    no
H252 . C25 . H253 . 108.9    no
C27 . Ir26 . C35 . 80.3(3)    yes
C27 . Ir26 . C54 . 179.3(3)    yes
C35 . Ir26 . C54 . 99.5(3)    yes
C27 . Ir26 . C76 . 101.1(3)    yes
C35 . Ir26 . C76 . 165.0(3)    yes
C54 . Ir26 . C76 . 79.2(3)    yes
C27 . Ir26 . H261 . 86.6    no
C35 . Ir26 . H261 . 88.4    no
C54 . Ir26 . H261 . 92.7    no
C76 . Ir26 . H261 . 106.6    no
Ir26 . C27 . N28 . 118.4(5)    yes
Ir26 . C27 . N44 . 126.7(4)    yes
N28 . C27 . N44 . 113.9(6)    yes
C27 . N28 . C29 . 117.4(5)    yes
C27 . N28 . C38 . 120.3(6)    yes
C29 . N28 . C38 . 116.5(5)    yes
C27 . N28 . C29 . 117.4(5)    yes
C27 . N28 . C41 . 125.7(6)    yes
C29 . N28 . C41 . 116.9(6)    yes
N28 . C29 . C30 . 119.8(7)    yes
N28 . C29 . C34 . 118.3(6)    yes
C30 . C29 . C34 . 121.9(7)    yes
C29 . C30 . C31 . 117.7(7)    yes
C29 . C30 . C37 . 122.7(7)    yes
C31 . C30 . C37 . 119.5(7)    yes
C30 . C31 . C32 . 121.5(8)    yes
C30 . C31 . H311 . 119.1    no
C32 . C31 . H311 . 119.4    no
C31 . C32 . C33 . 119.1(7)    yes
C31 . C32 . C36 . 119.1(8)    yes
C33 . C32 . C36 . 121.8(8)    yes
C32 . C33 . C34 . 122.6(8)    yes
C32 . C33 . H331 . 118.4    no
C34 . C33 . H331 . 119.1    no
C29 . C34 . C33 . 117.2(7)    yes
C29 . C34 . C35 . 119.5(7)    yes
C33 . C34 . C35 . 123.0(7)    yes
Ir26 . C35 . C34 . 96.5(5)    yes
Ir26 . C35 . H351 . 112.5    no
C34 . C35 . H351 . 112.7    no
Ir26 . C35 . H352 . 113.0    no
C34 . C35 . H352 . 112.2    no
H351 . C35 . H352 . 109.5    no
C32 . C36 . H363 . 110.6    no
C32 . C36 . H362 . 109.7    no
H363 . C36 . H362 . 109.0    no
C32 . C36 . H361 . 110.0    no
H363 . C36 . H361 . 109.1    no
H362 . C36 . H361 . 108.5    no
C30 . C37 . H371 . 109.4    no
C30 . C37 . H372 . 109.3    no
H371 . C37 . H372 . 109.6    no
C30 . C37 . H373 . 109.9    no
H371 . C37 . H373 . 109.1    no
H372 . C37 . H373 . 109.6    no
N28 . C38 . C39 . 109.42(7)    yes
N28 . C38 . H381 . 109.9    no
C39 . C38 . H381 . 109.9    no
N28 . C38 . H382 . 108.9    no
C39 . C38 . H382 . 109.3    no
H381 . C38 . H382 . 109.4    no
C38 . C39 . C40 . 107.98(7)    yes
C38 . C39 . H391 . 109.6    no
C40 . C39 . H391 . 109.5    no
C38 . C39 . H392 . 109.9    no
C40 . C39 . H392 . 110.7    no
H391 . C39 . H392 . 109.0    no
C39 . C40 . N44 . 109.44(7)    yes
C39 . C40 . H401 . 109.9    no
N44 . C40 . H401 . 109.7    no
C39 . C40 . H402 . 109.1    no
N44 . C40 . H402 . 109.1    no
H401 . C40 . H402 . 109.6    no
N28 . C41 . C42 . 109.43(7)    yes
N28 . C41 . H411 . 109.0    no
C42 . C41 . H411 . 109.6    no
N28 . C41 . H412 . 109.9    no
C42 . C41 . H412 . 109.7    no
H411 . C41 . H412 . 109.2    no
C41 . C42 . C43 . 107.98(7)    yes
C41 . C42 . H421 . 109.9    no
C43 . C42 . H421 . 109.8    no
C41 . C42 . H422 . 109.9    no
C43 . C42 . H422 . 109.8    no
H421 . C42 . H422 . 109.5    no
C42 . C43 . N44 . 109.42(7)    yes
C42 . C43 . H431 . 109.5    no
N44 . C43 . H431 . 109.1    no
C42 . C43 . H432 . 110.0    no
N44 . C43 . H432 . 109.9    no
H431 . C43 . H432 . 108.9    no
C40 . N44 . C27 . 127.6(5)    yes
C40 . N44 . C45 . 112.0(5)    yes
C27 . N44 . C45 . 119.7(5)    yes
C43 . N44 . C27 . 124.2(6)    yes
C43 . N44 . C45 . 115.5(6)    yes
C27 . N44 . C45 . 119.7(5)    yes
N44 . C45 . C46 . 119.1(7)    yes
N44 . C45 . C52 . 119.6(7)    yes
C46 . C45 . C52 . 121.0(7)    yes
C45 . C46 . C47 . 121.5(7)    yes
C45 . C46 . C48 . 118.9(7)    yes
C47 . C46 . C48 . 119.6(7)    yes
C46 . C47 . H471 . 109.4    no
C46 . C47 . H472 . 109.3    no
H471 . C47 . H472 . 109.2    no
C46 . C47 . H473 . 109.7    no
H471 . C47 . H473 . 109.5    no
H472 . C47 . H473 . 109.7    no
C46 . C48 . C49 . 121.9(8)    yes
C46 . C48 . H481 . 119.1    no
C49 . C48 . H481 . 119.0    no
C48 . C49 . C50 . 120.9(8)    yes
C48 . C49 . C51 . 117.3(7)    yes
C50 . C49 . C51 . 121.8(8)    yes
C49 . C50 . H503 . 109.6    no
C49 . C50 . H502 . 109.1    no
H503 . C50 . H502 . 109.3    no
C49 . C50 . H501 . 110.0    no
H503 . C50 . H501 . 109.8    no
H502 . C50 . H501 . 109.0    no
C49 . C51 . C52 . 122.6(7)    yes
C49 . C51 . H511 . 118.3    no
C52 . C51 . H511 . 119.1    no
C45 . C52 . C51 . 118.1(7)    yes
C45 . C52 . C53 . 121.7(7)    yes
C51 . C52 . C53 . 120.2(7)    yes
C52 . C53 . H533 . 109.6    no
C52 . C53 . H532 . 109.1    no
H533 . C53 . H532 . 109.4    no
C52 . C53 . H531 . 109.5    no
H533 . C53 . H531 . 109.7    no
H532 . C53 . H531 . 109.6    no
Ir26 . C54 . N55 . 127.9(5)    yes
Ir26 . C54 . N68 . 115.0(5)    yes
N55 . C54 . N68 . 116.9(6)    yes
C54 . N55 . C56 . 121.5(6)    yes
C54 . N55 . C65 . 122.8(6)    yes
C56 . N55 . C65 . 115.6(5)    yes
N55 . C56 . C57 . 119.1(6)    yes
N55 . C56 . C61 . 119.0(6)    yes
C57 . C56 . C61 . 121.7(6)    yes
C56 . C57 . C58 . 117.1(7)    yes
C56 . C57 . C64 . 122.6(6)    yes
C58 . C57 . C64 . 120.3(7)    yes
C57 . C58 . C59 . 122.4(7)    yes
C57 . C58 . H581 . 119.4    no
C59 . C58 . H581 . 118.2    no
C58 . C59 . C60 . 118.6(7)    yes
C58 . C59 . C63 . 121.1(8)    yes
C60 . C59 . C63 . 120.4(8)    yes
C59 . C60 . C61 . 122.0(7)    yes
C59 . C60 . H601 . 119.0    no
C61 . C60 . H601 . 119.0    no
C56 . C61 . C60 . 118.0(7)    yes
C56 . C61 . C62 . 122.1(7)    yes
C60 . C61 . C62 . 119.9(7)    yes
C61 . C62 . H623 . 109.9    no
C61 . C62 . H622 . 109.9    no
H623 . C62 . H622 . 109.5    no
C61 . C62 . H621 . 109.3    no
H623 . C62 . H621 . 109.3    no
H622 . C62 . H621 . 108.9    no
C59 . C63 . H631 . 110.1    no
C59 . C63 . H632 . 109.9    no
H631 . C63 . H632 . 109.3    no
C59 . C63 . H633 . 109.7    no
H631 . C63 . H633 . 108.8    no
H632 . C63 . H633 . 109.1    no
C57 . C64 . H643 . 109.5    no
C57 . C64 . H642 . 110.2    no
H643 . C64 . H642 . 109.2    no
C57 . C64 . H641 . 109.0    no
H643 . C64 . H641 . 109.4    no
H642 . C64 . H641 . 109.6    no
N55 . C65 . C66 . 110.3(7)    yes
N55 . C65 . H651 . 109.5    no
C66 . C65 . H651 . 110.2    no
N55 . C65 . H652 . 109.2    no
C66 . C65 . H652 . 108.5    no
H651 . C65 . H652 . 109.0    no
C65 . C66 . C67 . 114.5(8)    yes
C65 . C66 . H661 . 108.0    no
C67 . C66 . H661 . 107.9    no
C65 . C66 . H662 . 108.7    no
C67 . C66 . H662 . 108.4    no
H661 . C66 . H662 . 109.3    no
C66 . C67 . N68 . 111.1(7)    yes
C66 . C67 . H671 . 108.5    no
N68 . C67 . H671 . 108.7    no
C66 . C67 . H672 . 109.7    no
N68 . C67 . H672 . 109.1    no
H671 . C67 . H672 . 109.7    no
C67 . N68 . C54 . 124.6(6)    yes
C67 . N68 . C69 . 117.9(6)    yes
C54 . N68 . C69 . 115.6(5)    yes
N68 . C69 . C70 . 119.8(6)    yes
N68 . C69 . C75 . 117.5(6)    yes
C70 . C69 . C75 . 122.7(7)    yes
C69 . C70 . C71 . 118.2(7)    yes
C69 . C70 . C77 . 122.5(7)    yes
C71 . C70 . C77 . 119.1(7)    yes
C70 . C71 . C72 . 121.9(7)    yes
C70 . C71 . H711 . 119.2    no
C72 . C71 . H711 . 118.8    no
C71 . C72 . C73 . 120.7(8)    yes
C71 . C72 . C74 . 118.5(7)    yes
C73 . C72 . C74 . 120.8(8)    yes
C72 . C73 . H733 . 110.0    no
C72 . C73 . H732 . 109.2    no
H733 . C73 . H732 . 109.3    no
C72 . C73 . H731 . 109.8    no
H733 . C73 . H731 . 109.2    no
H732 . C73 . H731 . 109.3    no
C72 . C74 . C75 . 122.6(7)    yes
C72 . C74 . H741 . 118.8    no
C75 . C74 . H741 . 118.6    no
C69 . C75 . C74 . 116.0(7)    yes
C69 . C75 . C76 . 120.0(6)    yes
C74 . C75 . C76 . 123.8(7)    yes
Ir26 . C76 . C75 . 88.6(5)    yes
Ir26 . C76 . H761 . 115.0    no
C75 . C76 . H761 . 114.4    no
Ir26 . C76 . H762 . 113.7    no
C75 . C76 . H762 . 114.3    no
H761 . C76 . H762 . 109.6    no
C70 . C77 . H771 . 109.3    no
C70 . C77 . H772 . 110.0    no
H771 . C77 . H772 . 108.7    no
C70 . C77 . H773 . 109.7    no
H771 . C77 . H773 . 109.6    no
H772 . C77 . H773 . 109.5    no


_iucr_refine_instruction_details_constraints
;
#
# Punched on 22/08/12 at 16:12:05
#
#LIST     12                                                                    
BLOCK SCALE X'S, U'S 
EQUIV PART(1001,OCC) PART(1002,OCC) 
WEIGHT -1 PART(1002,OCC) 
RIDE IR  (   1,X'S) H   (  11,X'S) 
RIDE C   (   2,X'S) H   (  21,X'S) H   (  22,X'S) 
RIDE C   (   4,X'S) H   (  41,X'S) 
RIDE C   (   6,X'S) H   (  63,X'S) H   (  62,X'S) H   (  61,X'S) 
RIDE C   (   7,X'S) H   (  71,X'S) 
RIDE C   (  15,X'S) H   ( 151,X'S) 
RIDE C   (  17,X'S) H   ( 173,X'S) H   ( 172,X'S) H   ( 171,X'S) 
RIDE C   (  18,X'S) H   ( 181,X'S) 
RIDE C   (  20,X'S) H   ( 201,X'S) H   ( 202,X'S) H   ( 203,X'S) 
RIDE C   (  21,X'S) H   ( 213,X'S) H   ( 212,X'S) H   ( 211,X'S) 
RIDE C   (  22,X'S) H   ( 221,X'S) H   ( 222,X'S) 
RIDE C   (  23,X'S) H   ( 231,X'S) H   ( 232,X'S) 
RIDE C   (  24,X'S) H   ( 241,X'S) H   ( 242,X'S) 
RIDE C   (  25,X'S) H   ( 251,X'S) H   ( 252,X'S) H   ( 253,X'S) 
RIDE IR  (  26,X'S) H   ( 261,X'S) 
RIDE C   (  31,X'S) H   ( 311,X'S) 
RIDE C   (  33,X'S) H   ( 331,X'S) 
RIDE C   (  35,X'S) H   ( 351,X'S) H   ( 352,X'S) 
RIDE C   (  36,X'S) H   ( 363,X'S) H   ( 362,X'S) H   ( 361,X'S) 
RIDE C   (  37,X'S) H   ( 371,X'S) H   ( 372,X'S) H   ( 373,X'S) 
RIDE C   (  38,X'S) H   ( 381,X'S) H   ( 382,X'S) 
RIDE C   (  39,X'S) H   ( 391,X'S) H   ( 392,X'S) 
RIDE C   (  40,X'S) H   ( 401,X'S) H   ( 402,X'S) 
RIDE C   (  41,X'S) H   ( 411,X'S) H   ( 412,X'S) 
RIDE C   (  42,X'S) H   ( 421,X'S) H   ( 422,X'S) 
RIDE C   (  43,X'S) H   ( 431,X'S) H   ( 432,X'S) 
RIDE C   (  47,X'S) H   ( 471,X'S) H   ( 472,X'S) H   ( 473,X'S) 
RIDE C   (  48,X'S) H   ( 481,X'S) 
RIDE C   (  50,X'S) H   ( 503,X'S) H   ( 502,X'S) H   ( 501,X'S) 
RIDE C   (  51,X'S) H   ( 511,X'S) 
RIDE C   (  53,X'S) H   ( 533,X'S) H   ( 532,X'S) H   ( 531,X'S) 
RIDE C   (  58,X'S) H   ( 581,X'S) 
RIDE C   (  60,X'S) H   ( 601,X'S) 
RIDE C   (  62,X'S) H   ( 623,X'S) H   ( 622,X'S) H   ( 621,X'S) 
RIDE C   (  63,X'S) H   ( 631,X'S) H   ( 632,X'S) H   ( 633,X'S) 
RIDE C   (  64,X'S) H   ( 643,X'S) H   ( 642,X'S) H   ( 641,X'S) 
RIDE C   (  65,X'S) H   ( 651,X'S) H   ( 652,X'S) 
RIDE C   (  66,X'S) H   ( 661,X'S) H   ( 662,X'S) 
RIDE C   (  67,X'S) H   ( 671,X'S) H   ( 672,X'S) 
RIDE C   (  71,X'S) H   ( 711,X'S) 
RIDE C   (  73,X'S) H   ( 733,X'S) H   ( 732,X'S) H   ( 731,X'S) 
RIDE C   (  74,X'S) H   ( 741,X'S) 
RIDE C   (  76,X'S) H   ( 761,X'S) H   ( 762,X'S) 
RIDE C   (  77,X'S) H   ( 771,X'S) H   ( 772,X'S) H   ( 773,X'S) 
END                                                                             
;


_iucr_refine_instruction_details_restraints
;
#
# Punched on 22/08/12 at 16:12:05
#
#LIST     16                                                                    
SAME  N(28)  C(38)  C(39)  C(40)  N(44)  AND 
CONT  N(44)  C(40)  C(39)  C(38)  N(28)  AND 
CONT  N(28)  C(41)  C(42)  C(43)  N(44)  AND 
CONT  N(44)  C(43)  C(42)  C(41)  N(28) 
SIMU  0.01   N(28)  C(38)  C(39)  C(40)  N(44)  AND 
CONT  N(44)  C(40)  C(39)  C(38)  N(28)  AND 
CONT  N(28)  C(41)  C(42)  C(43)  N(44)  AND 
CONT  N(44)  C(43)  C(42)  C(41)  N(28) 
DELU  0.01   N(28)  C(38)  C(39)  C(40)  N(44)  AND 
CONT  N(44)  C(40)  C(39)  C(38)  N(28)  AND 
CONT  N(28)  C(41)  C(42)  C(43)  N(44)  AND 
CONT  N(44)  C(43)  C(42)  C(41)  N(28) 
END                                                                             
;
#==============================================================================
data_1b
#==============================================================================
_audit_creation_date        "12-08-22"
_audit_creation_method CRYSTALS_ver_14.23

_oxford_structure_analysis_title  '295npct10'
_chemical_name_systematic         .
_chemical_melting_point           .

_cell_length_a                    32.1355(4)
_cell_length_b                    20.8001(3)
_cell_length_c                    20.6871(3)
_cell_angle_alpha                 90
_cell_angle_beta                  120.2697(6)
_cell_angle_gamma                 90
_cell_volume                      11942.5(3)
 
_symmetry_cell_setting            'monoclinic' 
_symmetry_space_group_name_H-M    'C 2/c ' 
_symmetry_space_group_name_Hall   '-C 2yc'
loop_
 _symmetry_equiv_pos_as_xyz
 'x,y,z'
 '-x,-y,-z'
 'x+1/2,y+1/2,z'
 '-x+1/2,-y+1/2,-z'
 'x,-y,z+1/2'
 '-x,y,-z+1/2'
 'x+1/2,-y+1/2,z+1/2'
 '-x+1/2,y+1/2,-z+1/2'

loop_
_atom_type_symbol
_atom_type_scat_dispersion_real
_atom_type_scat_dispersion_imag
_atom_type_scat_Cromer_Mann_a1
_atom_type_scat_Cromer_Mann_b1
_atom_type_scat_Cromer_Mann_a2
_atom_type_scat_Cromer_Mann_b2
_atom_type_scat_Cromer_Mann_a3
_atom_type_scat_Cromer_Mann_b3
_atom_type_scat_Cromer_Mann_a4
_atom_type_scat_Cromer_Mann_b4
_atom_type_scat_Cromer_Mann_c
_atom_type_scat_source  
 C       0.0033   0.0016   2.3100  20.8439   1.0200  10.2075   1.5886   0.5687
   0.8650  51.6512   0.2156 'International Tables Vol C 4.2.6.8 and 6.1.1.4'
 H       0.0000   0.0000   0.4930  10.5109   0.3229  26.1257   0.1402   3.1424
   0.0408  57.7998   0.0030 'International Tables Vol C 4.2.6.8 and 6.1.1.4'
 N       0.0061   0.0033  12.2126   0.0057   3.1322   9.8933   2.0125  28.9975
   1.1663   0.5826 -11.5290 'International Tables Vol C 4.2.6.8 and 6.1.1.4'
 Ir     -1.4442   7.9887  27.3049   1.5928  16.7296   8.8655  15.6115   0.4179
   5.8338  45.0011  11.4722 'International Tables Vol C 4.2.6.8 and 6.1.1.4'
 
 
_cell_formula_units_Z                    12

# Given Formula = C46 H58 Ir1 N4 
# Dc =      1.43 Fooo =   5280.00 Mu =     33.91 M =   1288.82
# Found Formula = C46 H59 Ir1 N4 
# Dc =      1.44 FOOO =   5280.00 Mu =     33.91 M =   1290.33

_chemical_formula_sum             'C46 H59 Ir1 N4'
_chemical_formula_moiety          'C46 H59 Ir1 N4'
_chemical_compound_source                .
_chemical_formula_weight            860.22
 
 
_cell_measurement_reflns_used        13116
_cell_measurement_theta_min              5
_cell_measurement_theta_max             27
_cell_measurement_temperature          150
 
_exptl_crystal_description        'block' 
_exptl_crystal_colour             'red' 
_exptl_crystal_size_min           0.110 
_exptl_crystal_size_mid           0.140 
_exptl_crystal_size_max           0.180 
 
_exptl_crystal_density_diffrn     1.435 
_exptl_crystal_density_meas       . 
_exptl_crystal_density_method     'not measured' 
# Non-dispersive F(000): 
_exptl_crystal_F_000              5280 
_exptl_absorpt_coefficient_mu     3.391 
 
# Sheldrick geometric approximatio 0.62 0.69 
_exptl_absorpt_correction_type    multi-scan 
_exptl_absorpt_process_details    'DENZO/SCALEPACK (Otwinowski & Minor, 1997)' 
_exptl_absorpt_correction_T_min   0.64 
_exptl_absorpt_correction_T_max   0.69 
# For a Kappa CCD, set Tmin to 1.0 and 
# Tmax to the ratio of max:min frame scales in scale_all.log 
_diffrn_measurement_device_type   'Nonius KappaCCD' 
_diffrn_measurement_device        'Area' 
_diffrn_radiation_monochromator   'graphite' 
_diffrn_radiation_type            'Mo K\a'
_diffrn_radiation_wavelength           0.71073
_diffrn_measurement_method        \w 
 
# If a reference occurs more than once, delete the author 
# and date from subsequent references. 
_computing_data_collection        'COLLECT (Nonius, 2001).' 
_computing_cell_refinement        'DENZO/SCALEPACK (Otwinowski & Minor, 1997)' 
_computing_data_reduction         'DENZO/SCALEPACK (Otwinowski & Minor, 1997)' 
_computing_structure_solution     'Superflip (Palatinus & Chapuis, 2007)' 
_computing_structure_refinement   'CRYSTALS (Betteridge et al., 2003)' 
_computing_publication_material   'CRYSTALS (Betteridge et al., 2003)' 
_computing_molecular_graphics     'CAMERON (Watkin et al., 1996)' 
 
_diffrn_standards_interval_time   . 
_diffrn_standards_interval_count  . 
_diffrn_standards_number          0 
_diffrn_standards_decay_%         . 
 
_diffrn_ambient_temperature        150
_diffrn_reflns_number             55182 
_reflns_number_total              13541 
_diffrn_reflns_av_R_equivalents   0.077 
# Number of reflections without Friedels Law is 23762 
# Number of reflections with Friedels Law is 13541 
# Theoretical number of reflections is about 13686 
 
 
_diffrn_reflns_theta_min          5.106 
_diffrn_reflns_theta_max          27.477 
_diffrn_measured_fraction_theta_max 0.990 
 
_diffrn_reflns_theta_full         25.279 
_diffrn_measured_fraction_theta_full 0.991 
 
 
_diffrn_reflns_limit_h_min        -41 
_diffrn_reflns_limit_h_max        41 
_diffrn_reflns_limit_k_min        -22 
_diffrn_reflns_limit_k_max        26 
_diffrn_reflns_limit_l_min        -26 
_diffrn_reflns_limit_l_max        26 
_reflns_limit_h_min               -41 
_reflns_limit_h_max               35 
_reflns_limit_k_min               0 
_reflns_limit_k_max               26 
_reflns_limit_l_min               0 
_reflns_limit_l_max               26 
 
_oxford_diffrn_Wilson_B_factor    1.56 
_oxford_diffrn_Wilson_scale       823.22 
 
_atom_sites_solution_primary      Other  #heavy,direct,difmap,geom
# _atom_sites_solution_secondary  difmap
_atom_sites_solution_hydrogens    difmap
 
_refine_diff_density_min          -5.38 
_refine_diff_density_max          6.37 
 
 
# The current dictionary definitions do not cover the 
# situation where the reflections used for refinement were 
# selected by a user-defined sigma threshold 
 
 
# The values actually used during refinement 
_oxford_reflns_threshold_expression_ref     I>-3.0\s(I)
_refine_ls_number_reflns          13541 
_refine_ls_number_restraints      4 
_refine_ls_number_parameters      693 
_oxford_refine_ls_R_factor_ref    0.1077 
_refine_ls_wR_factor_ref          0.1022 
_refine_ls_goodness_of_fit_ref    0.9979 
_refine_ls_shift/su_max           0.0007090 
_refine_ls_shift/su_mean          0.0000139 
 
 
# The values computed from all data 
_oxford_reflns_number_all         13541 
_refine_ls_R_factor_all           0.1077 
_refine_ls_wR_factor_all          0.1022 
 
# The values computed with a 2 sigma cutoff - a la SHELX 
_reflns_threshold_expression      I>2.0\s(I)
_reflns_number_gt                 8280 
_refine_ls_R_factor_gt            0.0465 
_refine_ls_wR_factor_gt           0.0673 
 
# choose from: rm (reference molecule of known chirality), 
# ad (anomolous dispersion - Flack), rmad (rm and ad), 
# syn (from synthesis), unk (unknown) or . (not applicable). 
_chemical_absolute_configuration  '.' 
 
 
_refine_ls_structure_factor_coef  Fsqd 
_refine_ls_matrix_type            full
_refine_ls_hydrogen_treatment     constr         # none, undef, noref, refall,
                                                 # refxyz, refU, constr or mixed
_refine_ls_weighting_scheme       calc 
_refine_ls_weighting_details 
;
 Method, part 1, Chebychev polynomial, (Watkin, 1994, Prince, 1982) 
 [weight] = 1.0/[A~0~*T~0~(x)+A~1~*T~1~(x) ... +A~n-1~]*T~n-1~(x)] 
 where A~i~ are the Chebychev coefficients listed below and x= Fcalc/Fmax 
 Method = Robust Weighting (Prince, 1982) 
 W = [weight] * [1-(deltaF/6*sigmaF)^2^]^2^ 
 A~i~ are: 
 1.68 0.882 0.122 
;
# Insert your own references if required - in alphabetical order 
_publ_section_references 
; 
Nonius (2001). COLLECT. Nonius BV, Delft, The Netherlands. 
 
Otwinowski, Z. & Minor, W. (1997). Methods in Enzymology, Vol. 276, 
edited by C. W. Carter Jr & R. M. Sweet, pp. 307--326. 
New York: Academic Press. 
 
Betteridge, P.W., Carruthers, J.R., Cooper, R.I., 
Prout, K. & Watkin, D.J. (2003). J. Appl. Cryst. 36, 1487. 
 
Watkin, D.J., Prout, C.K. & Pearce, L.J. (1996). CAMERON, Chemical 
Crystallography Laboratory, Oxford, UK. 
 
Palatinus, L. & Chapuis, G. (2007). J. Appl. Cryst. 40, 786-790. 
 
Watkin D.J. (1994). 
Acta Cryst, A50, 411-437. 
 
Prince, E. 
Mathematical Techniques in Crystallography 
and Materials Science 
Springer-Verlag, New York, 1982. 
 
Larson, A.C. (1970) Crystallographic Computing, Ed Ahmed, F.R., 
Munksgaard, Copenhagen, 291-294. 
; 

# Uequiv = arithmetic mean of Ui i.e. Ueqiv = (U1+U2+U3)/3

# Replace last . with number of unfound hydrogen atoms attached to an atom.

# ..._refinement_flags_... 
# . no refinement constraints           S special position constraint on site
# G rigid group refinement of site      R riding atom
# D distance or angle restraint on site T thermal displacement constraints
# U Uiso or Uij restraint (rigid bond)  P partial occupancy constraint


loop_
_atom_site_label
_atom_site_type_symbol
_atom_site_fract_x
_atom_site_fract_y
_atom_site_fract_z
_atom_site_U_iso_or_equiv
_atom_site_occupancy
_atom_site_adp_type
_atom_site_refinement_flags_posn
_atom_site_refinement_flags_adp
_atom_site_refinement_flags_occupancy
_atom_site_disorder_assembly
_atom_site_disorder_group
_atom_site_attached_hydrogens
Ir1 Ir 0.320385(13) 0.492657(15) 0.398585(19) 0.0203 1.0000 Uani . . . . . . 
C2 C 0.2744(3) 0.4172(4) 0.3551(4) 0.0226 1.0000 Uani . . . . . . 
N3 N 0.2453(3) 0.4032(3) 0.2803(4) 0.0249 1.0000 Uani . . . . . . 
C4 C 0.2388(3) 0.4492(4) 0.2240(5) 0.0231 1.0000 Uani . . . . . . 
C5 C 0.2069(3) 0.5008(4) 0.2091(4) 0.0218 1.0000 Uani . . . . . . 
C6 C 0.1798(3) 0.5100(5) 0.2500(5) 0.0326 1.0000 Uani . . . . . . 
C7 C 0.2011(3) 0.5444(4) 0.1550(5) 0.0270 1.0000 Uani . . . . . . 
C8 C 0.2260(3) 0.5397(4) 0.1161(5) 0.0282 1.0000 Uani . . . . . . 
C9 C 0.2555(3) 0.4869(5) 0.1300(4) 0.0292 1.0000 Uani . . . . . . 
C10 C 0.2623(3) 0.4407(4) 0.1831(5) 0.0251 1.0000 Uani . . . . . . 
C11 C 0.2930(3) 0.3826(4) 0.1916(5) 0.0338 1.0000 Uani . . . . . . 
C12 C 0.2226(3) 0.5911(5) 0.0625(5) 0.0389 1.0000 Uani . . . . . . 
C13 C 0.2260(4) 0.3380(4) 0.2515(5) 0.0321 1.0000 Uani . . . . . . 
C14 C 0.1790(4) 0.3223(5) 0.2490(5) 0.0387 1.0000 Uani . . . . . . 
C15 C 0.1893(4) 0.3071(5) 0.3272(6) 0.0454 1.0000 Uani . . . . . . 
C16 C 0.2158(4) 0.3591(5) 0.3815(5) 0.0404 1.0000 Uani . . . . . . 
N17 N 0.2666(3) 0.3761(4) 0.4010(4) 0.0240 1.0000 Uani . . . . . . 
C18 C 0.3009(3) 0.3801(4) 0.4809(5) 0.0251 1.0000 Uani . . . . . . 
C19 C 0.3112(3) 0.4424(4) 0.5144(5) 0.0282 1.0000 Uani . . . . . . 
C20 C 0.2895(3) 0.4994(5) 0.4686(5) 0.0314 1.0000 Uani . . . . . . 
C21 C 0.3451(3) 0.4431(5) 0.5909(5) 0.0323 1.0000 Uani . . . . . . 
C22 C 0.3654(4) 0.3889(5) 0.6327(5) 0.0356 1.0000 Uani . . . . . . 
C23 C 0.3521(3) 0.3296(5) 0.5980(5) 0.0337 1.0000 Uani . . . . . . 
C24 C 0.3201(4) 0.3245(5) 0.5210(5) 0.0327 1.0000 Uani . . . . . . 
C25 C 0.3075(4) 0.2594(5) 0.4835(6) 0.0429 1.0000 Uani . . . . . . 
C26 C 0.4025(4) 0.3930(6) 0.7159(5) 0.0498 1.0000 Uani . . . . . . 
C27 C 0.3641(3) 0.5703(4) 0.4419(4) 0.0222 1.0000 Uani . . . . . . 
N28 N 0.3531(2) 0.6332(3) 0.4304(4) 0.0226 1.0000 Uani . . . . . . 
C29 C 0.3052(3) 0.6537(4) 0.3847(5) 0.0224 1.0000 Uani . . . . . . 
C30 C 0.2768(3) 0.6728(4) 0.4157(6) 0.0339 1.0000 Uani . . . . . . 
C31 C 0.2982(4) 0.6730(5) 0.5006(6) 0.0411 1.0000 Uani . . . . . . 
C32 C 0.2299(4) 0.6928(4) 0.3696(6) 0.0384 1.0000 Uani . . . . . . 
C33 C 0.2092(4) 0.6958(4) 0.2931(6) 0.0375 1.0000 Uani . . . . . . 
C34 C 0.2377(3) 0.6782(4) 0.2628(5) 0.0271 1.0000 Uani . . . . . . 
C35 C 0.2845(3) 0.6573(4) 0.3060(5) 0.0207 1.0000 Uani . . . . . . 
C36 C 0.3127(3) 0.6373(5) 0.2692(5) 0.0318 1.0000 Uani . . . . . . 
C37 C 0.1572(4) 0.7150(6) 0.2426(7) 0.0553 1.0000 Uani . . . . . . 
C38 C 0.3886(3) 0.6845(4) 0.4745(5) 0.0262 1.0000 Uani . . . . . . 
C39 C 0.4206(3) 0.7018(4) 0.4428(5) 0.0284 1.0000 Uani . . . . . . 
C40 C 0.4423(3) 0.6411(5) 0.4288(5) 0.0331 1.0000 Uani . . . . . . 
C41 C 0.4548(3) 0.5907(4) 0.4879(5) 0.0315 1.0000 Uani . . . . . . 
N42 N 0.4120(2) 0.5543(3) 0.4795(4) 0.0252 1.0000 Uani . . . . . . 
C43 C 0.4185(3) 0.4856(4) 0.4929(5) 0.0229 1.0000 Uani . . . . . . 
C44 C 0.3980(3) 0.4440(4) 0.4307(5) 0.0250 1.0000 Uani . . . . . . 
C45 C 0.3683(3) 0.4707(4) 0.3552(5) 0.0255 1.0000 Uani . . . . . . 
C46 C 0.4025(3) 0.3785(5) 0.4463(6) 0.0326 1.0000 Uani . . . . . . 
C47 C 0.4275(4) 0.3538(5) 0.5177(6) 0.0341 1.0000 Uani . . . . . . 
C48 C 0.4491(4) 0.3967(5) 0.5779(6) 0.0357 1.0000 Uani . . . . . . 
C49 C 0.4442(3) 0.4634(5) 0.5666(5) 0.0283 1.0000 Uani . . . . . . 
C50 C 0.4652(4) 0.5089(6) 0.6323(5) 0.0461 1.0000 Uani . . . . . . 
C51 C 0.4334(4) 0.2826(5) 0.5330(7) 0.0491 1.0000 Uani . . . . . . 
Ir52 Ir 0.500000(7) 0.07188(2) 0.250000(7) 0.0217 1.0000 Uani S T . . . . 
C53 C 0.5524(3) 0.0743(4) 0.3598(5) 0.0251 1.0000 Uani . . . . . . 
N54 N 0.5605(3) 0.1206(4) 0.4114(4) 0.0301 1.0000 Uani . . . . . . 
C55 C 0.5941(3) 0.1125(5) 0.4928(5) 0.0371 1.0000 Uani . . . . . . 
C56 C 0.6463(4) 0.1259(5) 0.5162(5) 0.0440 1.0000 Uani . . . . . . 
C57 C 0.6597(3) 0.0917(5) 0.4647(6) 0.0430 1.0000 Uani . . . . . . 
C58 C 0.6372(3) 0.0256(4) 0.4429(5) 0.0346 1.0000 Uani . . . . . . 
N59 N 0.5850(3) 0.0247(3) 0.3849(4) 0.0262 1.0000 Uani . . . . . . 
C60 C 0.5734(3) -0.0273(4) 0.3329(5) 0.0292 1.0000 Uani . . . . . . 
C61 C 0.5656(3) -0.0117(6) 0.2607(5) 0.0358 1.0000 Uani . . . . . . 
C62 C 0.5621(4) 0.0555(5) 0.2384(6) 0.0402 1.0000 Uani . . . . . . 
C63 C 0.5567(3) -0.0656(6) 0.2130(6) 0.0435 1.0000 Uani . . . . . . 
C64 C 0.5570(4) -0.1272(6) 0.2356(7) 0.0525 1.0000 Uani . . . . . . 
C65 C 0.5645(4) -0.1393(6) 0.3060(7) 0.0485 1.0000 Uani . . . . . . 
C66 C 0.5718(4) -0.0896(5) 0.3561(6) 0.0372 1.0000 Uani . . . . . . 
C67 C 0.5765(4) -0.1035(5) 0.4297(6) 0.0438 1.0000 Uani . . . . . . 
C68 C 0.5483(5) -0.1846(7) 0.1821(8) 0.0714 1.0000 Uani . . . . . . 
C69 C 0.5316(3) 0.1788(4) 0.3895(5) 0.0271 1.0000 Uani . . . . . . 
C70 C 0.4931(3) 0.1835(5) 0.4025(5) 0.0318 1.0000 Uani . . . . . . 
C71 C 0.4655(3) 0.2398(5) 0.3804(5) 0.0329 1.0000 Uani . . . . . . 
C72 C 0.4758(3) 0.2906(5) 0.3469(5) 0.0304 1.0000 Uani . . . . . . 
C73 C 0.5156(3) 0.2846(5) 0.3378(5) 0.0325 1.0000 Uani . . . . . . 
C74 C 0.5435(3) 0.2295(4) 0.3578(5) 0.0247 1.0000 Uani . . . . . . 
C75 C 0.5845(3) 0.2256(5) 0.3433(6) 0.0339 1.0000 Uani . . . . . . 
C76 C 0.4435(4) 0.3491(5) 0.3184(6) 0.0421 1.0000 Uani . . . . . . 
C77 C 0.4807(4) 0.1316(5) 0.4411(5) 0.0449 1.0000 Uani . . . . . . 
H62 H 0.1579 0.5453 0.2283 0.0479 1.0000 Uiso R . . . . . 
H63 H 0.2018 0.5186 0.3018 0.0480 1.0000 Uiso R . . . . . 
H61 H 0.1618 0.4718 0.2458 0.0481 1.0000 Uiso R . . . . . 
H71 H 0.1798 0.5783 0.1442 0.0329 1.0000 Uiso R . . . . . 
H91 H 0.2712 0.4821 0.1028 0.0349 1.0000 Uiso R . . . . . 
H112 H 0.3191 0.3951 0.1842 0.0520 1.0000 Uiso R . . . . . 
H113 H 0.3060 0.3647 0.2409 0.0519 1.0000 Uiso R . . . . . 
H111 H 0.2739 0.3505 0.1553 0.0521 1.0000 Uiso R . . . . . 
H123 H 0.2120 0.5724 0.0143 0.0581 1.0000 Uiso R . . . . . 
H121 H 0.2538 0.6103 0.0806 0.0579 1.0000 Uiso R . . . . . 
H122 H 0.2001 0.6235 0.0582 0.0580 1.0000 Uiso R . . . . . 
H132 H 0.2500 0.3068 0.2833 0.0389 1.0000 Uiso R . . . . . 
H131 H 0.2205 0.3345 0.2008 0.0389 1.0000 Uiso R . . . . . 
H142 H 0.1573 0.3587 0.2292 0.0469 1.0000 Uiso R . . . . . 
H141 H 0.1642 0.2852 0.2171 0.0469 1.0000 Uiso R . . . . . 
H151 H 0.2082 0.2678 0.3440 0.0550 1.0000 Uiso R . . . . . 
H152 H 0.1587 0.3005 0.3253 0.0551 1.0000 Uiso R . . . . . 
H161 H 0.2175 0.3471 0.4282 0.0489 1.0000 Uiso R . . . . . 
H162 H 0.1961 0.3977 0.3615 0.0491 1.0000 Uiso R . . . . . 
H211 H 0.3541 0.4828 0.6148 0.0390 1.0000 Uiso R . . . . . 
H231 H 0.3648 0.2924 0.6263 0.0408 1.0000 Uiso R . . . . . 
H252 H 0.3315 0.2286 0.5148 0.0640 1.0000 Uiso R . . . . . 
H253 H 0.3063 0.2621 0.4363 0.0641 1.0000 Uiso R . . . . . 
H251 H 0.2765 0.2458 0.4752 0.0640 1.0000 Uiso R . . . . . 
H263 H 0.4035 0.3529 0.7398 0.0750 1.0000 Uiso R . . . . . 
H261 H 0.4339 0.4021 0.7232 0.0749 1.0000 Uiso R . . . . . 
H262 H 0.3936 0.4268 0.7384 0.0750 1.0000 Uiso R . . . . . 
H312 H 0.2736 0.6619 0.5119 0.0621 1.0000 Uiso R . . . . . 
H311 H 0.3106 0.7149 0.5203 0.0619 1.0000 Uiso R . . . . . 
H313 H 0.3237 0.6422 0.5233 0.0619 1.0000 Uiso R . . . . . 
H321 H 0.2119 0.7048 0.3913 0.0470 1.0000 Uiso R . . . . . 
H341 H 0.2247 0.6811 0.2110 0.0329 1.0000 Uiso R . . . . . 
H362 H 0.2964 0.6516 0.2179 0.0490 1.0000 Uiso R . . . . . 
H361 H 0.3441 0.6563 0.2954 0.0490 1.0000 Uiso R . . . . . 
H363 H 0.3157 0.5914 0.2705 0.0490 1.0000 Uiso R . . . . . 
H372 H 0.1536 0.7353 0.1985 0.0830 1.0000 Uiso R . . . . . 
H371 H 0.1479 0.7444 0.2688 0.0830 1.0000 Uiso R . . . . . 
H373 H 0.1371 0.6775 0.2287 0.0831 1.0000 Uiso R . . . . . 
H381 H 0.3712 0.7226 0.4751 0.0320 1.0000 Uiso R . . . . . 
H382 H 0.4087 0.6689 0.5253 0.0319 1.0000 Uiso R . . . . . 
H391 H 0.4466 0.7295 0.4781 0.0350 1.0000 Uiso R . . . . . 
H392 H 0.4016 0.7246 0.3957 0.0351 1.0000 Uiso R . . . . . 
H401 H 0.4716 0.6529 0.4291 0.0399 1.0000 Uiso R . . . . . 
H402 H 0.4194 0.6232 0.3802 0.0400 1.0000 Uiso R . . . . . 
H411 H 0.4709 0.6112 0.5365 0.0390 1.0000 Uiso R . . . . . 
H412 H 0.4765 0.5602 0.4850 0.0389 1.0000 Uiso R . . . . . 
H461 H 0.3878 0.3499 0.4063 0.0400 1.0000 Uiso R . . . . . 
H481 H 0.4669 0.3809 0.6266 0.0441 1.0000 Uiso R . . . . . 
H502 H 0.4691 0.4868 0.6756 0.0690 1.0000 Uiso R . . . . . 
H501 H 0.4959 0.5238 0.6414 0.0691 1.0000 Uiso R . . . . . 
H503 H 0.4439 0.5448 0.6215 0.0689 1.0000 Uiso R . . . . . 
H512 H 0.4302 0.2726 0.5757 0.0730 1.0000 Uiso R . . . . . 
H511 H 0.4646 0.2691 0.5426 0.0730 1.0000 Uiso R . . . . . 
H513 H 0.4090 0.2599 0.4900 0.0730 1.0000 Uiso R . . . . . 
H551 H 0.5842 0.1414 0.5197 0.0441 1.0000 Uiso R . . . . . 
H552 H 0.5919 0.0683 0.5062 0.0440 1.0000 Uiso R . . . . . 
H562 H 0.6667 0.1106 0.5670 0.0542 1.0000 Uiso R . . . . . 
H561 H 0.6506 0.1717 0.5142 0.0539 1.0000 Uiso R . . . . . 
H572 H 0.6943 0.0873 0.4899 0.0529 1.0000 Uiso R . . . . . 
H571 H 0.6488 0.1174 0.4197 0.0529 1.0000 Uiso R . . . . . 
H582 H 0.6545 0.0018 0.4234 0.0409 1.0000 Uiso R . . . . . 
H581 H 0.6412 0.0042 0.4877 0.0409 1.0000 Uiso R . . . . . 
H631 H 0.5506 -0.0582 0.1644 0.0520 1.0000 Uiso R . . . . . 
H651 H 0.5647 -0.1816 0.3208 0.0590 1.0000 Uiso R . . . . . 
H671 H 0.5664 -0.1467 0.4306 0.0670 1.0000 Uiso R . . . . . 
H672 H 0.6096 -0.0986 0.4689 0.0671 1.0000 Uiso R . . . . . 
H673 H 0.5566 -0.0744 0.4385 0.0670 1.0000 Uiso R . . . . . 
H681 H 0.5365 -0.2208 0.1968 0.1080 1.0000 Uiso R . . . . . 
H682 H 0.5780 -0.1964 0.1844 0.1081 1.0000 Uiso R . . . . . 
H683 H 0.5251 -0.1727 0.1316 0.1080 1.0000 Uiso R . . . . . 
H711 H 0.4397 0.2434 0.3885 0.0400 1.0000 Uiso R . . . . . 
H731 H 0.5240 0.3188 0.3177 0.0390 1.0000 Uiso R . . . . . 
H751 H 0.5890 0.2665 0.3257 0.0512 1.0000 Uiso R . . . . . 
H752 H 0.6136 0.2143 0.3886 0.0510 1.0000 Uiso R . . . . . 
H753 H 0.5779 0.1934 0.3058 0.0511 1.0000 Uiso R . . . . . 
H761 H 0.4528 0.3754 0.2896 0.0631 1.0000 Uiso R . . . . . 
H763 H 0.4463 0.3736 0.3598 0.0629 1.0000 Uiso R . . . . . 
H762 H 0.4106 0.3360 0.2870 0.0630 1.0000 Uiso R . . . . . 
H773 H 0.4465 0.1304 0.4212 0.0669 1.0000 Uiso R . . . . . 
H772 H 0.4967 0.1401 0.4939 0.0670 1.0000 Uiso R . . . . . 
H771 H 0.4913 0.0907 0.4331 0.0671 1.0000 Uiso R . . . . . 
H11 H 0.2836 0.5323 0.3433 0.0560 1.0000 Uiso R . . . . . 
H621 H 0.5559 0.0612 0.1879 0.0490 1.0000 Uiso R . . . . . 
H201 H 0.2987 0.5383 0.4984 0.0379 1.0000 Uiso R . . . . . 
H451 H 0.3813 0.5078 0.3431 0.0308 1.0000 Uiso R . . . . . 
H452 H 0.3565 0.4399 0.3146 0.0310 1.0000 Uiso R . . . . . 
H202 H 0.2547 0.4967 0.4396 0.0380 1.0000 Uiso R . . . . . 
H622 H 0.5898 0.0813 0.2729 0.0492 1.0000 Uiso R . . . . . 
H521 H 0.5000 0.1434 0.2500 0.0330 1.0000 Uiso RS . . . . . 
loop_
_atom_site_aniso_label
_atom_site_aniso_U_11
_atom_site_aniso_U_22
_atom_site_aniso_U_33
_atom_site_aniso_U_23
_atom_site_aniso_U_13
_atom_site_aniso_U_12
Ir1 0.02114(16) 0.01876(17) 0.01967(15) -0.00030(15) 0.00928(12) -0.00022(16) 
C2 0.029(5) 0.021(4) 0.016(4) 0.001(3) 0.010(4) 0.005(4) 
N3 0.031(4) 0.019(4) 0.028(4) -0.003(3) 0.017(3) -0.008(3) 
C4 0.032(5) 0.018(4) 0.022(4) 0.002(3) 0.016(4) -0.005(4) 
C5 0.020(4) 0.020(4) 0.021(4) -0.006(4) 0.007(3) -0.005(4) 
C6 0.024(4) 0.044(5) 0.033(4) 0.008(5) 0.017(4) 0.010(4) 
C7 0.030(5) 0.026(5) 0.023(4) -0.004(4) 0.011(4) -0.006(4) 
C8 0.028(5) 0.029(5) 0.023(4) -0.001(4) 0.008(4) -0.010(4) 
C9 0.033(5) 0.038(5) 0.018(4) -0.002(4) 0.014(4) -0.002(4) 
C10 0.025(4) 0.023(4) 0.030(4) -0.005(4) 0.015(4) -0.001(3) 
C11 0.036(5) 0.033(5) 0.037(5) -0.010(4) 0.022(5) -0.006(4) 
C12 0.032(5) 0.043(6) 0.041(6) 0.005(5) 0.018(5) -0.014(4) 
C13 0.044(6) 0.019(4) 0.024(5) -0.005(4) 0.010(4) -0.014(4) 
C14 0.037(6) 0.035(5) 0.034(5) -0.010(4) 0.010(5) -0.018(5) 
C15 0.049(7) 0.041(6) 0.050(7) -0.009(5) 0.028(6) -0.021(5) 
C16 0.053(7) 0.042(6) 0.034(5) -0.007(5) 0.028(5) -0.017(5) 
N17 0.031(4) 0.022(4) 0.022(4) 0.001(3) 0.015(3) -0.006(3) 
C18 0.034(5) 0.028(5) 0.022(4) 0.001(4) 0.020(4) -0.004(4) 
C19 0.040(5) 0.027(5) 0.029(5) -0.003(4) 0.027(4) -0.002(4) 
C20 0.039(5) 0.024(5) 0.040(5) -0.011(4) 0.027(4) -0.005(4) 
C21 0.036(5) 0.042(6) 0.027(5) -0.007(4) 0.021(4) -0.005(4) 
C22 0.040(6) 0.044(6) 0.030(5) 0.005(4) 0.022(5) -0.001(5) 
C23 0.034(5) 0.038(6) 0.032(5) 0.017(4) 0.019(4) 0.007(4) 
C24 0.043(6) 0.032(5) 0.034(5) 0.004(4) 0.027(5) -0.003(4) 
C25 0.061(7) 0.027(5) 0.045(6) 0.011(5) 0.030(6) 0.005(5) 
C26 0.041(6) 0.077(8) 0.031(6) 0.001(5) 0.018(5) -0.011(6) 
C27 0.010(4) 0.023(4) 0.016(4) -0.005(3) -0.007(3) 0.002(3) 
N28 0.024(4) 0.017(3) 0.025(4) -0.004(3) 0.011(3) 0.002(3) 
C29 0.033(5) 0.007(4) 0.035(5) -0.002(3) 0.022(4) -0.006(3) 
C30 0.034(5) 0.024(5) 0.044(6) -0.008(4) 0.020(5) -0.006(4) 
C31 0.049(7) 0.036(6) 0.052(7) -0.015(5) 0.035(6) -0.011(5) 
C32 0.040(6) 0.021(5) 0.064(7) -0.006(5) 0.034(6) -0.001(4) 
C33 0.035(6) 0.020(5) 0.058(7) 0.006(4) 0.024(5) 0.002(4) 
C34 0.024(5) 0.022(4) 0.029(5) 0.011(4) 0.009(4) 0.004(4) 
C35 0.020(4) 0.010(4) 0.027(4) 0.001(3) 0.008(4) -0.002(3) 
C36 0.033(5) 0.033(5) 0.028(5) 0.002(4) 0.014(4) -0.003(4) 
C37 0.025(5) 0.048(7) 0.083(9) 0.012(6) 0.020(6) 0.009(5) 
C38 0.024(5) 0.023(5) 0.021(4) -0.010(4) 0.005(4) -0.007(4) 
C39 0.024(5) 0.019(4) 0.035(5) 0.002(4) 0.009(4) -0.006(4) 
C40 0.027(5) 0.038(5) 0.030(5) 0.002(4) 0.012(4) -0.006(4) 
C41 0.023(4) 0.025(5) 0.041(5) -0.001(4) 0.012(4) 0.004(4) 
N42 0.018(4) 0.024(4) 0.023(4) 0.001(3) 0.002(3) -0.004(3) 
C43 0.011(4) 0.024(4) 0.027(4) 0.005(4) 0.005(3) 0.002(3) 
C44 0.023(4) 0.019(4) 0.037(5) 0.003(4) 0.019(4) 0.007(4) 
C45 0.023(4) 0.030(5) 0.023(4) -0.007(4) 0.011(4) -0.005(4) 
C46 0.032(5) 0.030(5) 0.043(6) -0.007(4) 0.024(5) -0.003(4) 
C47 0.035(5) 0.025(5) 0.055(7) 0.007(5) 0.032(5) 0.008(4) 
C48 0.034(6) 0.037(6) 0.039(6) 0.016(5) 0.020(5) 0.007(4) 
C49 0.021(5) 0.037(5) 0.027(5) 0.004(4) 0.013(4) 0.007(4) 
C50 0.044(6) 0.053(7) 0.026(5) 0.015(5) 0.007(4) 0.003(6) 
C51 0.052(7) 0.030(6) 0.066(8) 0.010(5) 0.030(6) 0.002(5) 
Ir52 0.0230(3) 0.0191(3) 0.0216(3) 0.0000 0.0102(2) 0.0000 
C53 0.018(4) 0.027(4) 0.030(4) 0.002(4) 0.011(4) -0.002(4) 
N54 0.033(4) 0.028(4) 0.021(4) -0.001(3) 0.008(3) 0.004(3) 
C55 0.033(5) 0.045(6) 0.018(4) 0.005(4) 0.001(4) 0.006(5) 
C56 0.045(6) 0.035(6) 0.031(5) -0.009(4) 0.003(5) 0.009(5) 
C57 0.021(5) 0.040(6) 0.046(6) 0.003(5) 0.001(4) 0.002(4) 
C58 0.025(5) 0.026(5) 0.037(5) 0.007(4) 0.004(4) 0.008(4) 
N59 0.022(4) 0.026(4) 0.026(4) 0.005(3) 0.009(3) 0.005(3) 
C60 0.025(5) 0.029(5) 0.033(5) -0.001(4) 0.015(4) 0.008(4) 
C61 0.022(4) 0.058(7) 0.026(4) 0.005(5) 0.012(4) 0.015(5) 
C62 0.041(6) 0.055(7) 0.031(5) 0.020(5) 0.023(5) 0.028(5) 
C63 0.021(5) 0.073(8) 0.032(5) -0.010(6) 0.010(4) 0.006(5) 
C64 0.036(6) 0.063(8) 0.054(8) -0.030(7) 0.019(6) -0.012(6) 
C65 0.042(7) 0.045(7) 0.057(8) -0.012(6) 0.023(6) -0.005(5) 
C66 0.037(6) 0.036(6) 0.032(5) 0.002(4) 0.013(5) -0.001(4) 
C67 0.051(7) 0.030(5) 0.050(7) 0.014(5) 0.025(6) 0.006(5) 
C68 0.073(9) 0.071(9) 0.071(9) -0.042(8) 0.037(8) -0.015(8) 
C69 0.019(4) 0.030(5) 0.021(4) -0.009(4) 0.002(3) 0.000(4) 
C70 0.034(5) 0.041(6) 0.016(4) -0.009(4) 0.009(4) -0.004(4) 
C71 0.025(5) 0.043(6) 0.027(5) -0.018(4) 0.009(4) -0.003(4) 
C72 0.019(4) 0.033(5) 0.027(5) -0.012(4) 0.003(4) 0.005(4) 
C73 0.026(5) 0.034(5) 0.024(5) -0.008(4) 0.003(4) -0.008(4) 
C74 0.024(4) 0.022(4) 0.019(4) -0.001(3) 0.004(4) 0.005(4) 
C75 0.027(5) 0.030(5) 0.042(6) 0.000(4) 0.015(4) 0.000(4) 
C76 0.035(6) 0.043(6) 0.035(6) -0.006(5) 0.008(5) 0.009(5) 
C77 0.050(7) 0.055(7) 0.032(5) -0.007(5) 0.023(5) -0.009(5) 

_refine_ls_extinction_coef 160(10) 
_refine_ls_extinction_method 
    'Larson (1970), Equation 22'
_oxford_refine_ls_scale 0.0214073(13) 
loop_
 _geom_bond_atom_site_label_1
 _geom_bond_site_symmetry_1
 _geom_bond_atom_site_label_2
 _geom_bond_site_symmetry_2
 _geom_bond_distance
 _geom_bond_publ_flag
Ir1 . C2 . 2.028(9)    yes
Ir1 . C20 . 2.135(8)    yes
Ir1 . C27 . 2.029(8)    yes
Ir1 . C45 . 2.186(9)    yes
Ir1 . H11 . 1.422    no
C2 . N3 . 1.378(10)    yes
C2 . N17 . 1.392(10)    yes
N3 . C4 . 1.438(10)    yes
N3 . C13 . 1.486(10)    yes
C4 . C5 . 1.407(11)    yes
C4 . C10 . 1.403(11)    yes
C5 . C6 . 1.501(10)    yes
C5 . C7 . 1.377(11)    yes
C6 . H62 . 0.959    no
C6 . H63 . 0.957    no
C6 . H61 . 0.959    no
C7 . C8 . 1.395(12)    yes
C7 . H71 . 0.929    no
C8 . C9 . 1.382(12)    yes
C8 . C12 . 1.505(12)    yes
C9 . C10 . 1.391(12)    yes
C9 . H91 . 0.932    no
C10 . C11 . 1.513(12)    yes
C11 . H112 . 0.961    no
C11 . H113 . 0.960    no
C11 . H111 . 0.960    no
C12 . H123 . 0.959    no
C12 . H121 . 0.961    no
C12 . H122 . 0.959    no
C13 . C14 . 1.521(13)    yes
C13 . H132 . 0.968    no
C13 . H131 . 0.973    no
C14 . C15 . 1.512(13)    yes
C14 . H142 . 0.969    no
C14 . H141 . 0.970    no
C15 . C16 . 1.481(13)    yes
C15 . H151 . 0.972    no
C15 . H152 . 0.973    no
C16 . N17 . 1.514(12)    yes
C16 . H161 . 0.971    no
C16 . H162 . 0.975    no
N17 . C18 . 1.455(11)    yes
C18 . C19 . 1.427(12)    yes
C18 . C24 . 1.376(12)    yes
C19 . C20 . 1.457(12)    yes
C19 . C21 . 1.398(12)    yes
C20 . H201 . 0.968    no
C20 . H202 . 0.968    no
C21 . C22 . 1.368(13)    yes
C21 . H211 . 0.932    no
C22 . C23 . 1.382(14)    yes
C22 . C26 . 1.524(13)    yes
C23 . C24 . 1.398(13)    yes
C23 . H231 . 0.932    no
C24 . C25 . 1.511(13)    yes
C25 . H252 . 0.961    no
C25 . H253 . 0.959    no
C25 . H251 . 0.962    no
C26 . H263 . 0.963    no
C26 . H261 . 0.961    no
C26 . H262 . 0.962    no
C27 . N28 . 1.344(11)    yes
C27 . N42 . 1.372(10)    yes
N28 . C29 . 1.404(11)    yes
N28 . C38 . 1.491(10)    yes
C29 . C30 . 1.411(12)    yes
C29 . C35 . 1.417(12)    yes
C30 . C31 . 1.530(14)    yes
C30 . C32 . 1.380(13)    yes
C31 . H312 . 0.959    no
C31 . H311 . 0.959    no
C31 . H313 . 0.958    no
C32 . C33 . 1.375(14)    yes
C32 . H321 . 0.929    no
C33 . C34 . 1.398(13)    yes
C33 . C37 . 1.510(13)    yes
C34 . C35 . 1.374(11)    yes
C34 . H341 . 0.934    no
C35 . C36 . 1.506(12)    yes
C36 . H362 . 0.963    no
C36 . H361 . 0.959    no
C36 . H363 . 0.960    no
C37 . H372 . 0.959    no
C37 . H371 . 0.960    no
C37 . H373 . 0.960    no
C38 . C39 . 1.514(12)    yes
C38 . H381 . 0.975    no
C38 . H382 . 0.971    no
C39 . C40 . 1.540(13)    yes
C39 . H391 . 0.974    no
C39 . H392 . 0.973    no
C40 . C41 . 1.505(12)    yes
C40 . H401 . 0.969    no
C40 . H402 . 0.972    no
C41 . N42 . 1.500(11)    yes
C41 . H411 . 0.968    no
C41 . H412 . 0.969    no
N42 . C43 . 1.452(11)    yes
C43 . C44 . 1.408(12)    yes
C43 . C49 . 1.396(12)    yes
C44 . C45 . 1.468(12)    yes
C44 . C46 . 1.391(12)    yes
C45 . H451 . 0.968    no
C45 . H452 . 0.969    no
C46 . C47 . 1.376(13)    yes
C46 . H461 . 0.931    no
C47 . C48 . 1.399(14)    yes
C47 . C51 . 1.506(13)    yes
C48 . C49 . 1.403(13)    yes
C48 . H481 . 0.931    no
C49 . C50 . 1.508(13)    yes
C50 . H502 . 0.958    no
C50 . H501 . 0.958    no
C50 . H503 . 0.959    no
C51 . H512 . 0.960    no
C51 . H511 . 0.960    no
C51 . H513 . 0.962    no
Ir52 . C62 6_655 2.155(9)    yes
Ir52 . C53 6_655 2.035(8)    yes
Ir52 . C53 . 2.035(8)    yes
Ir52 . C62 . 2.155(9)    yes
Ir52 . H521 . 1.488    no
C53 . N54 . 1.361(11)    yes
C53 . N59 . 1.372(11)    yes
N54 . C55 . 1.483(10)    yes
N54 . C69 . 1.454(11)    yes
C55 . C56 . 1.518(13)    yes
C55 . H551 . 0.973    no
C55 . H552 . 0.974    no
C56 . C57 . 1.515(14)    yes
C56 . H562 . 0.969    no
C56 . H561 . 0.967    no
C57 . C58 . 1.513(13)    yes
C57 . H572 . 0.966    no
C57 . H571 . 0.971    no
C58 . N59 . 1.492(10)    yes
C58 . H582 . 0.972    no
C58 . H581 . 0.976    no
N59 . C60 . 1.434(11)    yes
C60 . C61 . 1.423(12)    yes
C60 . C66 . 1.393(13)    yes
C61 . C62 . 1.459(15)    yes
C61 . C63 . 1.423(15)    yes
C62 . H621 . 0.968    no
C62 . H622 . 0.975    no
C63 . C64 . 1.363(17)    yes
C63 . H631 . 0.935    no
C64 . C65 . 1.374(16)    yes
C64 . C68 . 1.555(15)    yes
C65 . C66 . 1.398(14)    yes
C65 . H651 . 0.930    no
C66 . C67 . 1.481(14)    yes
C67 . H671 . 0.959    no
C67 . H672 . 0.963    no
C67 . H673 . 0.964    no
C68 . H681 . 0.960    no
C68 . H682 . 0.960    no
C68 . H683 . 0.960    no
C69 . C70 . 1.395(12)    yes
C69 . C74 . 1.393(12)    yes
C70 . C71 . 1.400(13)    yes
C70 . C77 . 1.510(13)    yes
C71 . C72 . 1.393(13)    yes
C71 . H711 . 0.929    no
C72 . C73 . 1.388(12)    yes
C72 . C76 . 1.512(12)    yes
C73 . C74 . 1.384(12)    yes
C73 . H731 . 0.931    no
C74 . C75 . 1.495(12)    yes
C75 . H751 . 0.963    no
C75 . H752 . 0.962    no
C75 . H753 . 0.963    no
C76 . H761 . 0.961    no
C76 . H763 . 0.962    no
C76 . H762 . 0.961    no
C77 . H773 . 0.960    no
C77 . H772 . 0.961    no
C77 . H771 . 0.961    no
loop_
 _geom_angle_atom_site_label_1
 _geom_angle_site_symmetry_1
 _geom_angle_atom_site_label_2
 _geom_angle_site_symmetry_2
 _geom_angle_atom_site_label_3
 _geom_angle_site_symmetry_3
 _geom_angle
 _geom_angle_publ_flag
C2 . Ir1 . C20 . 82.4(3)    yes
C2 . Ir1 . C27 . 177.5(4)    yes
C20 . Ir1 . C27 . 95.9(3)    yes
C2 . Ir1 . C45 . 99.4(3)    yes
C20 . Ir1 . C45 . 163.2(3)    yes
C27 . Ir1 . C45 . 82.7(3)    yes
C2 . Ir1 . H11 . 88.1    no
C20 . Ir1 . H11 . 91.5    no
C27 . Ir1 . H11 . 90.2    no
C45 . Ir1 . H11 . 105.2    no
Ir1 . C2 . N3 . 126.3(6)    yes
Ir1 . C2 . N17 . 121.0(6)    yes
N3 . C2 . N17 . 112.5(7)    yes
C2 . N3 . C4 . 120.5(7)    yes
C2 . N3 . C13 . 123.6(7)    yes
C4 . N3 . C13 . 115.0(7)    yes
N3 . C4 . C5 . 118.5(7)    yes
N3 . C4 . C10 . 120.2(8)    yes
C5 . C4 . C10 . 121.3(7)    yes
C4 . C5 . C6 . 122.6(7)    yes
C4 . C5 . C7 . 117.7(7)    yes
C6 . C5 . C7 . 119.6(8)    yes
C5 . C6 . H62 . 109.3    no
C5 . C6 . H63 . 110.1    no
H62 . C6 . H63 . 109.5    no
C5 . C6 . H61 . 109.8    no
H62 . C6 . H61 . 109.0    no
H63 . C6 . H61 . 109.1    no
C5 . C7 . C8 . 122.7(8)    yes
C5 . C7 . H71 . 118.5    no
C8 . C7 . H71 . 118.8    no
C7 . C8 . C9 . 117.9(8)    yes
C7 . C8 . C12 . 121.8(8)    yes
C9 . C8 . C12 . 120.3(8)    yes
C8 . C9 . C10 . 122.2(8)    yes
C8 . C9 . H91 . 118.9    no
C10 . C9 . H91 . 118.9    no
C4 . C10 . C9 . 118.0(8)    yes
C4 . C10 . C11 . 123.2(8)    yes
C9 . C10 . C11 . 118.7(8)    yes
C10 . C11 . H112 . 109.5    no
C10 . C11 . H113 . 110.0    no
H112 . C11 . H113 . 109.1    no
C10 . C11 . H111 . 110.0    no
H112 . C11 . H111 . 109.1    no
H113 . C11 . H111 . 109.1    no
C8 . C12 . H123 . 109.4    no
C8 . C12 . H121 . 109.6    no
H123 . C12 . H121 . 109.2    no
C8 . C12 . H122 . 109.7    no
H123 . C12 . H122 . 109.4    no
H121 . C12 . H122 . 109.5    no
N3 . C13 . C14 . 114.6(8)    yes
N3 . C13 . H132 . 108.1    no
C14 . C13 . H132 . 108.4    no
N3 . C13 . H131 . 108.2    no
C14 . C13 . H131 . 108.0    no
H132 . C13 . H131 . 109.4    no
C13 . C14 . C15 . 109.3(8)    yes
C13 . C14 . H142 . 109.6    no
C15 . C14 . H142 . 109.9    no
C13 . C14 . H141 . 109.3    no
C15 . C14 . H141 . 109.2    no
H142 . C14 . H141 . 109.4    no
C14 . C15 . C16 . 113.0(8)    yes
C14 . C15 . H151 . 108.6    no
C16 . C15 . H151 . 109.0    no
C14 . C15 . H152 . 108.3    no
C16 . C15 . H152 . 108.4    no
H151 . C15 . H152 . 109.5    no
C15 . C16 . N17 . 120.2(9)    yes
C15 . C16 . H161 . 106.9    no
N17 . C16 . H161 . 106.3    no
C15 . C16 . H162 . 106.1    no
N17 . C16 . H162 . 107.6    no
H161 . C16 . H162 . 109.5    no
C16 . N17 . C2 . 120.2(7)    yes
C16 . N17 . C18 . 114.5(7)    yes
C2 . N17 . C18 . 116.5(7)    yes
N17 . C18 . C19 . 117.4(8)    yes
N17 . C18 . C24 . 119.3(8)    yes
C19 . C18 . C24 . 123.2(8)    yes
C18 . C19 . C20 . 120.4(8)    yes
C18 . C19 . C21 . 114.6(8)    yes
C20 . C19 . C21 . 124.9(8)    yes
Ir1 . C20 . C19 . 98.8(5)    yes
Ir1 . C20 . H201 . 112.9    no
C19 . C20 . H201 . 111.9    no
Ir1 . C20 . H202 . 111.2    no
C19 . C20 . H202 . 112.4    no
H201 . C20 . H202 . 109.4    no
C19 . C21 . C22 . 124.0(9)    yes
C19 . C21 . H211 . 117.8    no
C22 . C21 . H211 . 118.2    no
C21 . C22 . C23 . 118.9(9)    yes
C21 . C22 . C26 . 121.3(9)    yes
C23 . C22 . C26 . 119.8(9)    yes
C22 . C23 . C24 . 121.1(9)    yes
C22 . C23 . H231 . 119.6    no
C24 . C23 . H231 . 119.3    no
C23 . C24 . C18 . 118.1(9)    yes
C23 . C24 . C25 . 120.5(9)    yes
C18 . C24 . C25 . 121.5(9)    yes
C24 . C25 . H252 . 109.6    no
C24 . C25 . H253 . 109.5    no
H252 . C25 . H253 . 109.4    no
C24 . C25 . H251 . 109.8    no
H252 . C25 . H251 . 109.3    no
H253 . C25 . H251 . 109.3    no
C22 . C26 . H263 . 109.7    no
C22 . C26 . H261 . 110.4    no
H263 . C26 . H261 . 109.2    no
C22 . C26 . H262 . 109.5    no
H263 . C26 . H262 . 109.0    no
H261 . C26 . H262 . 109.0    no
Ir1 . C27 . N28 . 129.4(6)    yes
Ir1 . C27 . N42 . 112.7(6)    yes
N28 . C27 . N42 . 117.1(7)    yes
C27 . N28 . C29 . 121.0(7)    yes
C27 . N28 . C38 . 122.4(7)    yes
C29 . N28 . C38 . 115.9(6)    yes
N28 . C29 . C30 . 121.3(8)    yes
N28 . C29 . C35 . 120.8(7)    yes
C30 . C29 . C35 . 117.9(8)    yes
C29 . C30 . C31 . 120.2(9)    yes
C29 . C30 . C32 . 120.2(9)    yes
C31 . C30 . C32 . 119.5(9)    yes
C30 . C31 . H312 . 109.4    no
C30 . C31 . H311 . 109.9    no
H312 . C31 . H311 . 109.3    no
C30 . C31 . H313 . 109.8    no
H312 . C31 . H313 . 109.1    no
H311 . C31 . H313 . 109.3    no
C30 . C32 . C33 . 122.4(10)    yes
C30 . C32 . H321 . 118.6    no
C33 . C32 . H321 . 119.0    no
C32 . C33 . C34 . 117.2(9)    yes
C32 . C33 . C37 . 122.3(10)    yes
C34 . C33 . C37 . 120.4(10)    yes
C33 . C34 . C35 . 122.7(9)    yes
C33 . C34 . H341 . 118.7    no
C35 . C34 . H341 . 118.6    no
C29 . C35 . C34 . 119.5(8)    yes
C29 . C35 . C36 . 120.7(7)    yes
C34 . C35 . C36 . 119.8(8)    yes
C35 . C36 . H362 . 109.9    no
C35 . C36 . H361 . 109.4    no
H362 . C36 . H361 . 109.2    no
C35 . C36 . H363 . 109.8    no
H362 . C36 . H363 . 109.1    no
H361 . C36 . H363 . 109.4    no
C33 . C37 . H372 . 109.7    no
C33 . C37 . H371 . 109.2    no
H372 . C37 . H371 . 109.5    no
C33 . C37 . H373 . 109.6    no
H372 . C37 . H373 . 109.4    no
H371 . C37 . H373 . 109.4    no
N28 . C38 . C39 . 112.5(7)    yes
N28 . C38 . H381 . 108.8    no
C39 . C38 . H381 . 109.3    no
N28 . C38 . H382 . 108.0    no
C39 . C38 . H382 . 108.9    no
H381 . C38 . H382 . 109.3    no
C38 . C39 . C40 . 111.0(7)    yes
C38 . C39 . H391 . 109.3    no
C40 . C39 . H391 . 109.0    no
C38 . C39 . H392 . 109.2    no
C40 . C39 . H392 . 109.0    no
H391 . C39 . H392 . 109.4    no
C39 . C40 . C41 . 112.2(8)    yes
C39 . C40 . H401 . 108.9    no
C41 . C40 . H401 . 108.0    no
C39 . C40 . H402 . 109.3    no
C41 . C40 . H402 . 109.0    no
H401 . C40 . H402 . 109.3    no
C40 . C41 . N42 . 113.9(7)    yes
C40 . C41 . H411 . 108.7    no
N42 . C41 . H411 . 108.8    no
C40 . C41 . H412 . 108.1    no
N42 . C41 . H412 . 108.1    no
H411 . C41 . H412 . 109.2    no
C41 . N42 . C27 . 130.1(7)    yes
C41 . N42 . C43 . 116.2(7)    yes
C27 . N42 . C43 . 111.0(7)    yes
N42 . C43 . C44 . 118.4(7)    yes
N42 . C43 . C49 . 118.8(8)    yes
C44 . C43 . C49 . 122.8(8)    yes
C43 . C44 . C45 . 119.5(8)    yes
C43 . C44 . C46 . 116.3(8)    yes
C45 . C44 . C46 . 123.7(9)    yes
Ir1 . C45 . C44 . 81.8(5)    yes
Ir1 . C45 . H451 . 115.1    no
C44 . C45 . H451 . 116.4    no
Ir1 . C45 . H452 . 116.3    no
C44 . C45 . H452 . 115.5    no
H451 . C45 . H452 . 109.5    no
C44 . C46 . C47 . 123.5(9)    yes
C44 . C46 . H461 . 118.1    no
C47 . C46 . H461 . 118.4    no
C46 . C47 . C48 . 118.5(9)    yes
C46 . C47 . C51 . 122.5(10)    yes
C48 . C47 . C51 . 119.1(10)    yes
C47 . C48 . C49 . 121.2(9)    yes
C47 . C48 . H481 . 119.8    no
C49 . C48 . H481 . 119.0    no
C48 . C49 . C43 . 117.7(9)    yes
C48 . C49 . C50 . 120.5(9)    yes
C43 . C49 . C50 . 121.8(9)    yes
C49 . C50 . H502 . 109.3    no
C49 . C50 . H501 . 109.2    no
H502 . C50 . H501 . 109.5    no
C49 . C50 . H503 . 109.7    no
H502 . C50 . H503 . 109.6    no
H501 . C50 . H503 . 109.5    no
C47 . C51 . H512 . 110.3    no
C47 . C51 . H511 . 109.8    no
H512 . C51 . H511 . 109.3    no
C47 . C51 . H513 . 109.3    no
H512 . C51 . H513 . 109.2    no
H511 . C51 . H513 . 109.1    no
C62 6_655 Ir52 . C53 6_655 80.6(4)    yes
C62 6_655 Ir52 . C53 . 99.9(4)    yes
C53 6_655 Ir52 . C53 . 177.2(5)    yes
C62 6_655 Ir52 . C62 . 161.8(6)    yes
C53 6_655 Ir52 . C62 . 99.9(4)    yes
C53 . Ir52 . C62 . 80.6(4)    yes
C62 6_655 Ir52 . H521 . 99.1    no
C53 6_655 Ir52 . H521 . 88.6    no
C53 . Ir52 . H521 . 88.6    no
C62 . Ir52 . H521 . 99.1    no
Ir52 . C53 . N54 . 128.1(6)    yes
Ir52 . C53 . N59 . 116.6(6)    yes
N54 . C53 . N59 . 115.3(7)    yes
C53 . N54 . C55 . 123.6(8)    yes
C53 . N54 . C69 . 120.3(7)    yes
C55 . N54 . C69 . 115.7(7)    yes
N54 . C55 . C56 . 113.3(8)    yes
N54 . C55 . H551 . 108.6    no
C56 . C55 . H551 . 109.3    no
N54 . C55 . H552 . 108.3    no
C56 . C55 . H552 . 108.1    no
H551 . C55 . H552 . 109.3    no
C55 . C56 . C57 . 110.5(8)    yes
C55 . C56 . H562 . 108.8    no
C57 . C56 . H562 . 109.4    no
C55 . C56 . H561 . 109.1    no
C57 . C56 . H561 . 109.4    no
H562 . C56 . H561 . 109.6    no
C56 . C57 . C58 . 111.8(9)    yes
C56 . C57 . H572 . 108.8    no
C58 . C57 . H572 . 108.9    no
C56 . C57 . H571 . 108.8    no
C58 . C57 . H571 . 109.1    no
H572 . C57 . H571 . 109.4    no
C57 . C58 . N59 . 115.3(7)    yes
C57 . C58 . H582 . 107.3    no
N59 . C58 . H582 . 107.8    no
C57 . C58 . H581 . 108.5    no
N59 . C58 . H581 . 108.4    no
H582 . C58 . H581 . 109.5    no
C58 . N59 . C53 . 128.9(7)    yes
C58 . N59 . C60 . 112.0(7)    yes
C53 . N59 . C60 . 115.1(7)    yes
N59 . C60 . C61 . 117.2(8)    yes
N59 . C60 . C66 . 119.0(8)    yes
C61 . C60 . C66 . 123.8(9)    yes
C60 . C61 . C62 . 119.6(9)    yes
C60 . C61 . C63 . 114.7(10)    yes
C62 . C61 . C63 . 125.4(9)    yes
Ir52 . C62 . C61 . 92.5(6)    yes
Ir52 . C62 . H621 . 113.8    no
C61 . C62 . H621 . 113.6    no
Ir52 . C62 . H622 . 112.8    no
C61 . C62 . H622 . 113.7    no
H621 . C62 . H622 . 109.7    no
C61 . C63 . C64 . 122.5(10)    yes
C61 . C63 . H631 . 118.4    no
C64 . C63 . H631 . 119.0    no
C63 . C64 . C65 . 120.2(11)    yes
C63 . C64 . C68 . 120.6(12)    yes
C65 . C64 . C68 . 119.1(12)    yes
C64 . C65 . C66 . 121.6(11)    yes
C64 . C65 . H651 . 119.4    no
C66 . C65 . H651 . 118.9    no
C65 . C66 . C60 . 117.1(10)    yes
C65 . C66 . C67 . 120.7(10)    yes
C60 . C66 . C67 . 122.2(9)    yes
C66 . C67 . H671 . 110.0    no
C66 . C67 . H672 . 110.0    no
H671 . C67 . H672 . 109.0    no
C66 . C67 . H673 . 109.8    no
H671 . C67 . H673 . 108.8    no
H672 . C67 . H673 . 109.3    no
C64 . C68 . H681 . 109.4    no
C64 . C68 . H682 . 110.0    no
H681 . C68 . H682 . 109.0    no
C64 . C68 . H683 . 109.7    no
H681 . C68 . H683 . 109.4    no
H682 . C68 . H683 . 109.3    no
N54 . C69 . C70 . 119.2(8)    yes
N54 . C69 . C74 . 119.5(8)    yes
C70 . C69 . C74 . 121.3(8)    yes
C69 . C70 . C71 . 118.3(9)    yes
C69 . C70 . C77 . 123.2(9)    yes
C71 . C70 . C77 . 118.5(9)    yes
C70 . C71 . C72 . 121.7(9)    yes
C70 . C71 . H711 . 119.1    no
C72 . C71 . H711 . 119.2    no
C71 . C72 . C73 . 117.7(9)    yes
C71 . C72 . C76 . 121.0(9)    yes
C73 . C72 . C76 . 121.2(9)    yes
C72 . C73 . C74 . 122.6(9)    yes
C72 . C73 . H731 . 119.0    no
C74 . C73 . H731 . 118.4    no
C69 . C74 . C73 . 118.4(8)    yes
C69 . C74 . C75 . 122.3(8)    yes
C73 . C74 . C75 . 119.3(8)    yes
C74 . C75 . H751 . 109.9    no
C74 . C75 . H752 . 109.9    no
H751 . C75 . H752 . 109.2    no
C74 . C75 . H753 . 109.7    no
H751 . C75 . H753 . 109.1    no
H752 . C75 . H753 . 109.1    no
C72 . C76 . H761 . 109.5    no
C72 . C76 . H763 . 109.9    no
H761 . C76 . H763 . 109.4    no
C72 . C76 . H762 . 110.0    no
H761 . C76 . H762 . 108.8    no
H763 . C76 . H762 . 109.2    no
C70 . C77 . H773 . 110.1    no
C70 . C77 . H772 . 109.7    no
H773 . C77 . H772 . 109.4    no
C70 . C77 . H771 . 109.4    no
H773 . C77 . H771 . 109.4    no
H772 . C77 . H771 . 108.9    no


_iucr_refine_instruction_details_constraints
;
#
# Punched on 22/08/12 at 16:40:51
#
#LIST     12                                                                    
BLOCK SCALE X'S, U'S 
CONT EXTPARAM 
RIDE IR  (   1,X'S) H   (  11,X'S) 
RIDE C   (   6,X'S) H   (  62,X'S) H   (  63,X'S) H   (  61,X'S) 
RIDE C   (   7,X'S) H   (  71,X'S) 
RIDE C   (   9,X'S) H   (  91,X'S) 
RIDE C   (  11,X'S) H   ( 112,X'S) H   ( 113,X'S) H   ( 111,X'S) 
RIDE C   (  12,X'S) H   ( 123,X'S) H   ( 121,X'S) H   ( 122,X'S) 
RIDE C   (  13,X'S) H   ( 132,X'S) H   ( 131,X'S) 
RIDE C   (  14,X'S) H   ( 142,X'S) H   ( 141,X'S) 
RIDE C   (  15,X'S) H   ( 151,X'S) H   ( 152,X'S) 
RIDE C   (  16,X'S) H   ( 161,X'S) H   ( 162,X'S) 
RIDE C   (  20,X'S) H   ( 201,X'S) H   ( 202,X'S) 
RIDE C   (  21,X'S) H   ( 211,X'S) 
RIDE C   (  23,X'S) H   ( 231,X'S) 
RIDE C   (  25,X'S) H   ( 252,X'S) H   ( 253,X'S) H   ( 251,X'S) 
RIDE C   (  26,X'S) H   ( 263,X'S) H   ( 261,X'S) H   ( 262,X'S) 
RIDE C   (  31,X'S) H   ( 312,X'S) H   ( 311,X'S) H   ( 313,X'S) 
RIDE C   (  32,X'S) H   ( 321,X'S) 
RIDE C   (  34,X'S) H   ( 341,X'S) 
RIDE C   (  36,X'S) H   ( 362,X'S) H   ( 361,X'S) H   ( 363,X'S) 
RIDE C   (  37,X'S) H   ( 372,X'S) H   ( 371,X'S) H   ( 373,X'S) 
RIDE C   (  38,X'S) H   ( 381,X'S) H   ( 382,X'S) 
RIDE C   (  39,X'S) H   ( 391,X'S) H   ( 392,X'S) 
RIDE C   (  40,X'S) H   ( 401,X'S) H   ( 402,X'S) 
RIDE C   (  41,X'S) H   ( 411,X'S) H   ( 412,X'S) 
RIDE C   (  45,X'S) H   ( 451,X'S) H   ( 452,X'S) 
RIDE C   (  46,X'S) H   ( 461,X'S) 
RIDE C   (  48,X'S) H   ( 481,X'S) 
RIDE C   (  50,X'S) H   ( 502,X'S) H   ( 501,X'S) H   ( 503,X'S) 
RIDE C   (  51,X'S) H   ( 512,X'S) H   ( 511,X'S) H   ( 513,X'S) 
RIDE IR  (  52,X'S) H   ( 521,X'S) 
RIDE C   (  55,X'S) H   ( 551,X'S) H   ( 552,X'S) 
RIDE C   (  56,X'S) H   ( 562,X'S) H   ( 561,X'S) 
RIDE C   (  57,X'S) H   ( 572,X'S) H   ( 571,X'S) 
RIDE C   (  58,X'S) H   ( 582,X'S) H   ( 581,X'S) 
RIDE C   (  62,X'S) H   ( 621,X'S) H   ( 622,X'S) 
RIDE C   (  63,X'S) H   ( 631,X'S) 
RIDE C   (  65,X'S) H   ( 651,X'S) 
RIDE C   (  67,X'S) H   ( 671,X'S) H   ( 672,X'S) H   ( 673,X'S) 
RIDE C   (  68,X'S) H   ( 681,X'S) H   ( 682,X'S) H   ( 683,X'S) 
RIDE C   (  71,X'S) H   ( 711,X'S) 
RIDE C   (  73,X'S) H   ( 731,X'S) 
RIDE C   (  75,X'S) H   ( 751,X'S) H   ( 752,X'S) H   ( 753,X'S) 
RIDE C   (  76,X'S) H   ( 761,X'S) H   ( 763,X'S) H   ( 762,X'S) 
RIDE C   (  77,X'S) H   ( 773,X'S) H   ( 772,X'S) H   ( 771,X'S) 
END                                                                             
;


_iucr_refine_instruction_details_restraints
;
#
# Punched on 22/08/12 at 16:40:51
#
#LIST     16                                                                    
NO 
REM   HREST   START (DO NOT REMOVE THIS LINE) 
REM   HREST   END (DO NOT REMOVE THIS LINE) 
END                                                                             
;
#==============================================================================
data_2a
#==============================================================================
_audit_creation_date        "12-09-06"
_audit_creation_method CRYSTALS_ver_14.23

_oxford_structure_analysis_title  '069npmk11'
_chemical_name_systematic         .
_chemical_melting_point           .

_cell_length_a                    15.1100(3)
_cell_length_b                    17.1158(4)
_cell_length_c                    17.3974(4)
_cell_angle_alpha                 63.004(2)
_cell_angle_beta                  66.1775(19)
_cell_angle_gamma                 75.0989(19)
_cell_volume                      3652.43(16)
 
_symmetry_cell_setting            'triclinic' 
_symmetry_space_group_name_H-M    'P -1 ' 
_symmetry_space_group_name_Hall   '-P 1'
loop_
 _symmetry_equiv_pos_as_xyz
 'x,y,z'
 '-x,-y,-z'

loop_
_atom_type_symbol
_atom_type_scat_dispersion_real
_atom_type_scat_dispersion_imag
_atom_type_scat_Cromer_Mann_a1
_atom_type_scat_Cromer_Mann_b1
_atom_type_scat_Cromer_Mann_a2
_atom_type_scat_Cromer_Mann_b2
_atom_type_scat_Cromer_Mann_a3
_atom_type_scat_Cromer_Mann_b3
_atom_type_scat_Cromer_Mann_a4
_atom_type_scat_Cromer_Mann_b4
_atom_type_scat_Cromer_Mann_c
_atom_type_scat_source  
 Ir     -4.7710   6.5667  27.3049   1.5928  16.7296   8.8655  15.6115   0.4179
   5.8338  45.0011  11.4722 'International Tables Vol C 4.2.6.8 and 6.1.1.4'
 C       0.0181   0.0091   2.3100  20.8439   1.0200  10.2075   1.5886   0.5687
   0.8650  51.6512   0.2156 'International Tables Vol C 4.2.6.8 and 6.1.1.4'
 H       0.0000   0.0000   0.4930  10.5109   0.3229  26.1257   0.1402   3.1424
   0.0408  57.7998   0.0030 'International Tables Vol C 4.2.6.8 and 6.1.1.4'
 N       0.0311   0.0180  12.2126   0.0057   3.1322   9.8933   2.0125  28.9975
   1.1663   0.5826 -11.5290 'International Tables Vol C 4.2.6.8 and 6.1.1.4'
 B       0.0090   0.0039   2.0545  23.2185   1.3326   1.0210   1.0979  60.3498
   0.7068   0.1403  -0.1932 'International Tables Vol C 4.2.6.8 and 6.1.1.4'
 F       0.0727   0.0534   3.5392  10.2825   2.6412   4.2944   1.5170   0.2615
   1.0243  26.1476   0.2776 'International Tables Vol C 4.2.6.8 and 6.1.1.4'
 Cl      0.3639   0.7018  11.4604   0.0104   7.1964   1.1662   6.2556  18.5194
   1.6455  47.7784  -9.5574 'International Tables Vol C 4.2.6.8 and 6.1.1.4'
 
 
_cell_formula_units_Z                    2

# Given Formula = C77 H78 B1 Cl2 F24 Ir1 N4 
# Dc =      1.63 Fooo =   1700.00 Mu =     51.77 M =   1789.38
# Found Formula = C76 H68 B1 F24.00 Ir1 N4 
# Dc =      1.54 FOOO =   1700.00 Mu =     44.88 M =   1696.38

_chemical_formula_sum             'C76 H68 B1 F24 Ir1 N4'
_chemical_formula_moiety          'C32 H12 B F24, C44 H56 Ir1 N4'
_chemical_compound_source                .
_chemical_formula_weight           1696.38
 
 
_cell_measurement_reflns_used        29483
_cell_measurement_theta_min              3
_cell_measurement_theta_max             76
_cell_measurement_temperature          150
 
_exptl_crystal_description        'block' 
_exptl_crystal_colour             'orange' 
_exptl_crystal_size_min           0.110 
_exptl_crystal_size_mid           0.140 
_exptl_crystal_size_max           0.220 
 
_exptl_crystal_density_diffrn     1.542 
_exptl_crystal_density_meas       . 
_exptl_crystal_density_method     'not measured' 
# Non-dispersive F(000): 
_exptl_crystal_F_000              1700 
_exptl_absorpt_coefficient_mu     4.488 
 
# Sheldrick geometric approximatio 0.53 0.61 
_exptl_absorpt_correction_type    multi-scan 
_exptl_absorpt_process_details    'CrysAlis, (Oxford Diffraction, 2002)' 
_exptl_absorpt_correction_T_min   0.43 
_exptl_absorpt_correction_T_max   0.61 
_diffrn_measurement_device_type   'Oxford Diffraction SuperNova' 
_diffrn_measurement_device        'Area' 
_diffrn_radiation_monochromator   'graphite' 
_diffrn_radiation_type            'Cu K\a'
_diffrn_radiation_wavelength           1.54180
_diffrn_measurement_method        \w 
 
# If a reference occurs more than once, delete the author 
# and date from subsequent references. 
_computing_data_collection        'SuperNova, (Oxford Diffraction, 2010)' 
_computing_cell_refinement        'CrysAlis, (Oxford Diffraction, 2002)' 
_computing_data_reduction         'CrysAlis, (Oxford Diffraction, 2002)' 
_computing_structure_solution     'Superflip (Palatinus & Chapuis, 2007)' 
_computing_structure_refinement   'CRYSTALS (Betteridge et al., 2003)' 
_computing_publication_material   'CRYSTALS (Betteridge et al., 2003)' 
_computing_molecular_graphics     'CAMERON (Watkin et al., 1996)' 
 
_diffrn_standards_interval_time   . 
_diffrn_standards_interval_count  . 
_diffrn_standards_number          0 
_diffrn_standards_decay_%         . 
 
_diffrn_ambient_temperature        150
_diffrn_reflns_number             38689 
_reflns_number_total              15191 
_diffrn_reflns_av_R_equivalents   0.028 
# Number of reflections without Friedels Law is 0 
# Number of reflections with Friedels Law is 15191 
# Theoretical number of reflections is about 30718 
 
 
_diffrn_reflns_theta_min          3.210 
_diffrn_reflns_theta_max          76.541 
_diffrn_measured_fraction_theta_max 0.989 
 
_diffrn_reflns_theta_full         74.245 
_diffrn_measured_fraction_theta_full 0.998 
 
 
_diffrn_reflns_limit_h_min        -18 
_diffrn_reflns_limit_h_max        19 
_diffrn_reflns_limit_k_min        -21 
_diffrn_reflns_limit_k_max        18 
_diffrn_reflns_limit_l_min        -21 
_diffrn_reflns_limit_l_max        21 
_reflns_limit_h_min               -17 
_reflns_limit_h_max               19 
_reflns_limit_k_min               -18 
_reflns_limit_k_max               21 
_reflns_limit_l_min               0 
_reflns_limit_l_max               21 
 
_oxford_diffrn_Wilson_B_factor    1.78 
_oxford_diffrn_Wilson_scale       0.16 
 
_atom_sites_solution_primary      Other  #heavy,direct,difmap,geom
# _atom_sites_solution_secondary  difmap
_atom_sites_solution_hydrogens    difmap
 
_refine_diff_density_min          -1.55 
_refine_diff_density_max          2.36 
 
 
# The current dictionary definitions do not cover the 
# situation where the reflections used for refinement were 
# selected by a user-defined sigma threshold 
 
 
# The values actually used during refinement 
_oxford_reflns_threshold_expression_ref     I>-3.0\s(I)
_refine_ls_number_reflns          15132 
_refine_ls_number_restraints      810 
_refine_ls_number_parameters      1095 
_oxford_refine_ls_R_factor_ref    0.0351 
_refine_ls_wR_factor_ref          0.0829 
_refine_ls_goodness_of_fit_ref    0.9077 
_refine_ls_shift/su_max           0.0164645 
_refine_ls_shift/su_mean          0.0002554 
 
 
# The values computed from all data 
_oxford_reflns_number_all         15132 
_refine_ls_R_factor_all           0.0351 
_refine_ls_wR_factor_all          0.0829 
 
# The values computed with a 2 sigma cutoff - a la SHELX 
_reflns_threshold_expression      I>2.0\s(I)
_reflns_number_gt                 14369 
_refine_ls_R_factor_gt            0.0333 
_refine_ls_wR_factor_gt           0.0808 
 
# choose from: rm (reference molecule of known chirality), 
# ad (anomolous dispersion - Flack), rmad (rm and ad), 
# syn (from synthesis), unk (unknown) or . (not applicable). 
_chemical_absolute_configuration  '.' 
 
 
_refine_ls_structure_factor_coef  Fsqd 
_refine_ls_matrix_type            full
_refine_ls_hydrogen_treatment     constr         # none, undef, noref, refall,
                                                 # refxyz, refU, constr or mixed
_refine_ls_weighting_scheme       calc 
_refine_ls_weighting_details 
;
 Method= Modified Sheldrick 
 w=1/[\s^2^(F^2^) + ( 0.04P)^2^ + 9.68P] 
 ,where P=(max(Fo^2^,0) + 2Fc^2^)/3 
;
# Insert your own references if required - in alphabetical order 
_publ_section_references 
; 
Oxford Diffraction, (2010). CrysAlisPro. 
 
Oxford Diffraction, (2010). Supernova User Manual. 
 
Betteridge, P.W., Carruthers, J.R., Cooper, R.I., 
Prout, K. & Watkin, D.J. (2003). J. Appl. Cryst. 36, 1487. 
 
Watkin, D.J., Prout, C.K. & Pearce, L.J. (1996). CAMERON, Chemical 
Crystallography Laboratory, Oxford, UK. 
 
Palatinus, L. & Chapuis, G. (2007). J. Appl. Cryst. 40, 786-790. 
; 

# Uequiv = arithmetic mean of Ui i.e. Ueqiv = (U1+U2+U3)/3

# Replace last . with number of unfound hydrogen atoms attached to an atom.

# ..._refinement_flags_... 
# . no refinement constraints           S special position constraint on site
# G rigid group refinement of site      R riding atom
# D distance or angle restraint on site T thermal displacement constraints
# U Uiso or Uij restraint (rigid bond)  P partial occupancy constraint


loop_
_atom_site_label
_atom_site_type_symbol
_atom_site_fract_x
_atom_site_fract_y
_atom_site_fract_z
_atom_site_U_iso_or_equiv
_atom_site_occupancy
_atom_site_adp_type
_atom_site_refinement_flags_posn
_atom_site_refinement_flags_adp
_atom_site_refinement_flags_occupancy
_atom_site_disorder_assembly
_atom_site_disorder_group
_atom_site_attached_hydrogens
Ir1 Ir 0.543713(8) 0.610294(7) 0.168530(8) 0.0205 1.0000 Uani . . . . . . 
C2 C 0.4769(2) 0.7233(2) 0.0946(2) 0.0238 1.0000 Uani . . . . . . 
N3 N 0.50149(19) 0.80594(16) 0.05464(18) 0.0253 1.0000 Uani . . . . . . 
C4 C 0.4666(3) 0.8778(2) -0.0184(2) 0.0334 1.0000 Uani . . . . . . 
C5 C 0.4383(3) 0.8408(2) -0.0677(2) 0.0357 1.0000 Uani . . . . . . 
C6 C 0.3668(3) 0.7735(2) 0.0017(3) 0.0340 1.0000 Uani . . . . . . 
N7 N 0.40849(19) 0.70798(16) 0.07229(19) 0.0258 1.0000 Uani . . . . . . 
C8 C 0.3936(2) 0.6170(2) 0.1064(2) 0.0275 1.0000 Uani . . . . . . 
C9 C 0.4764(2) 0.5572(2) 0.0928(2) 0.0283 1.0000 Uani . . . . . . 
C10 C 0.5748(2) 0.5878(2) 0.0529(2) 0.0289 1.0000 Uani . . . . . . 
C11 C 0.4610(3) 0.4683(2) 0.1236(2) 0.0333 1.0000 Uani . . . . . . 
H11 H 0.6251 0.6570 0.1519 0.0340 1.0000 Uiso R . . . . . 
C12 C 0.3690(3) 0.4410(2) 0.1630(3) 0.0340 1.0000 Uani . . . . . . 
C13 C 0.3517(3) 0.3465(2) 0.1949(3) 0.0451 1.0000 Uani . . . . . . 
C14 C 0.2893(3) 0.5026(2) 0.1761(3) 0.0347 1.0000 Uani . . . . . . 
C15 C 0.2998(2) 0.5903(2) 0.1497(3) 0.0320 1.0000 Uani . . . . . . 
C16 C 0.2115(3) 0.6525(2) 0.1707(3) 0.0441 1.0000 Uani . . . . . . 
C17 C 0.5650(2) 0.83185(19) 0.0804(2) 0.0249 1.0000 Uani . . . . . . 
C18 C 0.6660(2) 0.8214(2) 0.0386(2) 0.0280 1.0000 Uani . . . . . . 
C19 C 0.7243(2) 0.8497(2) 0.0644(2) 0.0314 1.0000 Uani . . . . . . 
C20 C 0.6857(3) 0.8910(2) 0.1249(2) 0.0306 1.0000 Uani . . . . . . 
C21 C 0.5853(2) 0.9038(2) 0.1617(2) 0.0283 1.0000 Uani . . . . . . 
C22 C 0.5234(2) 0.87480(19) 0.1402(2) 0.0258 1.0000 Uani . . . . . . 
C23 C 0.4150(2) 0.8928(2) 0.1784(3) 0.0330 1.0000 Uani . . . . . . 
C24 C 0.7507(3) 0.9258(3) 0.1467(3) 0.0421 1.0000 Uani . . . . . . 
C25 C 0.7106(3) 0.7829(2) -0.0322(2) 0.0360 1.0000 Uani . . . . . . 
C26 C 0.6201(2) 0.50379(19) 0.2407(2) 0.0243 1.0000 Uani . . . . . . 
N27 N 0.70851(19) 0.46153(17) 0.21870(19) 0.0278 1.0000 Uani . . . . . . 
C28 C 0.7502(3) 0.3947(3) 0.2895(3) 0.0453 1.0000 Uani . . . . . . 
C29 C 0.6764(4) 0.3571(4) 0.3785(3) 0.0697 1.0000 Uani . . . . . . 
C30 C 0.6015(3) 0.4233(2) 0.4071(2) 0.0346 1.0000 Uani . . . . . . 
N31 N 0.56876(19) 0.48337(17) 0.32908(19) 0.0279 1.0000 Uani . . . . . . 
C32 C 0.4819(2) 0.5429(2) 0.3404(2) 0.0279 1.0000 Uani . . . . . . 
C33 C 0.4896(2) 0.6267(2) 0.3331(2) 0.0308 1.0000 Uani . . . . . . 
C34 C 0.5818(3) 0.6536(2) 0.3239(3) 0.0361 1.0000 Uani . . . . . . 
C35 C 0.4025(3) 0.6809(2) 0.3501(3) 0.0371 1.0000 Uani . . . . . . 
C36 C 0.3135(3) 0.6542(2) 0.3744(3) 0.0394 1.0000 Uani . . . . . . 
C37 C 0.2215(3) 0.7136(3) 0.3947(3) 0.0576 1.0000 Uani . . . . . . 
C38 C 0.3087(3) 0.5702(3) 0.3821(3) 0.0387 1.0000 Uani . . . . . . 
C39 C 0.3913(2) 0.5132(2) 0.3661(2) 0.0325 1.0000 Uani . . . . . . 
C40 C 0.3848(3) 0.4221(3) 0.3769(3) 0.0433 1.0000 Uani . . . . . . 
C41 C 0.7714(2) 0.4839(2) 0.1250(2) 0.0276 1.0000 Uani . . . . . . 
H41 H 0.5191 0.9153 -0.0618 0.0399 1.0000 Uiso R . . . . . 
C42 C 0.8288(2) 0.5540(2) 0.0826(2) 0.0293 1.0000 Uani . . . . . . 
H42 H 0.4117 0.9125 0.0068 0.0397 1.0000 Uiso R . . . . . 
C43 C 0.8875(2) 0.5742(3) -0.0081(3) 0.0369 1.0000 Uani . . . . . . 
C44 C 0.8914(3) 0.5266(3) -0.0566(3) 0.0419 1.0000 Uani . . . . . . 
C45 C 0.8369(3) 0.4552(3) -0.0111(3) 0.0416 1.0000 Uani . . . . . . 
C46 C 0.7761(3) 0.4324(2) 0.0801(3) 0.0350 1.0000 Uani . . . . . . 
C47 C 0.7186(3) 0.3540(3) 0.1267(4) 0.0535 1.0000 Uani . . . . . . 
C48 C 0.9534(3) 0.5528(4) -0.1559(3) 0.0625 1.0000 Uani . . . . . . 
C49 C 0.8290(3) 0.6058(3) 0.1326(3) 0.0367 1.0000 Uani . . . . . . 
F50 F 0.4443(3) 0.8646(2) 0.37021(19) 0.0762 1.0000 Uani . . . . . . 
C51 C 0.4650(2) 0.8569(2) 0.4409(2) 0.0312 1.0000 Uani . . . . . . 
H51 H 0.4091 0.8881 -0.1097 0.0430 1.0000 Uiso R . . . . . 
F52 F 0.37904(16) 0.86874(16) 0.50030(18) 0.0480 1.0000 Uani . . . . . . 
H52 H 0.4956 0.8130 -0.1016 0.0429 1.0000 Uiso R . . . . . 
F53 F 0.49754(18) 0.77341(15) 0.4793(2) 0.0638 1.0000 Uani . . . . . . 
C54 C 0.5346(2) 0.9212(2) 0.4133(2) 0.0253 1.0000 Uani . . . . . . 
C55 C 0.5027(2) 1.0099(2) 0.3846(2) 0.0273 1.0000 Uani . . . . . . 
C56 C 0.5673(2) 1.0692(2) 0.3577(2) 0.0260 1.0000 Uani . . . . . . 
C57 C 0.5369(2) 1.1658(2) 0.3207(2) 0.0308 1.0000 Uani . . . . . . 
F58 F 0.5536(2) 1.19886(15) 0.23105(16) 0.0509 1.0000 Uani . . . . . . 
F59 F 0.44328(18) 1.18573(16) 0.3604(2) 0.0625 1.0000 Uani . . . . . . 
F60 F 0.5847(2) 1.21389(14) 0.3312(2) 0.0576 1.0000 Uani . . . . . . 
C61 C 0.6614(2) 1.0402(2) 0.3601(2) 0.0242 1.0000 Uani . . . . . . 
H61 H 0.3056 0.8026 0.0295 0.0410 1.0000 Uiso R . . . . . 
C62 C 0.6964(2) 0.95094(19) 0.3866(2) 0.0227 1.0000 Uani . . . . . . 
H62 H 0.3552 0.7427 -0.0279 0.0410 1.0000 Uiso R . . . . . 
C63 C 0.6297(2) 0.89216(19) 0.4137(2) 0.0242 1.0000 Uani . . . . . . 
B64 B 0.8092(2) 0.9223(2) 0.3850(2) 0.0219 1.0000 Uani . . . . . . 
C65 C 0.8870(2) 0.96624(19) 0.2812(2) 0.0225 1.0000 Uani . . . . . . 
C66 C 0.8657(2) 1.0327(2) 0.2046(2) 0.0246 1.0000 Uani . . . . . . 
C67 C 0.9374(2) 1.0664(2) 0.1197(2) 0.0267 1.0000 Uani . . . . . . 
C68 C 1.0338(2) 1.0338(2) 0.1074(2) 0.0292 1.0000 Uani . . . . . . 
C69 C 1.0566(2) 0.9683(2) 0.1823(2) 0.0295 1.0000 Uani . . . . . . 
C70 C 0.9855(2) 0.9357(2) 0.2667(2) 0.0274 1.0000 Uani . . . . . . 
C71 C 1.15917(14) 0.92934(18) 0.17398(19) 0.0441 1.0000 Uani D . . . . . 
C75 C 0.9115(2) 1.13891(17) 0.04024(17) 0.0446 1.0000 Uani D . . . . . 
C79 C 0.8369(2) 0.81543(19) 0.4158(2) 0.0229 1.0000 Uani . . . . . . 
C80 C 0.8320(2) 0.7764(2) 0.3621(2) 0.0281 1.0000 Uani . . . . . . 
C81 C 0.8606(2) 0.6879(2) 0.3788(3) 0.0314 1.0000 Uani . . . . . . 
C82 C 0.8959(3) 0.6339(2) 0.4502(3) 0.0333 1.0000 Uani . . . . . . 
C83 C 0.9016(3) 0.6707(2) 0.5038(2) 0.0319 1.0000 Uani . . . . . . 
C84 C 0.8737(2) 0.7597(2) 0.4870(2) 0.0266 1.0000 Uani . . . . . . 
C85 C 0.9416(2) 0.61316(16) 0.57891(17) 0.0512 1.0000 Uani D . . . . . 
C89 C 0.8559(2) 0.64890(18) 0.3194(2) 0.0508 1.0000 Uani D . . . . . 
C93 C 0.8214(2) 0.95906(19) 0.4518(2) 0.0232 1.0000 Uani . . . . . . 
C94 C 0.7764(2) 0.92129(19) 0.5471(2) 0.0246 1.0000 Uani . . . . . . 
C95 C 0.7845(2) 0.9526(2) 0.6048(2) 0.0281 1.0000 Uani . . . . . . 
C96 C 0.8347(2) 1.0254(2) 0.5702(2) 0.0298 1.0000 Uani . . . . . . 
C97 C 0.8771(2) 1.0653(2) 0.4766(2) 0.0276 1.0000 Uani . . . . . . 
C98 C 0.8716(2) 1.0325(2) 0.4185(2) 0.0251 1.0000 Uani . . . . . . 
C99 C 0.9275(3) 1.1472(2) 0.4354(3) 0.0347 1.0000 Uani . . . . . . 
F100 F 0.8697(2) 1.21961(15) 0.4098(2) 0.0624 1.0000 Uani . . . . . . 
F101 F 0.9582(2) 1.15410(18) 0.4938(2) 0.0662 1.0000 Uani . . . . . . 
H101 H 0.5852 0.6403 -0.0036 0.0351 1.0000 Uiso R . . . . . 
F102 F 1.0054(2) 1.15142(18) 0.3625(2) 0.0629 1.0000 Uani . . . . . . 
H102 H 0.6282 0.5426 0.0454 0.0352 1.0000 Uiso R . . . . . 
C103 C 0.7407(2) 0.90524(18) 0.70555(13) 0.0435 1.0000 Uani D . . . . . 
H111 H 0.5159 0.4273 0.1157 0.0400 1.0000 Uiso R . . . . . 
H131 H 0.3257 0.3206 0.2611 0.0676 1.0000 Uiso R . . . . . 
H132 H 0.4122 0.3132 0.1752 0.0679 1.0000 Uiso R . . . . . 
H133 H 0.3054 0.3434 0.1709 0.0677 1.0000 Uiso R . . . . . 
H141 H 0.2271 0.4842 0.2041 0.0422 1.0000 Uiso R . . . . . 
H161 H 0.2252 0.6908 0.1908 0.0658 1.0000 Uiso R . . . . . 
H162 H 0.1935 0.6883 0.1165 0.0658 1.0000 Uiso R . . . . . 
H163 H 0.1566 0.6205 0.2180 0.0659 1.0000 Uiso R . . . . . 
H191 H 0.7916 0.8407 0.0403 0.0381 1.0000 Uiso R . . . . . 
F200 F 0.7329(7) 0.9448(4) 0.7574(4) 0.0710 0.495(10) Uani D . P 1 1 . 
F201 F 0.7912(4) 0.8286(4) 0.7361(4) 0.0625 0.495(10) Uani D . P 1 1 . 
F202 F 0.6507(4) 0.8843(6) 0.7302(4) 0.0681 0.495(10) Uani D . P 1 1 . 
F203 F 0.6479(4) 0.9313(6) 0.7384(4) 0.0825 0.505(10) Uani D . P 1 2 . 
F204 F 0.7854(6) 0.9224(5) 0.7484(3) 0.0578 0.505(10) Uani D . P 1 2 . 
F205 F 0.7445(6) 0.8216(3) 0.7381(4) 0.0682 0.505(10) Uani D . P 1 2 . 
H211 H 0.5586 0.9318 0.2022 0.0342 1.0000 Uiso R . . . . . 
H231 H 0.3826 0.8447 0.1907 0.0499 1.0000 Uiso R . . . . . 
H232 H 0.3970 0.9009 0.2339 0.0499 1.0000 Uiso R . . . . . 
H233 H 0.3932 0.9452 0.1353 0.0498 1.0000 Uiso R . . . . . 
H241 H 0.7666 0.9830 0.1006 0.0627 1.0000 Uiso R . . . . . 
H242 H 0.8101 0.8883 0.1469 0.0627 1.0000 Uiso R . . . . . 
H243 H 0.7199 0.9292 0.2049 0.0629 1.0000 Uiso R . . . . . 
H251 H 0.7772 0.7964 -0.0663 0.0539 1.0000 Uiso R . . . . . 
H252 H 0.7084 0.7194 -0.0031 0.0546 1.0000 Uiso R . . . . . 
H253 H 0.6736 0.8058 -0.0733 0.0545 1.0000 Uiso R . . . . . 
H281 H 0.7908 0.3500 0.2684 0.0544 1.0000 Uiso R . . . . . 
H282 H 0.7895 0.4251 0.2993 0.0547 1.0000 Uiso R . . . . . 
H291 H 0.6418 0.3162 0.3742 0.0861 1.0000 Uiso R . . . . . 
H292 H 0.7089 0.3244 0.4259 0.0850 1.0000 Uiso R . . . . . 
F300 F 0.9788(4) 1.1919(4) -0.0178(4) 0.0818 0.480(8) Uani D . P 2 1 . 
F301 F 0.8335(5) 1.1895(4) 0.0625(4) 0.0748 0.480(8) Uani D . P 2 1 . 
H301 H 0.5466 0.3935 0.4575 0.0422 1.0000 Uiso R . . . . . 
F302 F 0.8943(7) 1.1065(4) -0.0080(5) 0.0683 0.480(8) Uani D . P 2 1 . 
H302 H 0.6284 0.4552 0.4252 0.0427 1.0000 Uiso R . . . . . 
F303 F 0.9549(5) 1.1291(4) -0.0370(3) 0.0812 0.520(8) Uani D . P 2 2 . 
F304 F 0.9353(6) 1.2151(3) 0.0248(5) 0.0726 0.520(8) Uani D . P 2 2 . 
F305 F 0.8196(3) 1.1513(4) 0.0514(4) 0.0760 0.520(8) Uani D . P 2 2 . 
H341 H 0.5910 0.7131 0.2797 0.0541 1.0000 Uiso R . . . . . 
H342 H 0.6364 0.6154 0.3043 0.0541 1.0000 Uiso R . . . . . 
H343 H 0.5774 0.6505 0.3816 0.0539 1.0000 Uiso R . . . . . 
H351 H 0.4060 0.7366 0.3461 0.0447 1.0000 Uiso R . . . . . 
H371 H 0.1815 0.7149 0.3629 0.0860 1.0000 Uiso R . . . . . 
H372 H 0.2370 0.7717 0.3752 0.0861 1.0000 Uiso R . . . . . 
H373 H 0.1873 0.6903 0.4592 0.0857 1.0000 Uiso R . . . . . 
H381 H 0.2485 0.5524 0.3977 0.0461 1.0000 Uiso R . . . . . 
F400 F 1.2238(3) 0.9780(4) 0.0986(3) 0.1100 0.765(11) Uani D . P 3 1 . 
F401 F 1.1757(4) 0.8507(3) 0.1724(4) 0.0632 0.765(11) Uani D . P 3 1 . 
H401 H 0.3208 0.4154 0.3839 0.0653 1.0000 Uiso R . . . . . 
F402 F 1.1839(3) 0.9197(3) 0.2436(3) 0.0483 0.765(11) Uani D . P 3 1 . 
H402 H 0.4307 0.4105 0.3253 0.0650 1.0000 Uiso R . . . . . 
F403 F 1.2130(8) 0.9505(9) 0.0867(5) 0.0596 0.235(11) Uani D . P 3 2 . 
H403 H 0.3999 0.3802 0.4306 0.0651 1.0000 Uiso R . . . . . 
F404 F 1.1657(8) 0.8426(4) 0.2121(9) 0.0603 0.235(11) Uani D . P 3 2 . 
F405 F 1.2040(8) 0.9534(10) 0.2088(11) 0.0577 0.235(11) Uani D . P 3 2 . 
H431 H 0.9259 0.6211 -0.0371 0.0442 1.0000 Uiso R . . . . . 
H451 H 0.8398 0.4211 -0.0413 0.0501 1.0000 Uiso R . . . . . 
H471 H 0.7536 0.3033 0.1600 0.0803 1.0000 Uiso R . . . . . 
H472 H 0.6570 0.3652 0.1683 0.0796 1.0000 Uiso R . . . . . 
H473 H 0.7087 0.3418 0.0822 0.0805 1.0000 Uiso R . . . . . 
H481 H 0.9614 0.5060 -0.1742 0.0939 1.0000 Uiso R . . . . . 
H482 H 0.9230 0.6041 -0.1932 0.0940 1.0000 Uiso R . . . . . 
H483 H 1.0162 0.5659 -0.1659 0.0939 1.0000 Uiso R . . . . . 
H491 H 0.8303 0.5672 0.1931 0.0553 1.0000 Uiso R . . . . . 
H492 H 0.8862 0.6370 0.1009 0.0552 1.0000 Uiso R . . . . . 
H493 H 0.7727 0.6472 0.1372 0.0550 1.0000 Uiso R . . . . . 
F500 F 0.8957(7) 0.6398(4) 0.6499(4) 0.0610 0.481(13) Uani D . P 4 1 . 
F501 F 1.0346(4) 0.6102(5) 0.5632(5) 0.0827 0.481(13) Uani D . P 4 1 . 
F502 F 0.9232(6) 0.5292(3) 0.6138(5) 0.0515 0.481(13) Uani D . P 4 1 . 
F503 F 0.9446(7) 0.6495(4) 0.6308(5) 0.0748 0.519(13) Uani D . P 4 2 . 
F504 F 1.0362(4) 0.5854(4) 0.5411(4) 0.0552 0.519(13) Uani D . P 4 2 . 
F505 F 0.8984(5) 0.5405(4) 0.6366(5) 0.0629 0.519(13) Uani D . P 4 2 . 
H551 H 0.4394 1.0291 0.3838 0.0327 1.0000 Uiso R . . . . . 
F600 F 0.9410(4) 0.6110(7) 0.2814(7) 0.0625 0.57(2) Uani D . P 5 1 . 
F601 F 0.8231(7) 0.7049(4) 0.2508(5) 0.0591 0.57(2) Uani D . P 5 1 . 
F602 F 0.7946(7) 0.5846(5) 0.3707(5) 0.0632 0.57(2) Uani D . P 5 1 . 
F603 F 0.9431(5) 0.6484(10) 0.2550(7) 0.0683 0.43(2) Uani D . P 5 2 . 
F604 F 0.7939(7) 0.6988(6) 0.2743(7) 0.0461 0.43(2) Uani D . P 5 2 . 
F605 F 0.8304(10) 0.5675(4) 0.3588(7) 0.0654 0.43(2) Uani D . P 5 2 . 
H611 H 0.7022 1.0819 0.3437 0.0292 1.0000 Uiso R . . . . . 
H631 H 0.6496 0.8322 0.4323 0.0285 1.0000 Uiso R . . . . . 
H661 H 0.8013 1.0552 0.2100 0.0301 1.0000 Uiso R . . . . . 
H681 H 1.0813 1.0557 0.0504 0.0346 1.0000 Uiso R . . . . . 
H701 H 1.0043 0.8914 0.3158 0.0328 1.0000 Uiso R . . . . . 
H801 H 0.8097 0.8120 0.3122 0.0337 1.0000 Uiso R . . . . . 
H821 H 0.9147 0.5744 0.4621 0.0402 1.0000 Uiso R . . . . . 
H841 H 0.8802 0.7821 0.5243 0.0318 1.0000 Uiso R . . . . . 
H941 H 0.7412 0.8742 0.5725 0.0301 1.0000 Uiso R . . . . . 
H961 H 0.8398 1.0466 0.6094 0.0361 1.0000 Uiso R . . . . . 
H981 H 0.9025 1.0599 0.3558 0.0302 1.0000 Uiso R . . . . . 
loop_
_atom_site_aniso_label
_atom_site_aniso_U_11
_atom_site_aniso_U_22
_atom_site_aniso_U_33
_atom_site_aniso_U_23
_atom_site_aniso_U_13
_atom_site_aniso_U_12
Ir1 0.02034(7) 0.01778(7) 0.02104(7) -0.00463(5) -0.00944(5) 0.00049(4) 
C2 0.0244(14) 0.0250(14) 0.0240(14) -0.0093(11) -0.0109(11) -0.0013(11) 
N3 0.0290(13) 0.0199(11) 0.0279(13) -0.0037(10) -0.0169(11) -0.0024(10) 
C4 0.0460(19) 0.0215(14) 0.0347(17) -0.0006(13) -0.0276(15) -0.0029(13) 
C5 0.052(2) 0.0275(16) 0.0339(17) -0.0054(14) -0.0297(16) -0.0014(14) 
C6 0.0419(19) 0.0242(15) 0.0414(19) -0.0051(14) -0.0303(16) 0.0003(13) 
N7 0.0288(13) 0.0199(12) 0.0314(13) -0.0061(10) -0.0192(11) 0.0007(10) 
C8 0.0339(16) 0.0210(14) 0.0310(16) -0.0072(12) -0.0184(13) -0.0010(12) 
C9 0.0327(16) 0.0266(15) 0.0293(15) -0.0104(12) -0.0170(13) 0.0015(12) 
C10 0.0297(16) 0.0324(16) 0.0271(15) -0.0130(13) -0.0129(12) 0.0011(12) 
C11 0.0415(18) 0.0249(15) 0.0371(18) -0.0124(13) -0.0216(15) 0.0058(13) 
C12 0.046(2) 0.0240(15) 0.0361(18) -0.0090(13) -0.0222(15) -0.0016(13) 
C13 0.062(3) 0.0251(17) 0.051(2) -0.0100(16) -0.027(2) -0.0047(16) 
C14 0.0346(17) 0.0264(16) 0.0435(19) -0.0069(14) -0.0197(15) -0.0056(13) 
C15 0.0301(16) 0.0269(15) 0.0412(18) -0.0100(14) -0.0196(14) 0.0000(12) 
C16 0.0301(18) 0.0329(18) 0.062(3) -0.0137(17) -0.0155(17) -0.0014(14) 
C17 0.0276(15) 0.0197(13) 0.0264(14) -0.0026(11) -0.0153(12) -0.0025(11) 
C18 0.0292(15) 0.0240(14) 0.0244(15) -0.0020(12) -0.0095(12) -0.0058(12) 
C19 0.0252(15) 0.0311(16) 0.0311(16) -0.0027(13) -0.0110(13) -0.0077(12) 
C20 0.0356(17) 0.0266(15) 0.0289(16) 0.0002(12) -0.0191(13) -0.0093(13) 
C21 0.0349(16) 0.0226(14) 0.0265(15) -0.0040(12) -0.0149(13) -0.0045(12) 
C22 0.0276(15) 0.0210(13) 0.0257(14) -0.0033(11) -0.0130(12) -0.0018(11) 
C23 0.0291(16) 0.0319(16) 0.0381(18) -0.0122(14) -0.0157(14) 0.0016(13) 
C24 0.044(2) 0.046(2) 0.041(2) -0.0085(17) -0.0234(17) -0.0146(17) 
C25 0.0357(18) 0.0384(18) 0.0265(16) -0.0089(14) -0.0057(13) -0.0073(14) 
C26 0.0249(14) 0.0192(13) 0.0273(15) -0.0073(11) -0.0102(12) -0.0005(11) 
N27 0.0244(12) 0.0236(12) 0.0287(13) -0.0077(11) -0.0107(11) 0.0062(10) 
C28 0.0383(19) 0.041(2) 0.0367(19) -0.0053(16) -0.0165(16) 0.0158(16) 
C29 0.058(3) 0.069(3) 0.046(3) -0.005(2) -0.021(2) 0.022(2) 
C30 0.0379(18) 0.0293(16) 0.0248(16) 0.0003(13) -0.0145(14) 0.0013(13) 
N31 0.0246(12) 0.0227(12) 0.0262(13) -0.0034(10) -0.0101(10) 0.0043(10) 
C32 0.0247(15) 0.0249(14) 0.0246(14) -0.0049(12) -0.0080(12) 0.0031(12) 
C33 0.0314(16) 0.0263(15) 0.0269(15) -0.0052(12) -0.0104(13) 0.0009(12) 
C34 0.0394(19) 0.0349(17) 0.0352(18) -0.0112(14) -0.0168(15) -0.0032(14) 
C35 0.0422(19) 0.0278(16) 0.0333(18) -0.0089(14) -0.0134(15) 0.0048(14) 
C36 0.0324(17) 0.0377(18) 0.0303(17) -0.0076(14) -0.0080(14) 0.0096(14) 
C37 0.039(2) 0.052(2) 0.054(3) -0.017(2) -0.0079(19) 0.0170(19) 
C38 0.0229(15) 0.0421(19) 0.0333(18) -0.0060(15) -0.0038(13) -0.0015(14) 
C39 0.0277(16) 0.0309(16) 0.0289(16) -0.0051(13) -0.0083(13) -0.0021(13) 
C40 0.040(2) 0.0354(19) 0.049(2) -0.0089(16) -0.0151(17) -0.0092(15) 
C41 0.0218(14) 0.0302(15) 0.0292(16) -0.0123(13) -0.0103(12) 0.0045(11) 
C42 0.0225(14) 0.0329(16) 0.0311(16) -0.0120(13) -0.0113(12) 0.0021(12) 
C43 0.0252(16) 0.045(2) 0.0333(18) -0.0109(15) -0.0089(13) -0.0015(14) 
C44 0.0269(16) 0.063(2) 0.0319(18) -0.0221(17) -0.0108(14) 0.0096(16) 
C45 0.0336(18) 0.057(2) 0.048(2) -0.0357(19) -0.0197(16) 0.0139(16) 
C46 0.0284(16) 0.0365(18) 0.047(2) -0.0229(16) -0.0174(15) 0.0057(13) 
C47 0.045(2) 0.043(2) 0.084(3) -0.038(2) -0.022(2) 0.0011(18) 
C48 0.044(2) 0.098(4) 0.035(2) -0.028(2) -0.0103(18) 0.008(2) 
C49 0.0313(17) 0.0417(19) 0.043(2) -0.0203(16) -0.0154(15) -0.0021(14) 
F50 0.095(2) 0.113(3) 0.0400(14) -0.0203(15) -0.0151(14) -0.072(2) 
C51 0.0265(15) 0.0354(17) 0.0328(17) -0.0150(14) -0.0071(13) -0.0065(13) 
F52 0.0318(11) 0.0534(13) 0.0528(14) -0.0243(11) 0.0019(10) -0.0146(10) 
F53 0.0390(13) 0.0314(11) 0.113(3) -0.0231(14) -0.0214(14) -0.0067(9) 
C54 0.0233(14) 0.0282(15) 0.0246(14) -0.0112(12) -0.0069(11) -0.0029(11) 
C55 0.0221(14) 0.0301(15) 0.0300(15) -0.0124(13) -0.0114(12) 0.0027(11) 
C56 0.0269(15) 0.0237(14) 0.0256(14) -0.0099(12) -0.0104(12) 0.0034(11) 
C57 0.0308(16) 0.0261(15) 0.0296(16) -0.0076(13) -0.0118(13) 0.0030(12) 
F58 0.0800(18) 0.0334(11) 0.0337(11) -0.0070(9) -0.0272(12) 0.0055(11) 
F59 0.0400(13) 0.0357(12) 0.0695(18) -0.0088(12) -0.0028(12) 0.0146(10) 
F60 0.087(2) 0.0255(10) 0.0820(19) -0.0191(11) -0.0584(17) 0.0062(11) 
C61 0.0244(14) 0.0237(14) 0.0247(14) -0.0101(11) -0.0082(11) -0.0015(11) 
C62 0.0218(13) 0.0240(14) 0.0227(13) -0.0101(11) -0.0084(11) 0.0008(11) 
C63 0.0248(14) 0.0223(13) 0.0254(14) -0.0100(11) -0.0090(11) 0.0000(11) 
B64 0.0205(15) 0.0212(15) 0.0237(15) -0.0076(12) -0.0100(12) 0.0006(11) 
C65 0.0229(14) 0.0210(13) 0.0244(14) -0.0094(11) -0.0098(11) 0.0009(10) 
C66 0.0225(14) 0.0255(14) 0.0274(15) -0.0102(12) -0.0121(12) 0.0013(11) 
C67 0.0290(15) 0.0243(14) 0.0270(15) -0.0074(12) -0.0142(12) -0.0002(12) 
C68 0.0270(15) 0.0283(15) 0.0269(15) -0.0094(13) -0.0062(12) -0.0013(12) 
C69 0.0234(15) 0.0267(15) 0.0333(17) -0.0101(13) -0.0100(13) 0.0031(12) 
C70 0.0257(15) 0.0246(14) 0.0276(15) -0.0071(12) -0.0122(12) 0.0036(11) 
C71 0.0245(14) 0.0505(17) 0.0436(17) -0.0144(14) -0.0099(12) 0.0077(13) 
C75 0.0528(17) 0.0419(16) 0.0363(15) -0.0044(13) -0.0272(14) -0.0003(14) 
C79 0.0199(13) 0.0219(13) 0.0258(14) -0.0085(11) -0.0092(11) 0.0005(10) 
C80 0.0294(15) 0.0255(15) 0.0317(16) -0.0107(13) -0.0170(13) 0.0043(12) 
C81 0.0303(16) 0.0289(16) 0.0420(19) -0.0189(14) -0.0172(14) 0.0040(12) 
C82 0.0360(17) 0.0218(14) 0.0427(19) -0.0118(14) -0.0196(15) 0.0053(12) 
C83 0.0339(17) 0.0254(15) 0.0331(17) -0.0072(13) -0.0159(14) 0.0018(12) 
C84 0.0272(15) 0.0253(14) 0.0272(15) -0.0088(12) -0.0126(12) 0.0008(11) 
C85 0.069(2) 0.0388(16) 0.0519(18) -0.0107(14) -0.0412(16) 0.0075(15) 
C89 0.0613(19) 0.0448(16) 0.075(2) -0.0414(16) -0.0440(17) 0.0183(14) 
C93 0.0209(13) 0.0215(13) 0.0282(15) -0.0096(11) -0.0123(11) 0.0030(10) 
C94 0.0231(14) 0.0230(14) 0.0278(15) -0.0104(12) -0.0093(12) -0.0001(11) 
C95 0.0293(15) 0.0274(15) 0.0273(15) -0.0113(12) -0.0122(12) 0.0032(12) 
C96 0.0320(16) 0.0292(15) 0.0367(17) -0.0180(14) -0.0181(14) 0.0045(12) 
C97 0.0239(14) 0.0239(14) 0.0392(17) -0.0140(13) -0.0157(13) 0.0023(11) 
C98 0.0232(14) 0.0236(14) 0.0270(15) -0.0086(12) -0.0105(11) 0.0008(11) 
C99 0.0304(16) 0.0294(16) 0.050(2) -0.0172(15) -0.0184(15) -0.0005(13) 
F100 0.0546(15) 0.0239(10) 0.107(2) -0.0152(12) -0.0429(16) 0.0041(10) 
F101 0.090(2) 0.0560(15) 0.077(2) -0.0165(14) -0.0494(17) -0.0299(14) 
F102 0.0493(14) 0.0501(14) 0.080(2) -0.0313(14) 0.0057(13) -0.0237(12) 
C103 0.0567(18) 0.0491(16) 0.0277(14) -0.0183(13) -0.0102(13) -0.0097(14) 
F200 0.124(5) 0.049(3) 0.034(2) -0.030(2) 0.005(3) -0.023(3) 
F201 0.043(3) 0.054(3) 0.036(3) 0.011(2) 0.001(2) 0.003(2) 
F202 0.044(3) 0.107(4) 0.033(2) -0.011(3) -0.008(2) -0.015(3) 
F203 0.063(3) 0.105(5) 0.039(3) -0.023(3) 0.005(2) 0.010(3) 
F204 0.076(4) 0.076(4) 0.027(2) -0.017(2) -0.013(2) -0.028(3) 
F205 0.116(5) 0.035(2) 0.036(2) -0.013(2) 0.008(3) -0.038(3) 
F300 0.050(3) 0.074(4) 0.062(4) 0.039(3) -0.029(3) -0.023(3) 
F301 0.083(4) 0.061(4) 0.041(3) -0.011(3) -0.024(3) 0.045(3) 
F302 0.109(5) 0.061(3) 0.043(3) -0.010(2) -0.044(3) -0.011(3) 
F303 0.100(4) 0.080(4) 0.025(2) -0.011(2) -0.019(3) 0.030(3) 
F304 0.093(4) 0.036(2) 0.072(4) 0.011(2) -0.044(3) -0.012(3) 
F305 0.044(2) 0.077(4) 0.064(3) 0.030(3) -0.040(2) -0.010(3) 
F400 0.0235(17) 0.103(3) 0.083(3) 0.047(3) -0.0049(18) 0.003(2) 
F401 0.056(2) 0.064(2) 0.081(3) -0.050(2) -0.031(2) 0.0297(18) 
F402 0.0240(16) 0.066(2) 0.056(2) -0.0265(19) -0.0169(15) 0.0027(15) 
F403 0.027(4) 0.069(5) 0.044(4) -0.016(4) 0.006(4) 0.013(4) 
F404 0.030(4) 0.048(4) 0.041(5) 0.010(4) 0.001(4) 0.019(4) 
F405 0.031(4) 0.072(5) 0.064(5) -0.030(4) -0.005(4) -0.008(4) 
F500 0.085(4) 0.054(3) 0.056(3) -0.015(2) -0.054(3) 0.014(3) 
F501 0.066(3) 0.101(5) 0.069(4) 0.013(3) -0.056(3) -0.024(3) 
F502 0.073(4) 0.029(2) 0.036(3) -0.007(2) -0.020(3) 0.012(2) 
F503 0.119(5) 0.058(3) 0.081(4) -0.031(3) -0.082(3) 0.030(3) 
F504 0.054(2) 0.059(3) 0.061(3) -0.012(2) -0.047(2) 0.005(2) 
F505 0.063(3) 0.049(3) 0.034(3) 0.008(2) -0.010(3) 0.003(3) 
F600 0.071(3) 0.061(4) 0.086(4) -0.058(3) -0.045(3) 0.033(2) 
F601 0.087(4) 0.052(3) 0.062(3) -0.036(2) -0.047(3) 0.020(3) 
F602 0.076(4) 0.046(3) 0.096(3) -0.046(3) -0.039(3) 0.001(3) 
F603 0.067(4) 0.076(5) 0.086(4) -0.060(4) -0.030(3) 0.018(3) 
F604 0.050(3) 0.053(3) 0.066(4) -0.044(3) -0.037(3) 0.015(3) 
F605 0.100(5) 0.034(3) 0.086(4) -0.040(3) -0.047(4) 0.015(3) 

_refine_ls_extinction_method 
    'None'
_oxford_refine_ls_scale 2.808(13) 
loop_
 _geom_bond_atom_site_label_1
 _geom_bond_site_symmetry_1
 _geom_bond_atom_site_label_2
 _geom_bond_site_symmetry_2
 _geom_bond_distance
 _geom_bond_publ_flag
Ir1 . C2 . 2.049(3)    yes
Ir1 . C10 . 2.064(3)    yes
Ir1 . H11 . 1.498    no
Ir1 . C26 . 2.059(3)    yes
C2 . N3 . 1.339(4)    yes
C2 . N7 . 1.357(4)    yes
N3 . C4 . 1.481(4)    yes
N3 . C17 . 1.438(4)    yes
C4 . C5 . 1.499(5)    yes
C4 . H41 . 0.974    no
C4 . H42 . 0.961    no
C5 . C6 . 1.509(5)    yes
C5 . H51 . 0.961    no
C5 . H52 . 0.976    no
C6 . N7 . 1.474(4)    yes
C6 . H61 . 0.978    no
C6 . H62 . 0.971    no
N7 . C8 . 1.435(4)    yes
C8 . C9 . 1.411(4)    yes
C8 . C15 . 1.394(5)    yes
C9 . C10 . 1.485(5)    yes
C9 . C11 . 1.415(5)    yes
C10 . H101 . 0.972    no
C10 . H102 . 0.976    no
C11 . C12 . 1.376(5)    yes
C11 . H111 . 0.946    no
C12 . C13 . 1.509(5)    yes
C12 . C14 . 1.399(5)    yes
C13 . H131 . 0.969    no
C13 . H132 . 0.966    no
C13 . H133 . 0.969    no
C14 . C15 . 1.389(5)    yes
C14 . H141 . 0.929    no
C15 . C16 . 1.509(5)    yes
C16 . H161 . 0.964    no
C16 . H162 . 0.968    no
C16 . H163 . 0.969    no
C17 . C18 . 1.403(4)    yes
C17 . C22 . 1.395(5)    yes
C18 . C19 . 1.395(5)    yes
C18 . C25 . 1.499(5)    yes
C19 . C20 . 1.383(5)    yes
C19 . H191 . 0.933    no
C20 . C21 . 1.390(5)    yes
C20 . C24 . 1.506(5)    yes
C21 . C22 . 1.397(4)    yes
C21 . H211 . 0.930    no
C22 . C23 . 1.506(4)    yes
C23 . H231 . 0.962    no
C23 . H232 . 0.956    no
C23 . H233 . 0.955    no
C24 . H241 . 0.955    no
C24 . H242 . 0.960    no
C24 . H243 . 0.951    no
C25 . H251 . 0.964    no
C25 . H252 . 0.971    no
C25 . H253 . 0.966    no
C26 . N27 . 1.340(4)    yes
C26 . N31 . 1.333(4)    yes
N27 . C28 . 1.483(4)    yes
N27 . C41 . 1.441(4)    yes
C28 . C29 . 1.458(6)    yes
C28 . H281 . 0.963    no
C28 . H282 . 0.986    no
C29 . C30 . 1.487(6)    yes
C29 . H291 . 1.018    no
C29 . H292 . 1.001    no
C30 . N31 . 1.470(4)    yes
C30 . H301 . 0.970    no
C30 . H302 . 0.966    no
N31 . C32 . 1.444(4)    yes
C32 . C33 . 1.413(5)    yes
C32 . C39 . 1.410(5)    yes
C33 . C34 . 1.503(5)    yes
C33 . C35 . 1.410(5)    yes
C34 . H341 . 0.961    no
C34 . H342 . 0.961    no
C34 . H343 . 0.955    no
C35 . C36 . 1.370(6)    yes
C35 . H351 . 0.939    no
C36 . C37 . 1.515(5)    yes
C36 . C38 . 1.399(6)    yes
C37 . H371 . 0.961    no
C37 . H372 . 0.952    no
C37 . H373 . 0.957    no
C38 . C39 . 1.388(5)    yes
C38 . H381 . 0.929    no
C39 . C40 . 1.508(5)    yes
C40 . H401 . 0.955    no
C40 . H402 . 0.958    no
C40 . H403 . 0.960    no
C41 . C42 . 1.397(5)    yes
C41 . C46 . 1.393(5)    yes
C42 . C43 . 1.387(5)    yes
C42 . C49 . 1.500(5)    yes
C43 . C44 . 1.394(6)    yes
C43 . H431 . 0.934    no
C44 . C45 . 1.381(6)    yes
C44 . C48 . 1.507(5)    yes
C45 . C46 . 1.399(6)    yes
C45 . H451 . 0.931    no
C46 . C47 . 1.502(6)    yes
C47 . H471 . 0.961    no
C47 . H472 . 0.957    no
C47 . H473 . 0.960    no
C48 . H481 . 0.952    no
C48 . H482 . 0.958    no
C48 . H483 . 0.960    no
C49 . H491 . 0.961    no
C49 . H492 . 0.960    no
C49 . H493 . 0.959    no
F50 . C51 . 1.331(4)    yes
C51 . F52 . 1.328(4)    yes
C51 . F53 . 1.330(4)    yes
C51 . C54 . 1.502(4)    yes
C54 . C55 . 1.385(4)    yes
C54 . C63 . 1.396(4)    yes
C55 . C56 . 1.383(5)    yes
C55 . H551 . 0.932    no
C56 . C57 . 1.496(4)    yes
C56 . C61 . 1.391(4)    yes
C57 . F58 . 1.331(4)    yes
C57 . F59 . 1.331(4)    yes
C57 . F60 . 1.336(4)    yes
C61 . C62 . 1.404(4)    yes
C61 . H611 . 0.932    no
C62 . C63 . 1.399(4)    yes
C62 . B64 . 1.641(4)    yes
C63 . H631 . 0.930    no
B64 . C65 . 1.648(4)    yes
B64 . C79 . 1.645(4)    yes
B64 . C93 . 1.636(4)    yes
C65 . C66 . 1.398(4)    yes
C65 . C70 . 1.404(4)    yes
C66 . C67 . 1.394(4)    yes
C66 . H661 . 0.933    no
C67 . C68 . 1.385(4)    yes
C67 . C75 . 1.496(3)    yes
C68 . C69 . 1.383(5)    yes
C68 . H681 . 0.930    no
C69 . C70 . 1.383(5)    yes
C69 . C71 . 1.497(3)    yes
C70 . H701 . 0.939    no
C71 . F400 . 1.326(4)    yes
C71 . F401 . 1.316(4)    yes
C71 . F402 . 1.338(4)    yes
C71 . F403 . 1.323(6)    yes
C71 . F404 . 1.317(6)    yes
C71 . F405 . 1.303(6)    yes
C75 . F300 . 1.301(5)    yes
C75 . F301 . 1.303(5)    yes
C75 . F302 . 1.324(5)    yes
C75 . F303 . 1.303(5)    yes
C75 . F304 . 1.321(5)    yes
C75 . F305 . 1.296(4)    yes
C79 . C80 . 1.405(4)    yes
C79 . C84 . 1.401(4)    yes
C80 . C81 . 1.390(4)    yes
C80 . H801 . 0.942    no
C81 . C82 . 1.386(5)    yes
C81 . C89 . 1.493(4)    yes
C82 . C83 . 1.378(5)    yes
C82 . H821 . 0.931    no
C83 . C84 . 1.396(4)    yes
C83 . C85 . 1.486(4)    yes
C84 . H841 . 0.936    no
C85 . F500 . 1.368(5)    yes
C85 . F501 . 1.309(5)    yes
C85 . F502 . 1.338(5)    yes
C85 . F503 . 1.327(5)    yes
C85 . F504 . 1.369(5)    yes
C85 . F505 . 1.317(5)    yes
C89 . F600 . 1.336(5)    yes
C89 . F601 . 1.335(5)    yes
C89 . F602 . 1.353(5)    yes
C89 . F603 . 1.342(5)    yes
C89 . F604 . 1.340(5)    yes
C89 . F605 . 1.325(5)    yes
C93 . C94 . 1.403(4)    yes
C93 . C98 . 1.403(4)    yes
C94 . C95 . 1.390(4)    yes
C94 . H941 . 0.914    no
C95 . C96 . 1.388(5)    yes
C95 . C103 . 1.489(4)    yes
C96 . C97 . 1.379(5)    yes
C96 . H961 . 0.940    no
C97 . C98 . 1.397(4)    yes
C97 . C99 . 1.501(4)    yes
C98 . H981 . 0.930    no
C99 . F100 . 1.324(4)    yes
C99 . F101 . 1.334(5)    yes
C99 . F102 . 1.324(5)    yes
C103 . F200 . 1.309(5)    yes
C103 . F201 . 1.329(5)    yes
C103 . F202 . 1.341(5)    yes
C103 . F203 . 1.325(5)    yes
C103 . F204 . 1.344(5)    yes
C103 . F205 . 1.273(4)    yes
loop_
 _geom_angle_atom_site_label_1
 _geom_angle_site_symmetry_1
 _geom_angle_atom_site_label_2
 _geom_angle_site_symmetry_2
 _geom_angle_atom_site_label_3
 _geom_angle_site_symmetry_3
 _geom_angle
 _geom_angle_publ_flag
C2 . Ir1 . C10 . 79.95(12)    yes
C2 . Ir1 . H11 . 93.0    no
C10 . Ir1 . H11 . 107.1    no
C2 . Ir1 . C26 . 174.75(12)    yes
C10 . Ir1 . C26 . 101.80(12)    yes
H11 . Ir1 . C26 . 81.7    no
Ir1 . C2 . N3 . 129.0(2)    yes
Ir1 . C2 . N7 . 113.2(2)    yes
N3 . C2 . N7 . 116.8(3)    yes
C2 . N3 . C4 . 123.9(3)    yes
C2 . N3 . C17 . 121.7(2)    yes
C4 . N3 . C17 . 114.4(2)    yes
N3 . C4 . C5 . 110.5(3)    yes
N3 . C4 . H41 . 108.5    no
C5 . C4 . H41 . 108.9    no
N3 . C4 . H42 . 110.7    no
C5 . C4 . H42 . 109.1    no
H41 . C4 . H42 . 109.1    no
C4 . C5 . C6 . 108.6(3)    yes
C4 . C5 . H51 . 108.6    no
C6 . C5 . H51 . 110.3    no
C4 . C5 . H52 . 110.1    no
C6 . C5 . H52 . 109.7    no
H51 . C5 . H52 . 109.5    no
C5 . C6 . N7 . 109.3(3)    yes
C5 . C6 . H61 . 109.9    no
N7 . C6 . H61 . 110.5    no
C5 . C6 . H62 . 109.6    no
N7 . C6 . H62 . 107.7    no
H61 . C6 . H62 . 109.7    no
C6 . N7 . C2 . 124.6(3)    yes
C6 . N7 . C8 . 118.7(3)    yes
C2 . N7 . C8 . 115.2(2)    yes
N7 . C8 . C9 . 117.8(3)    yes
N7 . C8 . C15 . 120.3(3)    yes
C9 . C8 . C15 . 122.0(3)    yes
C8 . C9 . C10 . 119.7(3)    yes
C8 . C9 . C11 . 117.4(3)    yes
C10 . C9 . C11 . 122.7(3)    yes
C9 . C10 . Ir1 . 87.9(2)    yes
C9 . C10 . H101 . 114.6    no
Ir1 . C10 . H101 . 114.7    no
C9 . C10 . H102 . 114.7    no
Ir1 . C10 . H102 . 113.9    no
H101 . C10 . H102 . 109.8    no
C9 . C11 . C12 . 121.7(3)    yes
C9 . C11 . H111 . 118.3    no
C12 . C11 . H111 . 120.0    no
C11 . C12 . C13 . 122.1(3)    yes
C11 . C12 . C14 . 118.7(3)    yes
C13 . C12 . C14 . 119.2(3)    yes
C12 . C13 . H131 . 109.3    no
C12 . C13 . H132 . 110.0    no
H131 . C13 . H132 . 108.6    no
C12 . C13 . H133 . 110.4    no
H131 . C13 . H133 . 108.7    no
H132 . C13 . H133 . 109.8    no
C12 . C14 . C15 . 122.3(3)    yes
C12 . C14 . H141 . 119.0    no
C15 . C14 . H141 . 118.6    no
C8 . C15 . C14 . 117.8(3)    yes
C8 . C15 . C16 . 122.2(3)    yes
C14 . C15 . C16 . 119.9(3)    yes
C15 . C16 . H161 . 110.1    no
C15 . C16 . H162 . 110.0    no
H161 . C16 . H162 . 108.6    no
C15 . C16 . H163 . 111.1    no
H161 . C16 . H163 . 108.9    no
H162 . C16 . H163 . 108.0    no
N3 . C17 . C18 . 119.8(3)    yes
N3 . C17 . C22 . 118.2(3)    yes
C18 . C17 . C22 . 121.8(3)    yes
C17 . C18 . C19 . 117.4(3)    yes
C17 . C18 . C25 . 121.9(3)    yes
C19 . C18 . C25 . 120.6(3)    yes
C18 . C19 . C20 . 122.4(3)    yes
C18 . C19 . H191 . 119.3    no
C20 . C19 . H191 . 118.3    no
C19 . C20 . C21 . 118.5(3)    yes
C19 . C20 . C24 . 120.9(3)    yes
C21 . C20 . C24 . 120.5(3)    yes
C20 . C21 . C22 . 121.6(3)    yes
C20 . C21 . H211 . 119.3    no
C22 . C21 . H211 . 119.1    no
C21 . C22 . C17 . 118.1(3)    yes
C21 . C22 . C23 . 120.3(3)    yes
C17 . C22 . C23 . 121.6(3)    yes
C22 . C23 . H231 . 110.5    no
C22 . C23 . H232 . 111.0    no
H231 . C23 . H232 . 108.8    no
C22 . C23 . H233 . 109.8    no
H231 . C23 . H233 . 108.6    no
H232 . C23 . H233 . 108.2    no
C20 . C24 . H241 . 109.0    no
C20 . C24 . H242 . 110.5    no
H241 . C24 . H242 . 108.1    no
C20 . C24 . H243 . 111.2    no
H241 . C24 . H243 . 109.4    no
H242 . C24 . H243 . 108.5    no
C18 . C25 . H251 . 110.8    no
C18 . C25 . H252 . 110.0    no
H251 . C25 . H252 . 109.2    no
C18 . C25 . H253 . 109.6    no
H251 . C25 . H253 . 109.8    no
H252 . C25 . H253 . 107.3    no
Ir1 . C26 . N27 . 134.8(2)    yes
Ir1 . C26 . N31 . 106.6(2)    yes
N27 . C26 . N31 . 118.1(3)    yes
C26 . N27 . C28 . 121.9(3)    yes
C26 . N27 . C41 . 121.6(3)    yes
C28 . N27 . C41 . 116.3(3)    yes
N27 . C28 . C29 . 112.8(3)    yes
N27 . C28 . H281 . 109.6    no
C29 . C28 . H281 . 111.9    no
N27 . C28 . H282 . 107.5    no
C29 . C28 . H282 . 104.9    no
H281 . C28 . H282 . 109.9    no
C28 . C29 . C30 . 114.1(4)    yes
C28 . C29 . H291 . 107.3    no
C30 . C29 . H291 . 107.5    no
C28 . C29 . H292 . 108.8    no
C30 . C29 . H292 . 107.7    no
H291 . C29 . H292 . 111.4    no
C29 . C30 . N31 . 107.6(3)    yes
C29 . C30 . H301 . 109.1    no
N31 . C30 . H301 . 108.6    no
C29 . C30 . H302 . 110.3    no
N31 . C30 . H302 . 110.7    no
H301 . C30 . H302 . 110.3    no
C30 . N31 . C26 . 126.8(3)    yes
C30 . N31 . C32 . 121.1(3)    yes
C26 . N31 . C32 . 110.8(2)    yes
N31 . C32 . C33 . 118.6(3)    yes
N31 . C32 . C39 . 119.3(3)    yes
C33 . C32 . C39 . 121.9(3)    yes
C32 . C33 . C34 . 123.1(3)    yes
C32 . C33 . C35 . 116.9(3)    yes
C34 . C33 . C35 . 119.1(3)    yes
C33 . C34 . H341 . 109.9    no
C33 . C34 . H342 . 110.1    no
H341 . C34 . H342 . 109.0    no
C33 . C34 . H343 . 109.4    no
H341 . C34 . H343 . 108.8    no
H342 . C34 . H343 . 109.7    no
C33 . C35 . C36 . 122.5(3)    yes
C33 . C35 . H351 . 118.2    no
C36 . C35 . H351 . 119.3    no
C35 . C36 . C37 . 120.7(4)    yes
C35 . C36 . C38 . 118.9(3)    yes
C37 . C36 . C38 . 120.5(4)    yes
C36 . C37 . H371 . 108.9    no
C36 . C37 . H372 . 110.2    no
H371 . C37 . H372 . 109.7    no
C36 . C37 . H373 . 108.8    no
H371 . C37 . H373 . 109.3    no
H372 . C37 . H373 . 109.9    no
C36 . C38 . C39 . 122.0(3)    yes
C36 . C38 . H381 . 119.0    no
C39 . C38 . H381 . 119.0    no
C32 . C39 . C38 . 117.7(3)    yes
C32 . C39 . C40 . 120.9(3)    yes
C38 . C39 . C40 . 121.4(3)    yes
C39 . C40 . H401 . 111.0    no
C39 . C40 . H402 . 110.6    no
H401 . C40 . H402 . 109.6    no
C39 . C40 . H403 . 108.4    no
H401 . C40 . H403 . 108.8    no
H402 . C40 . H403 . 108.4    no
N27 . C41 . C42 . 119.7(3)    yes
N27 . C41 . C46 . 118.7(3)    yes
C42 . C41 . C46 . 121.6(3)    yes
C41 . C42 . C43 . 117.9(3)    yes
C41 . C42 . C49 . 121.8(3)    yes
C43 . C42 . C49 . 120.3(3)    yes
C42 . C43 . C44 . 122.3(4)    yes
C42 . C43 . H431 . 118.5    no
C44 . C43 . H431 . 119.2    no
C43 . C44 . C45 . 118.1(3)    yes
C43 . C44 . C48 . 120.5(4)    yes
C45 . C44 . C48 . 121.4(4)    yes
C44 . C45 . C46 . 121.9(4)    yes
C44 . C45 . H451 . 119.9    no
C46 . C45 . H451 . 118.3    no
C45 . C46 . C41 . 118.2(3)    yes
C45 . C46 . C47 . 119.9(4)    yes
C41 . C46 . C47 . 122.0(4)    yes
C46 . C47 . H471 . 109.6    no
C46 . C47 . H472 . 109.9    no
H471 . C47 . H472 . 109.3    no
C46 . C47 . H473 . 110.2    no
H471 . C47 . H473 . 108.4    no
H472 . C47 . H473 . 109.5    no
C44 . C48 . H481 . 109.6    no
C44 . C48 . H482 . 110.1    no
H481 . C48 . H482 . 108.9    no
C44 . C48 . H483 . 110.9    no
H481 . C48 . H483 . 109.0    no
H482 . C48 . H483 . 108.4    no
C42 . C49 . H491 . 110.5    no
C42 . C49 . H492 . 109.7    no
H491 . C49 . H492 . 107.4    no
C42 . C49 . H493 . 111.0    no
H491 . C49 . H493 . 109.0    no
H492 . C49 . H493 . 109.1    no
F50 . C51 . F52 . 104.3(3)    yes
F50 . C51 . F53 . 107.2(3)    yes
F52 . C51 . F53 . 106.1(3)    yes
F50 . C51 . C54 . 112.1(3)    yes
F52 . C51 . C54 . 113.3(3)    yes
F53 . C51 . C54 . 113.3(3)    yes
C51 . C54 . C55 . 118.1(3)    yes
C51 . C54 . C63 . 120.7(3)    yes
C55 . C54 . C63 . 121.2(3)    yes
C54 . C55 . C56 . 118.1(3)    yes
C54 . C55 . H551 . 121.0    no
C56 . C55 . H551 . 120.9    no
C55 . C56 . C57 . 119.2(3)    yes
C55 . C56 . C61 . 120.8(3)    yes
C57 . C56 . C61 . 119.9(3)    yes
C56 . C57 . F58 . 112.2(3)    yes
C56 . C57 . F59 . 113.3(3)    yes
F58 . C57 . F59 . 107.3(3)    yes
C56 . C57 . F60 . 113.5(3)    yes
F58 . C57 . F60 . 104.7(3)    yes
F59 . C57 . F60 . 105.2(3)    yes
C56 . C61 . C62 . 122.3(3)    yes
C56 . C61 . H611 . 118.4    no
C62 . C61 . H611 . 119.3    no
C61 . C62 . C63 . 115.9(3)    yes
C61 . C62 . B64 . 119.4(3)    yes
C63 . C62 . B64 . 124.8(3)    yes
C62 . C63 . C54 . 121.7(3)    yes
C62 . C63 . H631 . 118.8    no
C54 . C63 . H631 . 119.5    no
C62 . B64 . C65 . 111.7(2)    yes
C62 . B64 . C79 . 111.9(2)    yes
C65 . B64 . C79 . 104.8(2)    yes
C62 . B64 . C93 . 106.4(2)    yes
C65 . B64 . C93 . 109.2(2)    yes
C79 . B64 . C93 . 112.9(2)    yes
B64 . C65 . C66 . 126.8(3)    yes
B64 . C65 . C70 . 117.8(3)    yes
C66 . C65 . C70 . 115.4(3)    yes
C65 . C66 . C67 . 122.3(3)    yes
C65 . C66 . H661 . 119.3    no
C67 . C66 . H661 . 118.4    no
C66 . C67 . C68 . 120.8(3)    yes
C66 . C67 . C75 . 120.4(3)    yes
C68 . C67 . C75 . 118.7(3)    yes
C67 . C68 . C69 . 117.8(3)    yes
C67 . C68 . H681 . 120.6    no
C69 . C68 . H681 . 121.6    no
C68 . C69 . C70 . 121.3(3)    yes
C68 . C69 . C71 . 120.8(3)    yes
C70 . C69 . C71 . 117.9(3)    yes
C65 . C70 . C69 . 122.3(3)    yes
C65 . C70 . H701 . 119.3    no
C69 . C70 . H701 . 118.4    no
C69 . C71 . F400 . 113.0(3)    yes
C69 . C71 . F401 . 113.1(3)    yes
F400 . C71 . F401 . 105.95(6)    yes
C69 . C71 . F402 . 112.5(3)    yes
F400 . C71 . F402 . 105.89(6)    yes
F401 . C71 . F402 . 105.79(6)    yes
C69 . C71 . F403 . 110.1(5)    yes
C69 . C71 . F404 . 112.1(5)    yes
F403 . C71 . F404 . 105.86(6)    yes
C69 . C71 . F405 . 116.3(6)    yes
F403 . C71 . F405 . 105.89(6)    yes
F404 . C71 . F405 . 105.89(6)    yes
C67 . C75 . F300 . 114.6(3)    yes
C67 . C75 . F301 . 114.6(3)    yes
F300 . C75 . F301 . 105.42(6)    yes
C67 . C75 . F302 . 110.7(3)    yes
F300 . C75 . F302 . 105.38(6)    yes
F301 . C75 . F302 . 105.35(6)    yes
C67 . C75 . F303 . 114.7(3)    yes
C67 . C75 . F304 . 110.8(3)    yes
F303 . C75 . F304 . 105.40(6)    yes
C67 . C75 . F305 . 114.3(3)    yes
F303 . C75 . F305 . 105.47(6)    yes
F304 . C75 . F305 . 105.38(6)    yes
B64 . C79 . C80 . 118.2(3)    yes
B64 . C79 . C84 . 125.8(3)    yes
C80 . C79 . C84 . 115.7(3)    yes
C79 . C80 . C81 . 122.4(3)    yes
C79 . C80 . H801 . 118.5    no
C81 . C80 . H801 . 119.0    no
C80 . C81 . C82 . 120.7(3)    yes
C80 . C81 . C89 . 121.0(3)    yes
C82 . C81 . C89 . 118.3(3)    yes
C81 . C82 . C83 . 118.0(3)    yes
C81 . C82 . H821 . 121.2    no
C83 . C82 . H821 . 120.8    no
C82 . C83 . C84 . 121.6(3)    yes
C82 . C83 . C85 . 117.9(3)    yes
C84 . C83 . C85 . 120.5(3)    yes
C79 . C84 . C83 . 121.5(3)    yes
C79 . C84 . H841 . 119.8    no
C83 . C84 . H841 . 118.6    no
C83 . C85 . F500 . 108.5(3)    yes
C83 . C85 . F501 . 119.0(4)    yes
F500 . C85 . F501 . 105.25(6)    yes
C83 . C85 . F502 . 112.6(4)    yes
F500 . C85 . F502 . 105.12(6)    yes
F501 . C85 . F502 . 105.24(6)    yes
C83 . C85 . F503 . 116.9(3)    yes
C83 . C85 . F504 . 108.4(3)    yes
F503 . C85 . F504 . 105.14(6)    yes
C83 . C85 . F505 . 115.0(4)    yes
F503 . C85 . F505 . 105.27(6)    yes
F504 . C85 . F505 . 105.15(6)    yes
C81 . C89 . F600 . 113.8(3)    yes
C81 . C89 . F601 . 115.2(4)    yes
F600 . C89 . F601 . 106.05(6)    yes
C81 . C89 . F602 . 109.2(4)    yes
F600 . C89 . F602 . 105.97(6)    yes
F601 . C89 . F602 . 106.02(6)    yes
C81 . C89 . F603 . 109.5(4)    yes
C81 . C89 . F604 . 110.6(5)    yes
F603 . C89 . F604 . 106.00(6)    yes
C81 . C89 . F605 . 118.0(5)    yes
F603 . C89 . F605 . 106.02(6)    yes
F604 . C89 . F605 . 106.03(6)    yes
B64 . C93 . C94 . 121.2(3)    yes
B64 . C93 . C98 . 123.0(3)    yes
C94 . C93 . C98 . 115.7(3)    yes
C93 . C94 . C95 . 122.1(3)    yes
C93 . C94 . H941 . 119.5    no
C95 . C94 . H941 . 118.5    no
C94 . C95 . C96 . 121.2(3)    yes
C94 . C95 . C103 . 119.0(3)    yes
C96 . C95 . C103 . 119.8(3)    yes
C95 . C96 . C97 . 117.9(3)    yes
C95 . C96 . H961 . 121.0    no
C97 . C96 . H961 . 121.1    no
C96 . C97 . C98 . 121.2(3)    yes
C96 . C97 . C99 . 120.0(3)    yes
C98 . C97 . C99 . 118.9(3)    yes
C93 . C98 . C97 . 122.0(3)    yes
C93 . C98 . H981 . 118.8    no
C97 . C98 . H981 . 119.2    no
C97 . C99 . F100 . 112.1(3)    yes
C97 . C99 . F101 . 112.5(3)    yes
F100 . C99 . F101 . 105.9(3)    yes
C97 . C99 . F102 . 113.2(3)    yes
F100 . C99 . F102 . 106.8(3)    yes
F101 . C99 . F102 . 105.7(3)    yes
C95 . C103 . F200 . 117.6(3)    yes
C95 . C103 . F201 . 111.2(3)    yes
F200 . C103 . F201 . 104.90(6)    yes
C95 . C103 . F202 . 112.6(3)    yes
F200 . C103 . F202 . 104.88(6)    yes
F201 . C103 . F202 . 104.70(6)    yes
C95 . C103 . F203 . 113.4(3)    yes
C95 . C103 . F204 . 109.6(3)    yes
F203 . C103 . F204 . 104.87(6)    yes
C95 . C103 . F205 . 118.0(3)    yes
F203 . C103 . F205 . 105.02(6)    yes
F204 . C103 . F205 . 104.90(6)    yes
loop_
 _geom_hbond_atom_site_label_D
 _geom_hbond_site_symmetry_D
 _geom_hbond_atom_site_label_H
 _geom_hbond_site_symmetry_H
 _geom_hbond_atom_site_label_A
 _geom_hbond_site_symmetry_A
 _geom_hbond_angle_DHA
 _geom_hbond_distance_DH
 _geom_hbond_distance_HA
 _geom_hbond_distance_DA
 _geom_hbond_publ_flag
C66 . H661 . C61 . 125.73(9) 0.933 2.562 3.198(6)    yes
C84 . H841 . C94 . 122.37(10) 0.936 2.593 3.194(6)    yes


_iucr_refine_instruction_details_constraints
;
#
# Punched on 06/09/12 at 17:47:56
#
#LIST     12                                                                    
BLOCK SCALE X'S, U'S 
EQUIV PART(1001,OCC) PART(1002,OCC) 
WEIGHT -1 PART(1002,OCC) 
EQUIV PART(2001,OCC) PART(2002,OCC) 
WEIGHT -1 PART(2002,OCC) 
EQUIV PART(3001,OCC) PART(3002,OCC) 
WEIGHT -1 PART(3002,OCC) 
EQUIV PART(4001,OCC) PART(4002,OCC) 
WEIGHT -1 PART(4002,OCC) 
EQUIV PART(5001,OCC) PART(5002,OCC) 
WEIGHT -1 PART(5002,OCC) 
RIDE IR  (   1,X'S) H   (  11,X'S) 
RIDE C   (   4,X'S) H   (  41,X'S) H   (  42,X'S) 
RIDE C   (   5,X'S) H   (  51,X'S) H   (  52,X'S) 
RIDE C   (   6,X'S) H   (  61,X'S) H   (  62,X'S) 
RIDE C   (  10,X'S) H   ( 101,X'S) H   ( 102,X'S) 
RIDE C   (  11,X'S) H   ( 111,X'S) 
RIDE C   (  13,X'S) H   ( 133,X'S) H   ( 131,X'S) H   ( 132,X'S) 
RIDE C   (  14,X'S) H   ( 141,X'S) 
RIDE C   (  16,X'S) H   ( 163,X'S) H   ( 161,X'S) H   ( 162,X'S) 
RIDE C   (  19,X'S) H   ( 191,X'S) 
RIDE C   (  21,X'S) H   ( 211,X'S) 
RIDE C   (  23,X'S) H   ( 232,X'S) H   ( 233,X'S) H   ( 231,X'S) 
RIDE C   (  24,X'S) H   ( 243,X'S) H   ( 241,X'S) H   ( 242,X'S) 
RIDE C   (  25,X'S) H   ( 251,X'S) H   ( 253,X'S) H   ( 252,X'S) 
RIDE C   (  28,X'S) H   ( 282,X'S) H   ( 281,X'S) 
RIDE C   (  29,X'S) H   ( 292,X'S) H   ( 291,X'S) 
RIDE C   (  30,X'S) H   ( 302,X'S) H   ( 301,X'S) 
RIDE C   (  34,X'S) H   ( 341,X'S) H   ( 343,X'S) H   ( 342,X'S) 
RIDE C   (  35,X'S) H   ( 351,X'S) 
RIDE C   (  37,X'S) H   ( 371,X'S) H   ( 373,X'S) H   ( 372,X'S) 
RIDE C   (  38,X'S) H   ( 381,X'S) 
RIDE C   (  40,X'S) H   ( 401,X'S) H   ( 403,X'S) H   ( 402,X'S) 
RIDE C   (  43,X'S) H   ( 431,X'S) 
RIDE C   (  45,X'S) H   ( 451,X'S) 
RIDE C   (  47,X'S) H   ( 473,X'S) H   ( 471,X'S) H   ( 472,X'S) 
RIDE C   (  48,X'S) H   ( 481,X'S) H   ( 483,X'S) H   ( 482,X'S) 
RIDE C   (  49,X'S) H   ( 492,X'S) H   ( 491,X'S) H   ( 493,X'S) 
RIDE C   (  55,X'S) H   ( 551,X'S) 
RIDE C   (  61,X'S) H   ( 611,X'S) 
RIDE C   (  63,X'S) H   ( 631,X'S) 
RIDE C   (  66,X'S) H   ( 661,X'S) 
RIDE C   (  68,X'S) H   ( 681,X'S) 
RIDE C   (  70,X'S) H   ( 701,X'S) 
RIDE C   (  80,X'S) H   ( 801,X'S) 
RIDE C   (  82,X'S) H   ( 821,X'S) 
RIDE C   (  84,X'S) H   ( 841,X'S) 
RIDE C   (  94,X'S) H   ( 941,X'S) 
RIDE C   (  96,X'S) H   ( 961,X'S) 
RIDE C   (  98,X'S) H   ( 981,X'S) 
END                                                                             
;


_iucr_refine_instruction_details_restraints
;
#
# Punched on 06/09/12 at 17:47:56
#
#LIST     16                                                                    
SAME C(103) F(200) F(201) F(202) AND 
CONT C(103) F(201) F(202) F(200) AND 
CONT C(103) F(202) F(200) F(201) AND 
CONT C(103) F(203) F(204) F(205) AND 
CONT C(103) F(204) F(205) F(203) AND 
CONT C(103) F(205) F(203) F(204) 
SIMU 0.01 C(103) F(200) F(201) F(202) AND 
CONT C(103) F(201) F(202) F(200) AND 
CONT C(103) F(202) F(200) F(201) AND 
CONT C(103) F(203) F(204) F(205) AND 
CONT C(103) F(204) F(205) F(203) AND 
CONT C(103) F(205) F(203) F(204) 
DELU 0.01 C(103) F(200) F(201) F(202) AND 
CONT C(103) F(201) F(202) F(200) AND 
CONT C(103) F(202) F(200) F(201) AND 
CONT C(103) F(203) F(204) F(205) AND 
CONT C(103) F(204) F(205) F(203) AND 
CONT C(103) F(205) F(203) F(204) 
SAME C(75) F(300) F(301) F(302) AND 
CONT C(75) F(301) F(302) F(300) AND 
CONT C(75) F(302) F(300) F(301) AND 
CONT C(75) F(303) F(304) F(305) AND 
CONT C(75) F(304) F(305) F(303) AND 
CONT C(75) F(305) F(303) F(304) 
SIMU 0.01 C(75) F(300) F(301) F(302) AND 
CONT C(75) F(301) F(302) F(300) AND 
CONT C(75) F(302) F(300) F(301) AND 
CONT C(75) F(303) F(304) F(305) AND 
CONT C(75) F(304) F(305) F(303) AND 
CONT C(75) F(305) F(303) F(304) 
DELU 0.01 C(75) F(300) F(301) F(302) AND 
CONT C(75) F(301) F(302) F(300) AND 
CONT C(75) F(302) F(300) F(301) AND 
CONT C(75) F(303) F(304) F(305) AND 
CONT C(75) F(304) F(305) F(303) AND 
CONT C(75) F(305) F(303) F(304) 
SAME C(71) F(400) F(401) F(402) AND 
CONT C(71) F(401) F(402) F(400) AND 
CONT C(71) F(402) F(400) F(401) AND 
CONT C(71) F(403) F(404) F(405) AND 
CONT C(71) F(404) F(405) F(403) AND 
CONT C(71) F(405) F(403) F(404) 
SIMU 0.01 C(71) F(400) F(401) F(402) AND 
CONT C(71) F(401) F(402) F(400) AND 
CONT C(71) F(402) F(400) F(401) AND 
CONT C(71) F(403) F(404) F(405) AND 
CONT C(71) F(404) F(405) F(403) AND 
CONT C(71) F(405) F(403) F(404) 
DELU 0.01 C(71) F(400) F(401) F(402) AND 
CONT C(71) F(401) F(402) F(400) AND 
CONT C(71) F(402) F(400) F(401) AND 
CONT C(71) F(403) F(404) F(405) AND 
CONT C(71) F(404) F(405) F(403) AND 
CONT C(71) F(405) F(403) F(404) 
SAME C(85) F(500) F(501) F(502) AND 
CONT C(85) F(501) F(502) F(500) AND 
CONT C(85) F(502) F(500) F(501) AND 
CONT C(85) F(503) F(504) F(505) AND 
CONT C(85) F(504) F(505) F(503) AND 
CONT C(85) F(505) F(503) F(504) 
SIMU 0.01 C(85) F(500) F(501) F(502) AND 
CONT C(85) F(501) F(502) F(500) AND 
CONT C(85) F(502) F(500) F(501) AND 
CONT C(85) F(503) F(504) F(505) AND 
CONT C(85) F(504) F(505) F(503) AND 
CONT C(85) F(505) F(503) F(504) 
DELU 0.01 C(85) F(500) F(501) F(502) AND 
CONT C(85) F(501) F(502) F(500) AND 
CONT C(85) F(502) F(500) F(501) AND 
CONT C(85) F(503) F(504) F(505) AND 
CONT C(85) F(504) F(505) F(503) AND 
CONT C(85) F(505) F(503) F(504) 
SAME C(89) F(600) F(601) F(602) AND 
CONT C(89) F(601) F(602) F(600) AND 
CONT C(89) F(602) F(600) F(601) AND 
CONT C(89) F(603) F(604) F(605) AND 
CONT C(89) F(604) F(605) F(603) AND 
CONT C(89) F(605) F(603) F(604) 
SIMU 0.01 C(89) F(600) F(601) F(602) AND 
CONT C(89) F(601) F(602) F(600) AND 
CONT C(89) F(602) F(600) F(601) AND 
CONT C(89) F(603) F(604) F(605) AND 
CONT C(89) F(604) F(605) F(603) AND 
CONT C(89) F(605) F(603) F(604) 
DELU 0.01 C(89) F(600) F(601) F(602) AND 
CONT C(89) F(601) F(602) F(600) AND 
CONT C(89) F(602) F(600) F(601) AND 
CONT C(89) F(603) F(604) F(605) AND 
CONT C(89) F(604) F(605) F(603) AND 
CONT C(89) F(605) F(603) F(604) 
REM   HREST   START (DO NOT REMOVE THIS LINE) 
REM   HREST   END (DO NOT REMOVE THIS LINE) 
END                                                                             
;
#==============================================================================
data_2b
#==============================================================================
_audit_creation_date        "12-09-05"
_audit_creation_method CRYSTALS_ver_14.23

_oxford_structure_analysis_title  '035jrnp11'
_chemical_name_systematic         .
_chemical_melting_point           .

_cell_length_a                    12.6230(2)
_cell_length_b                    16.3790(3)
_cell_length_c                    19.2977(3)
_cell_angle_alpha                 100.9174(8)
_cell_angle_beta                  104.0419(7)
_cell_angle_gamma                 94.8383(9)
_cell_volume                      3764.84(11)
 
_symmetry_cell_setting            'triclinic' 
_symmetry_space_group_name_H-M    'P -1 ' 
_symmetry_space_group_name_Hall   '-P 1'
loop_
 _symmetry_equiv_pos_as_xyz
 'x,y,z'
 '-x,-y,-z'

loop_
_atom_type_symbol
_atom_type_scat_dispersion_real
_atom_type_scat_dispersion_imag
_atom_type_scat_Cromer_Mann_a1
_atom_type_scat_Cromer_Mann_b1
_atom_type_scat_Cromer_Mann_a2
_atom_type_scat_Cromer_Mann_b2
_atom_type_scat_Cromer_Mann_a3
_atom_type_scat_Cromer_Mann_b3
_atom_type_scat_Cromer_Mann_a4
_atom_type_scat_Cromer_Mann_b4
_atom_type_scat_Cromer_Mann_c
_atom_type_scat_source  
 C       0.0033   0.0016   2.3100  20.8439   1.0200  10.2075   1.5886   0.5687
   0.8650  51.6512   0.2156 'International Tables Vol C 4.2.6.8 and 6.1.1.4'
 H       0.0000   0.0000   0.4930  10.5109   0.3229  26.1257   0.1402   3.1424
   0.0408  57.7998   0.0030 'International Tables Vol C 4.2.6.8 and 6.1.1.4'
 N       0.0061   0.0033  12.2126   0.0057   3.1322   9.8933   2.0125  28.9975
   1.1663   0.5826 -11.5290 'International Tables Vol C 4.2.6.8 and 6.1.1.4'
 Ir     -1.4442   7.9887  27.3049   1.5928  16.7296   8.8655  15.6115   0.4179
   5.8338  45.0011  11.4722 'International Tables Vol C 4.2.6.8 and 6.1.1.4'
 B       0.0013   0.0007   2.0545  23.2185   1.3326   1.0210   1.0979  60.3498
   0.7068   0.1403  -0.1932 'International Tables Vol C 4.2.6.8 and 6.1.1.4'
 F       0.0171   0.0103   3.5392  10.2825   2.6412   4.2944   1.5170   0.2615
   1.0243  26.1476   0.2776 'International Tables Vol C 4.2.6.8 and 6.1.1.4'
 Cl      0.1484   0.1585  11.4604   0.0104   7.1964   1.1662   6.2556  18.5194
   1.6455  47.7784  -9.5574 'International Tables Vol C 4.2.6.8 and 6.1.1.4'
 
 
_cell_formula_units_Z                    2

# Given Formula = C78.50 H73 B1 Cl1 F24 Ir1 N4 
# Dc =      1.56 Fooo =   1774.00 Mu =     19.15 M =   1766.91
# Found Formula = C78.50 H73 B1 Cl1 F24 Ir1 N4 
# Dc =      1.56 FOOO =   1774.00 Mu =     19.15 M =   1766.90

_chemical_formula_sum             'C78.50 H73 B1 Cl1 F24 Ir1 N4'
_chemical_formula_moiety          'C46 H60 Ir N4, C32 H12 B F24, 0.5(C H2 Cl2)'
_chemical_compound_source                .
_chemical_formula_weight           1766.90
 
 
_cell_measurement_reflns_used        15437
_cell_measurement_theta_min              5
_cell_measurement_theta_max             27
_cell_measurement_temperature          150
 
_exptl_crystal_description        'block' 
_exptl_crystal_colour             'yellow' 
_exptl_crystal_size_min           0.180 
_exptl_crystal_size_mid           0.240 
_exptl_crystal_size_max           0.260 
 
_exptl_crystal_density_diffrn     1.559 
_exptl_crystal_density_meas       . 
_exptl_crystal_density_method     'not measured' 
# Non-dispersive F(000): 
_exptl_crystal_F_000              1774 
_exptl_absorpt_coefficient_mu     1.915 
 
# Sheldrick geometric approximatio 0.63 0.71 
_exptl_absorpt_correction_type    multi-scan 
_exptl_absorpt_process_details    'DENZO/SCALEPACK (Otwinowski & Minor, 1997)' 
_exptl_absorpt_correction_T_min   0.64 
_exptl_absorpt_correction_T_max   0.71 
# For a Kappa CCD, set Tmin to 1.0 and 
# Tmax to the ratio of max:min frame scales in scale_all.log 
_diffrn_measurement_device_type   'Nonius KappaCCD' 
_diffrn_measurement_device        'Area' 
_diffrn_radiation_monochromator   'graphite' 
_diffrn_radiation_type            'Mo K\a'
_diffrn_radiation_wavelength           0.71073
_diffrn_measurement_method        \w 
 
# If a reference occurs more than once, delete the author 
# and date from subsequent references. 
_computing_data_collection        'COLLECT (Nonius, 2001).' 
_computing_cell_refinement        'DENZO/SCALEPACK (Otwinowski & Minor, 1997)' 
_computing_data_reduction         'DENZO/SCALEPACK (Otwinowski & Minor, 1997)' 
_computing_structure_solution     'Superflip (Palatinus & Chapuis, 2007)' 
_computing_structure_refinement   'CRYSTALS (Betteridge et al., 2003)' 
_computing_publication_material   'CRYSTALS (Betteridge et al., 2003)' 
_computing_molecular_graphics     'CAMERON (Watkin et al., 1996)' 
 
_diffrn_standards_interval_time   . 
_diffrn_standards_interval_count  . 
_diffrn_standards_number          0 
_diffrn_standards_decay_%         . 
 
_diffrn_ambient_temperature        150
_diffrn_reflns_number             57468 
_reflns_number_total              17157 
_diffrn_reflns_av_R_equivalents   0.066 
# Number of reflections without Friedels Law is 30284 
# Number of reflections with Friedels Law is 17157 
# Theoretical number of reflections is about 17325 
 
 
_diffrn_reflns_theta_min          5.119 
_diffrn_reflns_theta_max          27.516 
_diffrn_measured_fraction_theta_max 0.990 
 
_diffrn_reflns_theta_full         26.965 
_diffrn_measured_fraction_theta_full 0.993 
 
 
_diffrn_reflns_limit_h_min        -14 
_diffrn_reflns_limit_h_max        16 
_diffrn_reflns_limit_k_min        -21 
_diffrn_reflns_limit_k_max        21 
_diffrn_reflns_limit_l_min        -25 
_diffrn_reflns_limit_l_max        25 
_reflns_limit_h_min               -16 
_reflns_limit_h_max               15 
_reflns_limit_k_min               -21 
_reflns_limit_k_max               20 
_reflns_limit_l_min               0 
_reflns_limit_l_max               25 
 
_oxford_diffrn_Wilson_B_factor    1.73 
_oxford_diffrn_Wilson_scale       163.16 
 
_atom_sites_solution_primary      Other  #heavy,direct,difmap,geom
# _atom_sites_solution_secondary  difmap
_atom_sites_solution_hydrogens    difmap
 
_refine_diff_density_min          -3.41 
_refine_diff_density_max          4.19 
 
 
# The current dictionary definitions do not cover the 
# situation where the reflections used for refinement were 
# selected by a user-defined sigma threshold 
 
 
# The values actually used during refinement 
_oxford_reflns_threshold_expression_ref     I>-3.0\s(I)
_refine_ls_number_reflns          17157 
_refine_ls_number_restraints      2748 
_refine_ls_number_parameters      1196 
_oxford_refine_ls_R_factor_ref    0.0988 
_refine_ls_wR_factor_ref          0.1289 
_refine_ls_goodness_of_fit_ref    0.9607 
_refine_ls_shift/su_max           0.0219735 
_refine_ls_shift/su_mean          0.0002919 
 
 
# The values computed from all data 
_oxford_reflns_number_all         17157 
_refine_ls_R_factor_all           0.0988 
_refine_ls_wR_factor_all          0.1289 
 
# The values computed with a 2 sigma cutoff - a la SHELX 
_reflns_threshold_expression      I>2.0\s(I)
_reflns_number_gt                 12010 
_refine_ls_R_factor_gt            0.0575 
_refine_ls_wR_factor_gt           0.0958 
 
# choose from: rm (reference molecule of known chirality), 
# ad (anomolous dispersion - Flack), rmad (rm and ad), 
# syn (from synthesis), unk (unknown) or . (not applicable). 
_chemical_absolute_configuration  '.' 
 
 
_refine_ls_structure_factor_coef  Fsqd 
_refine_ls_matrix_type            full
_refine_ls_hydrogen_treatment     constr         # none, undef, noref, refall,
                                                 # refxyz, refU, constr or mixed
_refine_ls_weighting_scheme       calc 
_refine_ls_weighting_details 
;
 Method, part 1, Chebychev polynomial, (Watkin, 1994, Prince, 1982) 
 [weight] = 1.0/[A~0~*T~0~(x)+A~1~*T~1~(x) ... +A~n-1~]*T~n-1~(x)] 
 where A~i~ are the Chebychev coefficients listed below and x= Fcalc/Fmax 
 Method = Robust Weighting (Prince, 1982) 
 W = [weight] * [1-(deltaF/6*sigmaF)^2^]^2^ 
 A~i~ are: 
 2.86 2.11 0.383 
;
# Insert your own references if required - in alphabetical order 
_publ_section_references 
; 
Nonius (2001). COLLECT. Nonius BV, Delft, The Netherlands. 
 
Otwinowski, Z. & Minor, W. (1997). Methods in Enzymology, Vol. 276, 
edited by C. W. Carter Jr & R. M. Sweet, pp. 307--326. 
New York: Academic Press. 
 
Betteridge, P.W., Carruthers, J.R., Cooper, R.I., 
Prout, K. & Watkin, D.J. (2003). J. Appl. Cryst. 36, 1487. 
 
Watkin, D.J., Prout, C.K. & Pearce, L.J. (1996). CAMERON, Chemical 
Crystallography Laboratory, Oxford, UK. 
 
Palatinus, L. & Chapuis, G. (2007). J. Appl. Cryst. 40, 786-790. 
 
Watkin D.J. (1994). 
Acta Cryst, A50, 411-437. 
 
Prince, E. 
Mathematical Techniques in Crystallography 
and Materials Science 
Springer-Verlag, New York, 1982. 
; 

# Uequiv = arithmetic mean of Ui i.e. Ueqiv = (U1+U2+U3)/3

# Replace last . with number of unfound hydrogen atoms attached to an atom.

# ..._refinement_flags_... 
# . no refinement constraints           S special position constraint on site
# G rigid group refinement of site      R riding atom
# D distance or angle restraint on site T thermal displacement constraints
# U Uiso or Uij restraint (rigid bond)  P partial occupancy constraint


loop_
_atom_site_label
_atom_site_type_symbol
_atom_site_fract_x
_atom_site_fract_y
_atom_site_fract_z
_atom_site_U_iso_or_equiv
_atom_site_occupancy
_atom_site_adp_type
_atom_site_refinement_flags_posn
_atom_site_refinement_flags_adp
_atom_site_refinement_flags_occupancy
_atom_site_disorder_assembly
_atom_site_disorder_group
_atom_site_attached_hydrogens
Ir1 Ir 0.97444(2) 0.778135(19) 0.206076(16) 0.0219 1.0000 Uani . . . . . . 
C2 C 1.0101(6) 0.7958(4) 0.1107(4) 0.0295 1.0000 Uani . . . . . . 
C3 C 0.9783(6) 0.8800(4) 0.1042(4) 0.0260 1.0000 Uani . . . . . . 
C4 C 0.8715(5) 0.8948(4) 0.1018(3) 0.0239 1.0000 Uani . . . . . . 
N5 N 0.7892(4) 0.8253(4) 0.0972(3) 0.0258 1.0000 Uani . . . . . . 
C6 C 0.8136(5) 0.7743(4) 0.1454(4) 0.0231 1.0000 Uani . . . . . . 
N7 N 0.7289(4) 0.7193(4) 0.1469(3) 0.0269 1.0000 Uani . . . . . . 
C8 C 0.7493(6) 0.6594(4) 0.1943(4) 0.0273 1.0000 Uani . . . . . . 
C9 C 0.7220(6) 0.6776(5) 0.2614(4) 0.0320 1.0000 Uani . . . . . . 
C10 C 0.6721(7) 0.7553(5) 0.2853(4) 0.0435 1.0000 Uani . . . . . . 
H11 H 0.9542 0.6772 0.1653 0.0408 1.0000 Uiso R . . . . . 
C11 C 0.7429(7) 0.6203(5) 0.3070(4) 0.0395 1.0000 Uani . . . . . . 
C12 C 0.7855(7) 0.5477(5) 0.2872(4) 0.0387 1.0000 Uani . . . . . . 
C13 C 0.8055(6) 0.5305(5) 0.2191(4) 0.0357 1.0000 Uani . . . . . . 
C14 C 0.7865(6) 0.5840(4) 0.1708(4) 0.0264 1.0000 Uani . . . . . . 
C15 C 0.8035(7) 0.5588(5) 0.0960(4) 0.0365 1.0000 Uani . . . . . . 
C16 C 0.8092(9) 0.4881(6) 0.3378(5) 0.0633 1.0000 Uani . . . . . . 
C17 C 0.6118(6) 0.7229(5) 0.1132(4) 0.0387 1.0000 Uani . . . . . . 
C18 C 0.5768(7) 0.6837(6) 0.0326(5) 0.0542 1.0000 Uani . . . . . . 
C19 C 0.6610(9) 0.7159(7) -0.0056(5) 0.0682 1.0000 Uani . . . . . . 
C20 C 0.7049(8) 0.8031(6) 0.0239(5) 0.0592 1.0000 Uani . . . . . . 
C21 C 0.8397(6) 0.9745(5) 0.0997(4) 0.0341 1.0000 Uani . . . . . . 
H21 H 1.0881 0.7943 0.1144 0.0350 1.0000 Uiso R . . . . . 
C22 C 0.9185(6) 1.0385(5) 0.0977(4) 0.0323 1.0000 Uani . . . . . . 
H22 H 0.9668 0.7532 0.0684 0.0348 1.0000 Uiso R . . . . . 
C23 C 1.0258(6) 1.0266(4) 0.0982(4) 0.0298 1.0000 Uani . . . . . . 
C24 C 1.0541(6) 0.9464(5) 0.1027(4) 0.0332 1.0000 Uani . . . . . . 
C25 C 1.1092(7) 1.0942(5) 0.0933(5) 0.0476 1.0000 Uani . . . . . . 
C26 C 0.7234(6) 0.9932(5) 0.0992(5) 0.0434 1.0000 Uani . . . . . . 
C27 C 1.1355(6) 0.7809(5) 0.2622(4) 0.0271 1.0000 Uani . . . . . . 
N28 N 1.2057(5) 0.7250(4) 0.2553(3) 0.0325 1.0000 Uani . . . . . . 
C28 C 0.4336(4) -0.0247(3) 0.1299(2) 0.0558 1.0000 Uani D . . . . . 
C29 C 1.3252(6) 0.7437(6) 0.2917(5) 0.0478 1.0000 Uani . . . . . . 
C30 C 1.3536(7) 0.7415(6) 0.3724(5) 0.0544 1.0000 Uani . . . . . . 
C31 C 1.2854(8) 0.7952(6) 0.4120(5) 0.0588 1.0000 Uani . . . . . . 
C32 C 1.2594(7) 0.8732(5) 0.3828(4) 0.0468 1.0000 Uani . . . . . . 
N33 N 1.1702(5) 0.8534(4) 0.3132(3) 0.0293 1.0000 Uani . . . . . . 
C33 C 0.7121(4) 0.2871(3) 0.1141(3) 0.0566 1.0000 Uani D . . . . . 
C34 C 1.0886(6) 0.9106(4) 0.3057(4) 0.0302 1.0000 Uani . . . . . . 
C35 C 1.1164(6) 0.9898(5) 0.2918(4) 0.0305 1.0000 Uani . . . . . . 
C36 C 1.2286(6) 1.0162(5) 0.2827(5) 0.0409 1.0000 Uani . . . . . . 
C37 C 1.0366(6) 1.0427(5) 0.2861(4) 0.0360 1.0000 Uani . . . . . . 
C38 C 0.9314(6) 1.0213(4) 0.2938(4) 0.0334 1.0000 Uani . . . . . . 
C39 C 0.9066(6) 0.9424(5) 0.3070(4) 0.0325 1.0000 Uani . . . . . . 
C40 C 0.9842(6) 0.8860(4) 0.3147(4) 0.0295 1.0000 Uani . . . . . . 
C41 C 0.9587(6) 0.8057(5) 0.3373(4) 0.0356 1.0000 Uani . . . . . . 
C42 C 0.8476(7) 1.0817(5) 0.2882(5) 0.0516 1.0000 Uani . . . . . . 
C43 C 1.1675(6) 0.6441(5) 0.2058(4) 0.0303 1.0000 Uani . . . . . . 
C44 C 1.1109(6) 0.5805(4) 0.2260(4) 0.0293 1.0000 Uani . . . . . . 
C45 C 1.0864(7) 0.5937(5) 0.3004(4) 0.0387 1.0000 Uani . . . . . . 
C46 C 1.0749(6) 0.5048(5) 0.1771(4) 0.0315 1.0000 Uani . . . . . . 
C47 C 1.0960(7) 0.4879(5) 0.1089(4) 0.0349 1.0000 Uani . . . . . . 
C48 C 1.0574(8) 0.4039(5) 0.0568(4) 0.0500 1.0000 Uani . . . . . . 
C49 C 1.1550(7) 0.5524(5) 0.0904(4) 0.0425 1.0000 Uani . . . . . . 
C50 C 1.1931(6) 0.6304(5) 0.1385(4) 0.0361 1.0000 Uani . . . . . . 
C51 C 1.2615(7) 0.6970(6) 0.1150(5) 0.0519 1.0000 Uani . . . . . . 
F52 F 0.1295(4) 0.3096(3) 0.1904(2) 0.0502 1.0000 Uani . . . . . . 
C52 C 0.9369(3) 0.3213(4) 0.4632(3) 0.0597 1.0000 Uani D . . . . . 
C53 C 0.1096(6) 0.2911(5) 0.2508(4) 0.0322 1.0000 Uani . . . . . . 
F54 F 0.0265(4) 0.2272(3) 0.2279(3) 0.0551 1.0000 Uani . . . . . . 
C55 C 0.2798(4) 0.2112(3) 0.48406(19) 0.0515 1.0000 Uani D . . . . . 
F55 F 0.0680(4) 0.3566(3) 0.2817(3) 0.0529 1.0000 Uani . . . . . . 
C56 C 0.2092(5) 0.2716(4) 0.3015(3) 0.0217 1.0000 Uani . . . . . . 
C57 C 0.1966(5) 0.2517(4) 0.3664(4) 0.0263 1.0000 Uani . . . . . . 
C58 C 0.2888(5) 0.2354(4) 0.4152(4) 0.0258 1.0000 Uani . . . . . . 
C59 C 0.3905(5) 0.2394(4) 0.3999(4) 0.0248 1.0000 Uani . . . . . . 
C60 C 0.4056(5) 0.2594(4) 0.3345(3) 0.0206 1.0000 Uani . . . . . . 
C61 C 0.3100(5) 0.2728(4) 0.2859(4) 0.0235 1.0000 Uani . . . . . . 
B62 B 0.5272(6) 0.2552(5) 0.3182(4) 0.0237 1.0000 Uani . . . . . . 
C63 C 0.5333(5) 0.1557(4) 0.2967(4) 0.0226 1.0000 Uani . . . . . . 
C64 C 0.5694(5) 0.1083(4) 0.3496(4) 0.0250 1.0000 Uani . . . . . . 
C65 C 0.5610(5) 0.0211(4) 0.3328(4) 0.0255 1.0000 Uani . . . . . . 
C66 C 0.5174(6) -0.0240(4) 0.2611(4) 0.0314 1.0000 Uani . . . . . . 
C67 C 0.4815(6) 0.0205(5) 0.2074(4) 0.0307 1.0000 Uani . . . . . . 
C68 C 0.4867(6) 0.1079(4) 0.2252(4) 0.0282 1.0000 Uani . . . . . . 
C69 C 0.5998(4) -0.0257(3) 0.3908(2) 0.0431 1.0000 Uani D . . . . . 
C72 C 0.6746(4) 0.4969(3) 0.5456(2) 0.0622 1.0000 Uani D . . . . . 
C73 C 0.6261(5) 0.3053(4) 0.3897(3) 0.0206 1.0000 Uani . . . . . . 
C74 C 0.6111(6) 0.3742(4) 0.4398(4) 0.0308 1.0000 Uani . . . . . . 
C75 C 0.6983(6) 0.4233(5) 0.4946(4) 0.0317 1.0000 Uani . . . . . . 
C76 C 0.8039(6) 0.4054(4) 0.5026(4) 0.0295 1.0000 Uani . . . . . . 
C77 C 0.8218(5) 0.3379(4) 0.4542(4) 0.0251 1.0000 Uani . . . . . . 
C78 C 0.7350(5) 0.2890(4) 0.3997(4) 0.0233 1.0000 Uani . . . . . . 
C79 C 0.5450(5) 0.3032(4) 0.2535(4) 0.0232 1.0000 Uani . . . . . . 
C80 C 0.4985(6) 0.3762(4) 0.2425(4) 0.0300 1.0000 Uani . . . . . . 
C81 C 0.5198(6) 0.4177(5) 0.1891(4) 0.0350 1.0000 Uani . . . . . . 
C82 C 0.5891(6) 0.3898(5) 0.1469(4) 0.0345 1.0000 Uani . . . . . . 
C83 C 0.6375(6) 0.3188(5) 0.1582(4) 0.0325 1.0000 Uani . . . . . . 
C84 C 0.6145(5) 0.2765(5) 0.2101(4) 0.0290 1.0000 Uani . . . . . . 
C85 C 0.4611(4) 0.4899(3) 0.1758(3) 0.0707 1.0000 Uani D . . . . . 
H101 H 0.6983 0.7741 0.3376 0.0650 1.0000 Uiso R . . . . . 
H102 H 0.5931 0.7422 0.2715 0.0651 1.0000 Uiso R . . . . . 
H103 H 0.6935 0.7992 0.2623 0.0648 1.0000 Uiso R . . . . . 
H111 H 0.7272 0.6320 0.3525 0.0469 1.0000 Uiso R . . . . . 
Cl123 Cl 0.0412(9) -0.0764(8) 0.5111(6) 0.1384 0.5000 Uani D . . 8 -1 . 
H131 H 0.8333 0.4806 0.2049 0.0431 1.0000 Uiso R . . . . . 
H151 H 0.8430 0.6057 0.0853 0.0552 1.0000 Uiso R . . . . . 
H152 H 0.8451 0.5122 0.0943 0.0551 1.0000 Uiso R . . . . . 
H153 H 0.7334 0.5427 0.0601 0.0551 1.0000 Uiso R . . . . . 
H161 H 0.8562 0.5177 0.3843 0.0951 1.0000 Uiso R . . . . . 
H162 H 0.8455 0.4437 0.3176 0.0950 1.0000 Uiso R . . . . . 
H163 H 0.7417 0.4641 0.3450 0.0951 1.0000 Uiso R . . . . . 
H171 H 0.5994 0.7812 0.1202 0.0460 1.0000 Uiso R . . . . . 
H172 H 0.5672 0.6924 0.1373 0.0460 1.0000 Uiso R . . . . . 
H181 H 0.5044 0.6974 0.0113 0.0650 1.0000 Uiso R . . . . . 
H182 H 0.5731 0.6231 0.0264 0.0652 1.0000 Uiso R . . . . . 
H191 H 0.6239 0.7087 -0.0577 0.0811 1.0000 Uiso R . . . . . 
H192 H 0.7227 0.6825 0.0001 0.0811 1.0000 Uiso R . . . . . 
H201 H 0.6420 0.8330 0.0279 0.0712 1.0000 Uiso R . . . . . 
H202 H 0.7399 0.8225 -0.0110 0.0709 1.0000 Uiso R . . . . . 
C213 C 0.0514(10) 0.0308(9) 0.4957(13) 0.1199 0.5000 Uani D . . 8 -1 . 
H221 H 0.8978 1.0919 0.0958 0.0392 1.0000 Uiso R . . . . . 
Cl223 Cl -0.0853(8) 0.0639(8) 0.4890(6) 0.1326 0.5000 Uani D . . 8 -1 . 
H241 H 1.1256 0.9367 0.1043 0.0401 1.0000 Uiso R . . . . . 
H251 H 1.1613 1.1159 0.1402 0.0710 1.0000 Uiso R . . . . . 
H252 H 1.1481 1.0724 0.0584 0.0711 1.0000 Uiso R . . . . . 
H253 H 1.0725 1.1389 0.0777 0.0711 1.0000 Uiso R . . . . . 
H261 H 0.7257 1.0527 0.1184 0.0651 1.0000 Uiso R . . . . . 
H262 H 0.6939 0.9622 0.1296 0.0651 1.0000 Uiso R . . . . . 
H263 H 0.6757 0.9782 0.0497 0.0650 1.0000 Uiso R . . . . . 
H291 H 1.3521 0.7992 0.2866 0.0570 1.0000 Uiso R . . . . . 
H292 H 1.3617 0.7017 0.2671 0.0571 1.0000 Uiso R . . . . . 
F300 F 0.5544(9) -0.0016(7) 0.4462(5) 0.0465 0.355(4) Uani D . P 1 1 . 
F301 F 0.7084(5) -0.0107(7) 0.4202(6) 0.0516 0.355(4) Uani D . P 1 1 . 
H301 H 1.4310 0.7630 0.3936 0.0650 1.0000 Uiso R . . . . . 
F302 F 0.5749(9) -0.1092(4) 0.3713(6) 0.0492 0.355(4) Uani D . P 1 1 . 
H302 H 1.3403 0.6835 0.3774 0.0650 1.0000 Uiso R . . . . . 
F303 F 0.6162(6) 0.0190(4) 0.4592(3) 0.0549 0.645(4) Uani D . P 1 2 . 
F304 F 0.6958(5) -0.0538(4) 0.3880(4) 0.0449 0.645(4) Uani D . P 1 2 . 
F305 F 0.5290(5) -0.0938(4) 0.3851(4) 0.0512 0.645(4) Uani D . P 1 2 . 
H311 H 1.3269 0.8129 0.4629 0.0710 1.0000 Uiso R . . . . . 
H312 H 1.2162 0.7618 0.4085 0.0709 1.0000 Uiso R . . . . . 
H321 H 1.3253 0.9004 0.3747 0.0571 1.0000 Uiso R . . . . . 
H322 H 1.2343 0.9112 0.4185 0.0569 1.0000 Uiso R . . . . . 
H361 H 1.2820 1.0300 0.3295 0.0621 1.0000 Uiso R . . . . . 
H362 H 1.2266 1.0642 0.2608 0.0620 1.0000 Uiso R . . . . . 
H363 H 1.2501 0.9709 0.2520 0.0620 1.0000 Uiso R . . . . . 
H371 H 1.0536 1.0949 0.2764 0.0429 1.0000 Uiso R . . . . . 
H391 H 0.8357 0.9258 0.3108 0.0391 1.0000 Uiso R . . . . . 
F400 F 0.9451(12) 0.2466(7) 0.4818(10) 0.0634 0.269(3) Uani D . P 2 1 . 
F401 F 1.0215(9) 0.3728(9) 0.5108(8) 0.0729 0.269(3) Uani D . P 2 1 . 
F402 F 0.9634(12) 0.3116(11) 0.3994(5) 0.0608 0.269(3) Uani D . P 2 1 . 
F403 F 0.9853(5) 0.3083(5) 0.5294(3) 0.0652 0.731(3) Uani D . P 2 2 . 
F404 F 1.0031(5) 0.3853(4) 0.4550(4) 0.0702 0.731(3) Uani D . P 2 2 . 
F405 F 0.9512(5) 0.2547(4) 0.4163(4) 0.0767 0.731(3) Uani D . P 2 2 . 
H411 H 0.9012 0.8107 0.3622 0.0540 1.0000 Uiso R . . . . . 
H412 H 0.9342 0.7594 0.2954 0.0541 1.0000 Uiso R . . . . . 
H413 H 1.0235 0.7937 0.3701 0.0540 1.0000 Uiso R . . . . . 
H421 H 0.8619 1.1190 0.2575 0.0772 1.0000 Uiso R . . . . . 
H422 H 0.8521 1.1144 0.3361 0.0771 1.0000 Uiso R . . . . . 
H423 H 0.7746 1.0517 0.2673 0.0770 1.0000 Uiso R . . . . . 
H451 H 1.0625 0.5406 0.3098 0.0581 1.0000 Uiso R . . . . . 
H452 H 1.1518 0.6200 0.3382 0.0580 1.0000 Uiso R . . . . . 
H453 H 1.0286 0.6287 0.3012 0.0581 1.0000 Uiso R . . . . . 
H461 H 1.0349 0.4630 0.1904 0.0380 1.0000 Uiso R . . . . . 
H481 H 1.0280 0.4115 0.0078 0.0760 1.0000 Uiso R . . . . . 
H482 H 1.1185 0.3719 0.0585 0.0761 1.0000 Uiso R . . . . . 
H483 H 1.0005 0.3745 0.0722 0.0759 1.0000 Uiso R . . . . . 
H491 H 1.1699 0.5433 0.0449 0.0510 1.0000 Uiso R . . . . . 
F500 F 0.3243(4) -0.0356(5) 0.1105(4) 0.0755 0.741(3) Uani D . P 3 1 . 
F501 F 0.4628(5) -0.1013(4) 0.1160(3) 0.0604 0.741(3) Uani D . P 3 1 . 
F502 F 0.4639(6) 0.0147(4) 0.0817(3) 0.0605 0.741(3) Uani D . P 3 1 . 
F503 F 0.3575(11) -0.0853(9) 0.1338(8) 0.0597 0.259(3) Uani D . P 3 2 . 
F504 F 0.4972(11) -0.0637(10) 0.0929(8) 0.0647 0.259(3) Uani D . P 3 2 . 
F505 F 0.3788(13) 0.0206(9) 0.0864(7) 0.0622 0.259(3) Uani D . P 3 2 . 
H511 H 1.2291 0.6978 0.0645 0.0780 1.0000 Uiso R . . . . . 
H512 H 1.3357 0.6847 0.1207 0.0780 1.0000 Uiso R . . . . . 
H513 H 1.2629 0.7510 0.1451 0.0778 1.0000 Uiso R . . . . . 
H571 H 0.1284 0.2497 0.3768 0.0321 1.0000 Uiso R . . . . . 
H591 H 0.4509 0.2286 0.4338 0.0298 1.0000 Uiso R . . . . . 
F600 F 0.7690(6) 0.5451(6) 0.5880(4) 0.0709 0.535(4) Uani D . P 4 1 . 
F601 F 0.6166(7) 0.4775(7) 0.5916(5) 0.0679 0.535(4) Uani D . P 4 1 . 
F602 F 0.6167(7) 0.5472(5) 0.5071(5) 0.0610 0.535(4) Uani D . P 4 1 . 
F603 F 0.7566(7) 0.5233(6) 0.6082(4) 0.0759 0.465(4) Uani D . P 4 2 . 
F604 F 0.5817(6) 0.4765(7) 0.5662(5) 0.0613 0.465(4) Uani D . P 4 2 . 
F605 F 0.6584(9) 0.5644(6) 0.5159(6) 0.0694 0.465(4) Uani D . P 4 2 . 
H611 H 0.3149 0.2838 0.2412 0.0282 1.0000 Uiso R . . . . . 
H641 H 0.5996 0.1362 0.3980 0.0299 1.0000 Uiso R . . . . . 
H661 H 0.5120 -0.0826 0.2494 0.0379 1.0000 Uiso R . . . . . 
H681 H 0.4583 0.1355 0.1883 0.0339 1.0000 Uiso R . . . . . 
F700 F 0.4893(7) 0.5526(5) 0.2364(4) 0.0735 0.556(4) Uani D . P 5 1 . 
F701 F 0.3506(5) 0.4727(6) 0.1593(5) 0.0785 0.556(4) Uani D . P 5 1 . 
F702 F 0.4820(8) 0.5252(6) 0.1220(5) 0.0770 0.556(4) Uani D . P 5 1 . 
F703 F 0.4328(9) 0.5369(7) 0.2316(5) 0.0788 0.444(4) Uani D . P 5 2 . 
F704 F 0.3651(6) 0.4610(7) 0.1236(6) 0.0742 0.444(4) Uani D . P 5 2 . 
F705 F 0.5163(8) 0.5447(7) 0.1485(6) 0.0735 0.444(4) Uani D . P 5 2 . 
H741 H 0.5399 0.3875 0.4366 0.0371 1.0000 Uiso R . . . . . 
H761 H 0.8620 0.4383 0.5398 0.0352 1.0000 Uiso R . . . . . 
H781 H 0.7498 0.2438 0.3679 0.0279 1.0000 Uiso R . . . . . 
F800 F 0.6517(7) 0.2257(5) 0.0580(5) 0.0625 0.494(4) Uani D . P 6 1 . 
F801 F 0.7944(7) 0.2520(6) 0.1507(5) 0.0618 0.494(4) Uani D . P 6 1 . 
H801 H 0.4529 0.3976 0.2711 0.0358 1.0000 Uiso R . . . . . 
F802 F 0.7594(8) 0.3425(6) 0.0839(5) 0.0617 0.494(4) Uani D . P 6 1 . 
F803 F 0.6904(8) 0.2065(4) 0.0795(5) 0.0635 0.506(4) Uani D . P 6 2 . 
F804 F 0.8159(6) 0.2980(6) 0.1574(4) 0.0630 0.506(4) Uani D . P 6 2 . 
F805 F 0.7151(8) 0.3315(6) 0.0624(5) 0.0561 0.506(4) Uani D . P 6 2 . 
H821 H 0.6034 0.4183 0.1120 0.0411 1.0000 Uiso R . . . . . 
H841 H 0.6468 0.2284 0.2160 0.0348 1.0000 Uiso R . . . . . 
F900 F 0.3527(7) 0.2641(5) 0.5415(5) 0.0536 0.494(4) Uani D . P 7 1 . 
F901 F 0.3054(7) 0.1334(4) 0.4876(5) 0.0582 0.494(4) Uani D . P 7 1 . 
F902 F 0.1805(6) 0.2134(6) 0.4986(6) 0.0523 0.494(4) Uani D . P 7 1 . 
F903 F 0.3702(6) 0.2336(6) 0.5412(5) 0.0513 0.506(4) Uani D . P 7 2 . 
F904 F 0.2552(7) 0.1269(4) 0.4735(5) 0.0582 0.506(4) Uani D . P 7 2 . 
F905 F 0.1970(6) 0.2444(6) 0.5078(6) 0.0555 0.506(4) Uani D . P 7 2 . 
H2131 H 0.1173 0.0640 0.5329 0.1760 0.5000 Uiso R . . 8 -1 . 
H2132 H 0.0736 0.0225 0.4486 0.1759 0.5000 Uiso R . . 8 -1 . 
loop_
_atom_site_aniso_label
_atom_site_aniso_U_11
_atom_site_aniso_U_22
_atom_site_aniso_U_33
_atom_site_aniso_U_23
_atom_site_aniso_U_13
_atom_site_aniso_U_12
Ir1 0.02208(12) 0.02290(12) 0.02094(12) 0.00490(9) 0.00607(9) 0.00223(9) 
C2 0.032(3) 0.034(4) 0.023(3) 0.003(3) 0.011(3) 0.003(3) 
C3 0.028(3) 0.029(3) 0.024(3) 0.009(3) 0.010(3) 0.005(3) 
C4 0.024(3) 0.027(3) 0.023(3) 0.012(3) 0.006(2) -0.002(3) 
N5 0.022(3) 0.029(3) 0.025(3) 0.012(2) 0.001(2) 0.000(2) 
C6 0.020(3) 0.028(3) 0.022(3) 0.007(3) 0.007(3) 0.000(3) 
N7 0.022(3) 0.032(3) 0.028(3) 0.012(2) 0.005(2) -0.001(2) 
C8 0.028(3) 0.030(3) 0.024(3) 0.012(3) 0.006(3) -0.001(3) 
C9 0.033(3) 0.034(4) 0.029(3) 0.004(3) 0.014(3) -0.003(3) 
C10 0.045(4) 0.045(4) 0.042(4) 0.002(3) 0.021(3) 0.000(4) 
C11 0.047(4) 0.044(4) 0.027(3) 0.011(3) 0.012(3) -0.011(3) 
C12 0.042(4) 0.036(4) 0.035(4) 0.016(3) 0.002(3) -0.008(3) 
C13 0.036(4) 0.028(4) 0.041(4) 0.013(3) 0.005(3) -0.005(3) 
C14 0.026(3) 0.025(3) 0.026(3) 0.005(3) 0.005(3) -0.004(3) 
C15 0.044(4) 0.035(4) 0.029(4) 0.003(3) 0.009(3) 0.004(3) 
C16 0.078(5) 0.058(5) 0.054(5) 0.034(4) 0.007(4) -0.009(5) 
C17 0.018(3) 0.052(4) 0.049(4) 0.021(4) 0.008(3) 0.002(3) 
C18 0.027(4) 0.077(5) 0.049(4) 0.024(4) -0.007(3) -0.020(4) 
C19 0.061(5) 0.087(6) 0.040(5) 0.009(5) -0.002(4) -0.028(5) 
C20 0.061(4) 0.065(5) 0.038(4) 0.028(4) -0.012(4) -0.028(4) 
C21 0.026(3) 0.042(4) 0.036(4) 0.011(3) 0.010(3) 0.001(3) 
C22 0.037(3) 0.027(3) 0.034(4) 0.012(3) 0.009(3) 0.002(3) 
C23 0.037(3) 0.029(3) 0.021(3) 0.007(3) 0.007(3) -0.004(3) 
C24 0.026(3) 0.038(4) 0.036(4) 0.007(3) 0.011(3) -0.003(3) 
C25 0.049(4) 0.038(4) 0.058(5) 0.018(4) 0.017(4) -0.009(4) 
C26 0.033(4) 0.038(4) 0.068(5) 0.025(4) 0.016(4) 0.009(3) 
C27 0.023(3) 0.030(4) 0.028(3) 0.010(3) 0.004(3) 0.000(3) 
N28 0.018(3) 0.037(3) 0.041(3) 0.013(3) 0.003(2) 0.005(2) 
C28 0.047(2) 0.071(3) 0.036(2) -0.009(2) 0.002(2) 0.007(2) 
C29 0.022(3) 0.057(5) 0.061(5) 0.017(4) 0.001(3) 0.008(3) 
C30 0.029(4) 0.054(5) 0.069(5) 0.022(4) -0.012(4) -0.005(4) 
C31 0.062(5) 0.061(5) 0.036(4) 0.014(4) -0.018(4) -0.004(5) 
C32 0.046(4) 0.042(4) 0.037(4) 0.003(4) -0.011(4) 0.001(4) 
N33 0.022(3) 0.029(3) 0.030(3) 0.005(2) -0.002(2) -0.003(2) 
C33 0.054(2) 0.070(3) 0.055(3) 0.019(2) 0.029(2) 0.007(2) 
C34 0.033(3) 0.026(3) 0.026(3) 0.003(3) 0.000(3) -0.001(3) 
C35 0.031(3) 0.032(4) 0.028(3) 0.007(3) 0.007(3) 0.003(3) 
C36 0.036(4) 0.038(4) 0.050(4) 0.016(3) 0.012(3) -0.003(3) 
C37 0.046(4) 0.025(3) 0.034(4) 0.005(3) 0.008(3) -0.003(3) 
C38 0.032(3) 0.027(3) 0.033(4) -0.006(3) 0.004(3) 0.004(3) 
C39 0.031(3) 0.036(4) 0.030(3) 0.004(3) 0.011(3) 0.004(3) 
C40 0.037(3) 0.028(3) 0.021(3) 0.006(3) 0.006(3) -0.001(3) 
C41 0.037(4) 0.043(4) 0.026(3) 0.011(3) 0.009(3) -0.002(3) 
C42 0.053(4) 0.034(4) 0.062(5) 0.000(4) 0.010(4) 0.013(4) 
C43 0.027(3) 0.036(4) 0.034(4) 0.010(3) 0.014(3) 0.013(3) 
C44 0.030(3) 0.031(3) 0.029(3) 0.008(3) 0.009(3) 0.013(3) 
C45 0.047(4) 0.040(4) 0.030(4) 0.010(3) 0.011(3) 0.003(3) 
C46 0.035(3) 0.034(4) 0.029(3) 0.012(3) 0.008(3) 0.015(3) 
C47 0.037(4) 0.036(4) 0.034(4) 0.009(3) 0.009(3) 0.018(3) 
C48 0.075(5) 0.044(4) 0.028(4) 0.002(3) 0.006(4) 0.028(4) 
C49 0.047(4) 0.059(5) 0.029(4) 0.013(3) 0.015(3) 0.032(4) 
C50 0.039(4) 0.041(4) 0.039(4) 0.021(3) 0.015(3) 0.022(3) 
C51 0.045(4) 0.063(5) 0.067(5) 0.028(4) 0.037(4) 0.019(4) 
F52 0.043(3) 0.076(3) 0.041(3) 0.034(2) 0.008(2) 0.018(2) 
C52 0.023(2) 0.084(3) 0.071(3) 0.012(3) 0.012(2) 0.016(2) 
C53 0.026(3) 0.030(4) 0.041(4) 0.011(3) 0.005(3) 0.004(3) 
F54 0.031(2) 0.048(3) 0.073(3) 0.026(2) -0.018(2) -0.007(2) 
C55 0.035(2) 0.090(3) 0.042(2) 0.034(2) 0.0126(19) 0.019(2) 
F55 0.047(3) 0.051(3) 0.059(3) 0.011(2) 0.004(2) 0.032(2) 
C56 0.022(3) 0.017(3) 0.024(3) 0.006(2) 0.001(2) 0.003(2) 
C57 0.020(3) 0.029(3) 0.029(3) 0.009(3) 0.005(3) 0.002(3) 
C58 0.017(3) 0.031(3) 0.029(3) 0.005(3) 0.006(3) 0.004(3) 
C59 0.022(3) 0.027(3) 0.026(3) 0.005(3) 0.006(3) 0.004(3) 
C60 0.021(3) 0.019(3) 0.022(3) 0.001(2) 0.006(2) 0.005(2) 
C61 0.024(3) 0.024(3) 0.025(3) 0.011(3) 0.006(3) 0.002(3) 
B62 0.024(3) 0.024(3) 0.024(3) 0.008(3) 0.006(3) 0.006(3) 
C63 0.017(3) 0.026(3) 0.025(3) 0.003(3) 0.008(2) 0.001(2) 
C64 0.025(3) 0.026(3) 0.022(3) 0.003(3) 0.006(3) 0.003(3) 
C65 0.025(3) 0.021(3) 0.035(3) 0.007(3) 0.013(3) 0.003(3) 
C66 0.029(3) 0.025(3) 0.040(4) 0.002(3) 0.011(3) 0.007(3) 
C67 0.020(3) 0.035(4) 0.034(4) 0.004(3) 0.003(3) 0.003(3) 
C68 0.026(3) 0.030(3) 0.028(3) 0.008(3) 0.004(3) 0.008(3) 
C69 0.048(2) 0.043(2) 0.045(2) 0.022(2) 0.014(2) 0.010(2) 
C72 0.056(2) 0.051(3) 0.059(3) -0.020(2) -0.002(2) 0.019(2) 
C73 0.023(3) 0.020(3) 0.021(3) 0.004(2) 0.008(2) 0.006(2) 
C74 0.029(3) 0.025(3) 0.037(4) 0.003(3) 0.008(3) 0.004(3) 
C75 0.029(3) 0.030(4) 0.026(3) -0.006(3) -0.002(3) 0.002(3) 
C76 0.025(3) 0.026(3) 0.035(4) 0.009(3) 0.003(3) -0.002(3) 
C77 0.015(3) 0.030(3) 0.032(3) 0.008(3) 0.008(3) 0.007(3) 
C78 0.025(3) 0.025(3) 0.026(3) 0.008(3) 0.013(3) 0.007(3) 
C79 0.019(3) 0.021(3) 0.030(3) 0.008(3) 0.007(3) 0.002(2) 
C80 0.025(3) 0.022(3) 0.042(4) 0.008(3) 0.007(3) 0.000(3) 
C81 0.029(3) 0.029(4) 0.046(4) 0.014(3) 0.004(3) -0.005(3) 
C82 0.029(3) 0.035(4) 0.034(4) 0.017(3) -0.004(3) -0.008(3) 
C83 0.024(3) 0.042(4) 0.027(3) 0.005(3) 0.003(3) -0.005(3) 
C84 0.024(3) 0.034(4) 0.028(3) 0.007(3) 0.006(3) 0.000(3) 
C85 0.040(2) 0.056(3) 0.122(3) 0.047(2) 0.009(3) 0.011(2) 
Cl123 0.162(5) 0.160(5) 0.058(3) -0.016(4) 0.032(5) -0.086(5) 
C213 0.116(4) 0.165(5) 0.053(4) -0.022(4) 0.041(5) -0.077(5) 
Cl223 0.105(4) 0.192(5) 0.064(4) -0.039(4) 0.034(4) -0.066(5) 
F300 0.053(4) 0.051(4) 0.042(4) 0.022(4) 0.015(4) 0.012(4) 
F301 0.049(3) 0.055(4) 0.053(4) 0.032(4) 0.002(4) 0.006(4) 
F302 0.059(4) 0.038(4) 0.051(4) 0.015(4) 0.010(4) 0.013(4) 
F303 0.078(4) 0.043(3) 0.042(3) 0.014(3) 0.006(3) 0.013(3) 
F304 0.040(3) 0.059(4) 0.045(3) 0.024(3) 0.013(3) 0.024(3) 
F305 0.045(3) 0.048(3) 0.064(4) 0.035(3) 0.006(3) -0.001(3) 
F400 0.025(4) 0.087(4) 0.077(5) 0.017(4) 0.009(4) 0.020(4) 
F401 0.031(4) 0.092(5) 0.082(5) -0.003(5) 0.004(4) 0.015(4) 
F402 0.024(4) 0.089(5) 0.072(4) 0.015(5) 0.016(4) 0.019(5) 
F403 0.030(3) 0.101(4) 0.064(3) 0.022(3) 0.004(3) 0.023(3) 
F404 0.028(3) 0.090(4) 0.093(4) 0.027(3) 0.013(3) 0.003(3) 
F405 0.027(3) 0.094(4) 0.089(4) -0.022(3) 0.007(3) 0.019(3) 
F500 0.033(3) 0.113(4) 0.051(3) -0.032(3) -0.003(3) 0.007(3) 
F501 0.070(3) 0.060(3) 0.037(3) -0.015(3) 0.005(3) 0.015(3) 
F502 0.062(3) 0.075(4) 0.032(3) -0.005(3) 0.004(3) 0.004(3) 
F503 0.054(4) 0.073(5) 0.037(5) -0.003(4) -0.003(4) 0.000(4) 
F504 0.050(4) 0.083(5) 0.043(5) -0.018(4) 0.004(4) 0.007(4) 
F505 0.057(4) 0.071(5) 0.038(5) -0.006(4) -0.011(4) 0.004(4) 
F600 0.060(4) 0.053(4) 0.071(4) -0.028(4) -0.008(4) 0.017(3) 
F601 0.073(4) 0.064(4) 0.049(4) -0.023(4) 0.007(3) 0.018(4) 
F602 0.052(4) 0.039(4) 0.072(4) -0.015(3) -0.002(4) 0.014(3) 
F603 0.067(4) 0.061(4) 0.068(4) -0.031(4) -0.013(4) 0.024(4) 
F604 0.060(4) 0.062(4) 0.045(4) -0.027(4) 0.006(3) 0.024(4) 
F605 0.061(4) 0.046(4) 0.078(4) -0.016(4) -0.007(4) 0.019(4) 
F700 0.041(4) 0.050(4) 0.133(5) 0.034(3) 0.012(4) 0.024(4) 
F701 0.035(3) 0.063(4) 0.142(5) 0.053(4) 0.005(4) 0.013(3) 
F702 0.056(4) 0.061(4) 0.118(4) 0.057(4) 0.003(4) 0.004(4) 
F703 0.055(4) 0.060(4) 0.128(5) 0.041(4) 0.014(4) 0.024(4) 
F704 0.035(4) 0.064(4) 0.125(5) 0.036(4) 0.007(4) 0.022(4) 
F705 0.043(4) 0.057(4) 0.123(5) 0.054(4) 0.001(4) 0.003(4) 
F800 0.058(4) 0.067(4) 0.061(4) 0.005(4) 0.018(4) 0.019(4) 
F801 0.053(4) 0.085(5) 0.060(4) 0.025(4) 0.031(3) 0.016(4) 
F802 0.061(4) 0.072(4) 0.062(4) 0.013(4) 0.040(4) -0.006(4) 
F803 0.063(4) 0.065(4) 0.072(4) 0.007(4) 0.038(4) 0.017(4) 
F804 0.053(3) 0.083(4) 0.061(4) 0.017(4) 0.026(3) 0.013(4) 
F805 0.052(4) 0.078(4) 0.048(4) 0.023(3) 0.026(3) 0.000(4) 
F900 0.040(4) 0.096(5) 0.034(4) 0.031(4) 0.010(3) 0.019(4) 
F901 0.045(4) 0.089(4) 0.053(4) 0.044(4) 0.009(4) 0.024(4) 
F902 0.033(3) 0.095(5) 0.044(4) 0.039(4) 0.019(3) 0.009(4) 
F903 0.031(3) 0.095(4) 0.038(4) 0.034(4) 0.006(3) 0.026(4) 
F904 0.049(4) 0.088(4) 0.050(4) 0.046(4) 0.011(4) 0.011(4) 
F905 0.038(3) 0.097(5) 0.044(4) 0.029(4) 0.020(3) 0.020(4) 

_refine_ls_extinction_method 
    'None'
_oxford_refine_ls_scale 0.082992(11) 
loop_
 _geom_bond_atom_site_label_1
 _geom_bond_site_symmetry_1
 _geom_bond_atom_site_label_2
 _geom_bond_site_symmetry_2
 _geom_bond_distance
 _geom_bond_publ_flag
Ir1 . C2 . 2.063(6)    yes
Ir1 . C6 . 2.073(7)    yes
Ir1 . H11 . 1.660    no
Ir1 . C27 . 2.050(7)    yes
Ir1 . H412 . 1.981    no
C2 . C3 . 1.487(9)    yes
C2 . H21 . 0.972    no
C2 . H22 . 0.977    no
C3 . C4 . 1.381(9)    yes
C3 . C24 . 1.397(9)    yes
C4 . N5 . 1.450(8)    yes
C4 . C21 . 1.403(10)    yes
N5 . C6 . 1.362(8)    yes
N5 . C20 . 1.508(9)    yes
C6 . N7 . 1.348(8)    yes
N7 . C8 . 1.461(8)    yes
N7 . C17 . 1.475(8)    yes
C8 . C9 . 1.404(9)    yes
C8 . C14 . 1.393(10)    yes
C9 . C10 . 1.511(10)    yes
C9 . C11 . 1.401(10)    yes
C10 . H101 . 0.963    no
C10 . H102 . 0.962    no
C10 . H103 . 0.966    no
C11 . C12 . 1.374(11)    yes
C11 . H111 . 0.935    no
C12 . C13 . 1.380(11)    yes
C12 . C16 . 1.505(11)    yes
C13 . C14 . 1.389(9)    yes
C13 . H131 . 0.936    no
C14 . C15 . 1.496(9)    yes
C15 . H151 . 0.962    no
C15 . H152 . 0.963    no
C15 . H153 . 0.962    no
C16 . H161 . 0.960    no
C16 . H162 . 0.962    no
C16 . H163 . 0.961    no
C17 . C18 . 1.506(11)    yes
C17 . H171 . 0.970    no
C17 . H172 . 0.975    no
C18 . C19 . 1.544(12)    yes
C18 . H181 . 0.970    no
C18 . H182 . 0.973    no
C19 . C20 . 1.442(13)    yes
C19 . H191 . 0.979    no
C19 . H192 . 0.986    no
C20 . H201 . 0.979    no
C20 . H202 . 0.974    no
C21 . C22 . 1.396(10)    yes
C21 . C26 . 1.523(10)    yes
C22 . C23 . 1.382(10)    yes
C22 . H221 . 0.939    no
C23 . C24 . 1.403(10)    yes
C23 . C25 . 1.495(10)    yes
C24 . H241 . 0.923    no
C25 . H251 . 0.962    no
C25 . H252 . 0.960    no
C25 . H253 . 0.957    no
C26 . H261 . 0.969    no
C26 . H262 . 0.964    no
C26 . H263 . 0.970    no
C27 . N28 . 1.338(9)    yes
C27 . N33 . 1.354(9)    yes
N28 . C29 . 1.479(9)    yes
N28 . C43 . 1.445(9)    yes
C28 . C67 . 1.488(8)    yes
C28 . F500 . 1.327(5)    yes
C28 . F501 . 1.334(5)    yes
C28 . F502 . 1.336(5)    yes
C28 . C67 . 1.488(8)    yes
C28 . F503 . 1.348(5)    yes
C28 . F504 . 1.325(5)    yes
C28 . F505 . 1.333(5)    yes
C29 . C30 . 1.520(12)    yes
C29 . H291 . 0.975    no
C29 . H292 . 0.974    no
C30 . C31 . 1.512(13)    yes
C30 . H301 . 0.970    no
C30 . H302 . 0.978    no
C31 . C32 . 1.520(12)    yes
C31 . H311 . 0.969    no
C31 . H312 . 0.971    no
C32 . N33 . 1.488(9)    yes
C32 . H321 . 0.970    no
C32 . H322 . 0.970    no
N33 . C34 . 1.450(9)    yes
C33 . C83 . 1.479(8)    yes
C33 . F800 . 1.350(5)    yes
C33 . F801 . 1.345(5)    yes
C33 . F802 . 1.340(5)    yes
C33 . C83 . 1.479(8)    yes
C33 . F803 . 1.334(5)    yes
C33 . F804 . 1.349(5)    yes
C33 . F805 . 1.347(5)    yes
C34 . C35 . 1.406(10)    yes
C34 . C40 . 1.406(10)    yes
C35 . C36 . 1.507(10)    yes
C35 . C37 . 1.381(10)    yes
C36 . H361 . 0.960    no
C36 . H362 . 0.962    no
C36 . H363 . 0.960    no
C37 . C38 . 1.395(10)    yes
C37 . H371 . 0.929    no
C38 . C39 . 1.387(10)    yes
C38 . C42 . 1.508(10)    yes
C39 . C40 . 1.403(10)    yes
C39 . H391 . 0.937    no
C40 . C41 . 1.495(9)    yes
C41 . H411 . 0.963    no
C41 . H412 . 0.965    no
C41 . H413 . 0.966    no
C42 . H421 . 0.962    no
C42 . H422 . 0.962    no
C42 . H423 . 0.960    no
C43 . C44 . 1.383(10)    yes
C43 . C50 . 1.396(10)    yes
C44 . C45 . 1.521(10)    yes
C44 . C46 . 1.374(10)    yes
C45 . H451 . 0.959    no
C45 . H452 . 0.963    no
C45 . H453 . 0.967    no
C46 . C47 . 1.387(10)    yes
C46 . H461 . 0.929    no
C47 . C48 . 1.505(11)    yes
C47 . C49 . 1.391(11)    yes
C48 . H481 . 0.965    no
C48 . H482 . 0.966    no
C48 . H483 . 0.966    no
C49 . C50 . 1.398(11)    yes
C49 . H491 . 0.929    no
C50 . C51 . 1.536(11)    yes
C51 . H511 . 0.963    no
C51 . H512 . 0.959    no
C51 . H513 . 0.958    no
F52 . C53 . 1.333(8)    yes
C52 . C77 . 1.476(7)    yes
C52 . F400 . 1.345(5)    yes
C52 . F401 . 1.332(5)    yes
C52 . F402 . 1.338(5)    yes
C52 . C77 . 1.476(7)    yes
C52 . F403 . 1.340(5)    yes
C52 . F404 . 1.342(5)    yes
C52 . F405 . 1.336(5)    yes
C53 . F54 . 1.344(8)    yes
C53 . F55 . 1.338(8)    yes
C53 . C56 . 1.493(9)    yes
C55 . C58 . 1.484(7)    yes
C55 . F900 . 1.353(5)    yes
C55 . F901 . 1.350(5)    yes
C55 . F902 . 1.351(5)    yes
C55 . C58 . 1.484(7)    yes
C55 . F903 . 1.348(5)    yes
C55 . F904 . 1.355(5)    yes
C55 . F905 . 1.353(5)    yes
C56 . C57 . 1.394(9)    yes
C56 . C61 . 1.377(9)    yes
C57 . C58 . 1.389(9)    yes
C57 . H571 . 0.929    no
C58 . C59 . 1.384(9)    yes
C59 . C60 . 1.412(9)    yes
C59 . H591 . 0.931    no
C60 . C61 . 1.400(8)    yes
C60 . B62 . 1.644(9)    yes
C61 . H611 . 0.929    no
B62 . C63 . 1.617(10)    yes
B62 . C73 . 1.642(10)    yes
B62 . C79 . 1.646(10)    yes
C63 . C64 . 1.409(9)    yes
C63 . C68 . 1.409(9)    yes
C64 . C65 . 1.391(9)    yes
C64 . H641 . 0.929    no
C65 . C66 . 1.392(9)    yes
C65 . C69 . 1.485(7)    yes
C66 . C67 . 1.388(10)    yes
C66 . H661 . 0.935    no
C67 . C68 . 1.399(10)    yes
C68 . H681 . 0.929    no
C69 . F300 . 1.343(5)    yes
C69 . F301 . 1.333(5)    yes
C69 . F302 . 1.336(5)    yes
C69 . F303 . 1.341(5)    yes
C69 . F304 . 1.342(5)    yes
C69 . F305 . 1.338(5)    yes
C72 . C75 . 1.505(8)    yes
C72 . F600 . 1.356(5)    yes
C72 . F601 . 1.344(5)    yes
C72 . F602 . 1.355(5)    yes
C72 . C75 . 1.505(8)    yes
C72 . F603 . 1.356(5)    yes
C72 . F604 . 1.361(5)    yes
C72 . F605 . 1.348(5)    yes
C73 . C74 . 1.399(9)    yes
C73 . C78 . 1.397(8)    yes
C74 . C75 . 1.393(9)    yes
C74 . H741 . 0.933    no
C75 . C76 . 1.368(10)    yes
C76 . C77 . 1.377(9)    yes
C76 . H761 . 0.935    no
C77 . C78 . 1.387(9)    yes
C78 . H781 . 0.930    no
C79 . C80 . 1.404(9)    yes
C79 . C84 . 1.395(9)    yes
C80 . C81 . 1.402(10)    yes
C80 . H801 . 0.936    no
C81 . C82 . 1.382(11)    yes
C81 . C85 . 1.477(8)    yes
C82 . C83 . 1.386(10)    yes
C82 . H821 . 0.931    no
C83 . C84 . 1.392(9)    yes
C84 . H841 . 0.930    no
C85 . F700 . 1.354(5)    yes
C85 . F701 . 1.346(5)    yes
C85 . F702 . 1.347(5)    yes
C85 . F703 . 1.343(5)    yes
C85 . F704 . 1.355(5)    yes
C85 . F705 . 1.349(5)    yes
Cl123 . C213 . 1.8346(9)    yes
C213 . Cl223 . 1.8346(9)    yes
C213 . H2131 . 0.995    no
C213 . H2132 . 1.003    no
loop_
 _geom_angle_atom_site_label_1
 _geom_angle_site_symmetry_1
 _geom_angle_atom_site_label_2
 _geom_angle_site_symmetry_2
 _geom_angle_atom_site_label_3
 _geom_angle_site_symmetry_3
 _geom_angle
 _geom_angle_publ_flag
C2 . Ir1 . C6 . 82.8(3)    yes
C2 . Ir1 . H11 . 83.9    no
C6 . Ir1 . H11 . 82.9    no
C2 . Ir1 . C27 . 95.0(3)    yes
C6 . Ir1 . C27 . 177.6(3)    yes
H11 . Ir1 . C27 . 96.1    no
C2 . Ir1 . H412 . 177.8    no
C6 . Ir1 . H412 . 95.1    no
H11 . Ir1 . H412 . 95.1    no
C27 . Ir1 . H412 . 87.1    no
Ir1 . C2 . C3 . 103.8(4)    yes
Ir1 . C2 . H21 . 110.4    no
C3 . C2 . H21 . 111.7    no
Ir1 . C2 . H22 . 111.5    no
C3 . C2 . H22 . 110.1    no
H21 . C2 . H22 . 109.2    no
C2 . C3 . C4 . 119.7(6)    yes
C2 . C3 . C24 . 122.1(6)    yes
C4 . C3 . C24 . 118.1(6)    yes
C3 . C4 . N5 . 119.1(6)    yes
C3 . C4 . C21 . 121.5(6)    yes
N5 . C4 . C21 . 119.3(6)    yes
C4 . N5 . C6 . 118.2(5)    yes
C4 . N5 . C20 . 112.0(5)    yes
C6 . N5 . C20 . 126.4(6)    yes
Ir1 . C6 . N5 . 120.5(5)    yes
Ir1 . C6 . N7 . 123.5(5)    yes
N5 . C6 . N7 . 115.8(6)    yes
C6 . N7 . C8 . 119.3(6)    yes
C6 . N7 . C17 . 124.7(6)    yes
C8 . N7 . C17 . 115.2(5)    yes
N7 . C8 . C9 . 117.7(6)    yes
N7 . C8 . C14 . 120.6(6)    yes
C9 . C8 . C14 . 121.4(6)    yes
C8 . C9 . C10 . 122.6(7)    yes
C8 . C9 . C11 . 117.4(7)    yes
C10 . C9 . C11 . 120.0(7)    yes
C9 . C10 . H101 . 109.2    no
C9 . C10 . H102 . 109.3    no
H101 . C10 . H102 . 109.6    no
C9 . C10 . H103 . 109.9    no
H101 . C10 . H103 . 109.3    no
H102 . C10 . H103 . 109.6    no
C9 . C11 . C12 . 122.4(7)    yes
C9 . C11 . H111 . 118.8    no
C12 . C11 . H111 . 118.8    no
C11 . C12 . C13 . 117.9(7)    yes
C11 . C12 . C16 . 121.3(8)    yes
C13 . C12 . C16 . 120.7(8)    yes
C12 . C13 . C14 . 122.9(7)    yes
C12 . C13 . H131 . 118.4    no
C14 . C13 . H131 . 118.7    no
C8 . C14 . C13 . 117.6(7)    yes
C8 . C14 . C15 . 122.4(6)    yes
C13 . C14 . C15 . 120.0(7)    yes
C14 . C15 . H151 . 109.1    no
C14 . C15 . H152 . 109.5    no
H151 . C15 . H152 . 109.9    no
C14 . C15 . H153 . 110.0    no
H151 . C15 . H153 . 109.0    no
H152 . C15 . H153 . 109.3    no
C12 . C16 . H161 . 109.8    no
C12 . C16 . H162 . 110.3    no
H161 . C16 . H162 . 108.9    no
C12 . C16 . H163 . 110.0    no
H161 . C16 . H163 . 108.8    no
H162 . C16 . H163 . 109.1    no
N7 . C17 . C18 . 112.7(7)    yes
N7 . C17 . H171 . 108.7    no
C18 . C17 . H171 . 108.9    no
N7 . C17 . H172 . 108.3    no
C18 . C17 . H172 . 108.1    no
H171 . C17 . H172 . 110.0    no
C17 . C18 . C19 . 110.2(7)    yes
C17 . C18 . H181 . 109.3    no
C19 . C18 . H181 . 110.1    no
C17 . C18 . H182 . 108.6    no
C19 . C18 . H182 . 109.4    no
H181 . C18 . H182 . 109.2    no
C18 . C19 . C20 . 112.9(9)    yes
C18 . C19 . H191 . 108.2    no
C20 . C19 . H191 . 108.7    no
C18 . C19 . H192 . 109.0    no
C20 . C19 . H192 . 108.4    no
H191 . C19 . H192 . 109.7    no
N5 . C20 . C19 . 117.7(8)    yes
N5 . C20 . H201 . 108.2    no
C19 . C20 . H201 . 106.5    no
N5 . C20 . H202 . 106.8    no
C19 . C20 . H202 . 107.6    no
H201 . C20 . H202 . 109.9    no
C4 . C21 . C22 . 118.0(7)    yes
C4 . C21 . C26 . 122.6(7)    yes
C22 . C21 . C26 . 119.4(7)    yes
C21 . C22 . C23 . 122.8(7)    yes
C21 . C22 . H221 . 118.6    no
C23 . C22 . H221 . 118.6    no
C22 . C23 . C24 . 116.8(6)    yes
C22 . C23 . C25 . 122.9(7)    yes
C24 . C23 . C25 . 120.3(7)    yes
C23 . C24 . C3 . 122.7(7)    yes
C23 . C24 . H241 . 118.9    no
C3 . C24 . H241 . 118.4    no
C23 . C25 . H251 . 110.7    no
C23 . C25 . H252 . 109.9    no
H251 . C25 . H252 . 109.1    no
C23 . C25 . H253 . 109.4    no
H251 . C25 . H253 . 108.9    no
H252 . C25 . H253 . 108.8    no
C21 . C26 . H261 . 109.1    no
C21 . C26 . H262 . 110.0    no
H261 . C26 . H262 . 108.8    no
C21 . C26 . H263 . 110.5    no
H261 . C26 . H263 . 109.0    no
H262 . C26 . H263 . 109.3    no
Ir1 . C27 . N28 . 130.8(5)    yes
Ir1 . C27 . N33 . 110.1(5)    yes
N28 . C27 . N33 . 119.1(6)    yes
C27 . N28 . C29 . 123.2(7)    yes
C27 . N28 . C43 . 119.9(6)    yes
C29 . N28 . C43 . 116.7(6)    yes
C67 . C28 . F500 . 113.0(5)    yes
C67 . C28 . F501 . 112.8(5)    yes
F500 . C28 . F501 . 105.64(5)    yes
C67 . C28 . F502 . 113.5(5)    yes
F500 . C28 . F502 . 105.61(5)    yes
F501 . C28 . F502 . 105.57(5)    yes
C67 . C28 . F503 . 104.0(7)    yes
C67 . C28 . F504 . 119.8(8)    yes
F503 . C28 . F504 . 105.60(5)    yes
C67 . C28 . F505 . 115.0(8)    yes
F503 . C28 . F505 . 105.59(5)    yes
F504 . C28 . F505 . 105.62(5)    yes
N28 . C29 . C30 . 113.7(7)    yes
N28 . C29 . H291 . 108.6    no
C30 . C29 . H291 . 108.9    no
N28 . C29 . H292 . 107.8    no
C30 . C29 . H292 . 108.2    no
H291 . C29 . H292 . 109.6    no
C29 . C30 . C31 . 111.0(7)    yes
C29 . C30 . H301 . 108.2    no
C31 . C30 . H301 . 109.2    no
C29 . C30 . H302 . 109.2    no
C31 . C30 . H302 . 109.8    no
H301 . C30 . H302 . 109.4    no
C30 . C31 . C32 . 114.3(8)    yes
C30 . C31 . H311 . 107.4    no
C32 . C31 . H311 . 108.2    no
C30 . C31 . H312 . 109.2    no
C32 . C31 . H312 . 108.2    no
H311 . C31 . H312 . 109.5    no
C31 . C32 . N33 . 112.2(7)    yes
C31 . C32 . H321 . 109.6    no
N33 . C32 . H321 . 109.2    no
C31 . C32 . H322 . 108.8    no
N33 . C32 . H322 . 107.5    no
H321 . C32 . H322 . 109.6    no
C32 . N33 . C27 . 130.2(6)    yes
C32 . N33 . C34 . 116.6(6)    yes
C27 . N33 . C34 . 111.1(5)    yes
C83 . C33 . F800 . 107.3(6)    yes
C83 . C33 . F801 . 113.6(6)    yes
F800 . C33 . F801 . 106.21(5)    yes
C83 . C33 . F802 . 116.6(6)    yes
F800 . C33 . F802 . 106.23(5)    yes
F801 . C33 . F802 . 106.24(5)    yes
C83 . C33 . F803 . 117.3(6)    yes
C83 . C33 . F804 . 109.4(6)    yes
F803 . C33 . F804 . 106.26(5)    yes
C83 . C33 . F805 . 110.8(6)    yes
F803 . C33 . F805 . 106.24(5)    yes
F804 . C33 . F805 . 106.23(5)    yes
N33 . C34 . C35 . 119.6(6)    yes
N33 . C34 . C40 . 118.7(6)    yes
C35 . C34 . C40 . 121.7(7)    yes
C34 . C35 . C36 . 121.6(7)    yes
C34 . C35 . C37 . 117.6(7)    yes
C36 . C35 . C37 . 120.8(7)    yes
C35 . C36 . H361 . 110.1    no
C35 . C36 . H362 . 109.9    no
H361 . C36 . H362 . 109.4    no
C35 . C36 . H363 . 109.6    no
H361 . C36 . H363 . 108.5    no
H362 . C36 . H363 . 109.3    no
C35 . C37 . C38 . 123.1(7)    yes
C35 . C37 . H371 . 118.5    no
C38 . C37 . H371 . 118.4    no
C37 . C38 . C39 . 117.7(7)    yes
C37 . C38 . C42 . 121.2(7)    yes
C39 . C38 . C42 . 121.1(7)    yes
C38 . C39 . C40 . 122.3(7)    yes
C38 . C39 . H391 . 119.3    no
C40 . C39 . H391 . 118.4    no
C34 . C40 . C39 . 117.6(6)    yes
C34 . C40 . C41 . 121.6(7)    yes
C39 . C40 . C41 . 120.7(7)    yes
C40 . C41 . H411 . 109.7    no
C40 . C41 . H412 . 111.2    no
H411 . C41 . H412 . 108.5    no
C40 . C41 . H413 . 110.0    no
H411 . C41 . H413 . 108.7    no
H412 . C41 . H413 . 108.7    no
C38 . C42 . H421 . 109.9    no
C38 . C42 . H422 . 109.7    no
H421 . C42 . H422 . 109.0    no
C38 . C42 . H423 . 110.4    no
H421 . C42 . H423 . 108.7    no
H422 . C42 . H423 . 109.3    no
N28 . C43 . C44 . 120.7(6)    yes
N28 . C43 . C50 . 118.6(7)    yes
C44 . C43 . C50 . 120.7(7)    yes
C43 . C44 . C45 . 121.1(7)    yes
C43 . C44 . C46 . 118.9(7)    yes
C45 . C44 . C46 . 120.0(7)    yes
C44 . C45 . H451 . 109.8    no
C44 . C45 . H452 . 109.9    no
H451 . C45 . H452 . 108.9    no
C44 . C45 . H453 . 109.8    no
H451 . C45 . H453 . 108.7    no
H452 . C45 . H453 . 109.6    no
C44 . C46 . C47 . 123.1(7)    yes
C44 . C46 . H461 . 118.4    no
C47 . C46 . H461 . 118.5    no
C46 . C47 . C48 . 122.0(8)    yes
C46 . C47 . C49 . 116.9(7)    yes
C48 . C47 . C49 . 121.1(7)    yes
C47 . C48 . H481 . 110.0    no
C47 . C48 . H482 . 109.3    no
H481 . C48 . H482 . 110.1    no
C47 . C48 . H483 . 108.4    no
H481 . C48 . H483 . 109.6    no
H482 . C48 . H483 . 109.4    no
C47 . C49 . C50 . 121.9(7)    yes
C47 . C49 . H491 . 119.1    no
C50 . C49 . H491 . 119.0    no
C49 . C50 . C43 . 118.5(7)    yes
C49 . C50 . C51 . 118.6(7)    yes
C43 . C50 . C51 . 123.0(7)    yes
C50 . C51 . H511 . 109.8    no
C50 . C51 . H512 . 110.1    no
H511 . C51 . H512 . 109.4    no
C50 . C51 . H513 . 109.3    no
H511 . C51 . H513 . 109.5    no
H512 . C51 . H513 . 108.8    no
C77 . C52 . F400 . 108.4(7)    yes
C77 . C52 . F401 . 122.5(7)    yes
F400 . C52 . F401 . 104.51(5)    yes
C77 . C52 . F402 . 110.9(7)    yes
F400 . C52 . F402 . 104.50(5)    yes
F401 . C52 . F402 . 104.52(5)    yes
C77 . C52 . F403 . 114.0(5)    yes
C77 . C52 . F404 . 112.9(5)    yes
F403 . C52 . F404 . 104.48(5)    yes
C77 . C52 . F405 . 115.3(5)    yes
F403 . C52 . F405 . 104.53(5)    yes
F404 . C52 . F405 . 104.51(5)    yes
F52 . C53 . F54 . 105.9(6)    yes
F52 . C53 . F55 . 106.1(6)    yes
F54 . C53 . F55 . 105.6(6)    yes
F52 . C53 . C56 . 113.0(6)    yes
F54 . C53 . C56 . 112.9(6)    yes
F55 . C53 . C56 . 112.6(6)    yes
C58 . C55 . F900 . 109.3(6)    yes
C58 . C55 . F901 . 112.9(6)    yes
F900 . C55 . F901 . 105.92(5)    yes
C58 . C55 . F902 . 116.2(6)    yes
F900 . C55 . F902 . 105.93(5)    yes
F901 . C55 . F902 . 105.92(5)    yes
C58 . C55 . F903 . 116.2(6)    yes
C58 . C55 . F904 . 110.8(5)    yes
F903 . C55 . F904 . 105.92(5)    yes
C58 . C55 . F905 . 111.4(6)    yes
F903 . C55 . F905 . 105.93(5)    yes
F904 . C55 . F905 . 105.93(5)    yes
C53 . C56 . C57 . 117.2(6)    yes
C53 . C56 . C61 . 122.3(6)    yes
C57 . C56 . C61 . 120.5(6)    yes
C56 . C57 . C58 . 118.2(6)    yes
C56 . C57 . H571 . 120.9    no
C58 . C57 . H571 . 121.0    no
C55 . C58 . C57 . 120.6(5)    yes
C55 . C58 . C59 . 118.6(6)    yes
C57 . C58 . C59 . 120.8(6)    yes
C58 . C59 . C60 . 122.2(6)    yes
C58 . C59 . H591 . 118.9    no
C60 . C59 . H591 . 118.9    no
C59 . C60 . C61 . 115.2(6)    yes
C59 . C60 . B62 . 118.6(5)    yes
C61 . C60 . B62 . 125.8(6)    yes
C60 . C61 . C56 . 123.0(6)    yes
C60 . C61 . H611 . 118.6    no
C56 . C61 . H611 . 118.3    no
C60 . B62 . C63 . 103.7(5)    yes
C60 . B62 . C73 . 111.2(5)    yes
C63 . B62 . C73 . 113.4(5)    yes
C60 . B62 . C79 . 113.9(5)    yes
C63 . B62 . C79 . 112.0(5)    yes
C73 . B62 . C79 . 102.9(5)    yes
B62 . C63 . C64 . 122.5(6)    yes
B62 . C63 . C68 . 122.0(6)    yes
C64 . C63 . C68 . 114.7(6)    yes
C63 . C64 . C65 . 123.0(6)    yes
C63 . C64 . H641 . 118.8    no
C65 . C64 . H641 . 118.2    no
C64 . C65 . C66 . 120.8(6)    yes
C64 . C65 . C69 . 120.8(6)    yes
C66 . C65 . C69 . 118.5(6)    yes
C65 . C66 . C67 . 117.9(6)    yes
C65 . C66 . H661 . 121.3    no
C67 . C66 . H661 . 120.8    no
C28 . C67 . C66 . 120.2(6)    yes
C28 . C67 . C68 . 118.9(6)    yes
C66 . C67 . C68 . 120.9(7)    yes
C63 . C68 . C67 . 122.6(6)    yes
C63 . C68 . H681 . 118.6    no
C67 . C68 . H681 . 118.7    no
C65 . C69 . F300 . 109.4(6)    yes
C65 . C69 . F301 . 113.4(6)    yes
F300 . C69 . F301 . 105.70(5)    yes
C65 . C69 . F302 . 116.2(6)    yes
F300 . C69 . F302 . 105.69(5)    yes
F301 . C69 . F302 . 105.71(5)    yes
C65 . C69 . F303 . 114.5(5)    yes
C65 . C69 . F304 . 112.1(4)    yes
F303 . C69 . F304 . 105.69(5)    yes
C65 . C69 . F305 . 112.5(5)    yes
F303 . C69 . F305 . 105.71(5)    yes
F304 . C69 . F305 . 105.67(5)    yes
C75 . C72 . F600 . 111.2(5)    yes
C75 . C72 . F601 . 115.6(6)    yes
F600 . C72 . F601 . 106.37(5)    yes
C75 . C72 . F602 . 110.4(6)    yes
F600 . C72 . F602 . 106.35(5)    yes
F601 . C72 . F602 . 106.36(5)    yes
C75 . C72 . F603 . 112.8(6)    yes
C75 . C72 . F604 . 111.0(6)    yes
F603 . C72 . F604 . 106.34(5)    yes
C75 . C72 . F605 . 113.5(7)    yes
F603 . C72 . F605 . 106.37(5)    yes
F604 . C72 . F605 . 106.35(5)    yes
B62 . C73 . C74 . 122.8(6)    yes
B62 . C73 . C78 . 122.1(6)    yes
C74 . C73 . C78 . 114.7(6)    yes
C73 . C74 . C75 . 122.5(7)    yes
C73 . C74 . H741 . 118.7    no
C75 . C74 . H741 . 118.8    no
C72 . C75 . C74 . 118.8(6)    yes
C72 . C75 . C76 . 120.1(6)    yes
C74 . C75 . C76 . 121.1(7)    yes
C75 . C76 . C77 . 118.0(6)    yes
C75 . C76 . H761 . 120.6    no
C77 . C76 . H761 . 121.4    no
C52 . C77 . C76 . 116.7(6)    yes
C52 . C77 . C78 . 122.3(6)    yes
C76 . C77 . C78 . 120.9(6)    yes
C73 . C78 . C77 . 122.8(6)    yes
C73 . C78 . H781 . 118.4    no
C77 . C78 . H781 . 118.8    no
B62 . C79 . C80 . 122.4(6)    yes
B62 . C79 . C84 . 121.0(6)    yes
C80 . C79 . C84 . 116.4(6)    yes
C79 . C80 . C81 . 120.8(7)    yes
C79 . C80 . H801 . 119.8    no
C81 . C80 . H801 . 119.4    no
C80 . C81 . C82 . 121.4(7)    yes
C80 . C81 . C85 . 118.2(7)    yes
C82 . C81 . C85 . 120.2(6)    yes
C81 . C82 . C83 . 118.4(7)    yes
C81 . C82 . H821 . 120.7    no
C83 . C82 . H821 . 120.9    no
C33 . C83 . C82 . 119.9(6)    yes
C33 . C83 . C84 . 119.9(7)    yes
C82 . C83 . C84 . 120.2(7)    yes
C79 . C84 . C83 . 122.7(7)    yes
C79 . C84 . H841 . 118.7    no
C83 . C84 . H841 . 118.6    no
C81 . C85 . F700 . 110.5(6)    yes
C81 . C85 . F701 . 114.3(5)    yes
F700 . C85 . F701 . 105.24(5)    yes
C81 . C85 . F702 . 115.4(6)    yes
F700 . C85 . F702 . 105.25(5)    yes
F701 . C85 . F702 . 105.26(5)    yes
C81 . C85 . F703 . 118.7(7)    yes
C81 . C85 . F704 . 108.4(6)    yes
F703 . C85 . F704 . 105.26(5)    yes
C81 . C85 . F705 . 113.0(7)    yes
F703 . C85 . F705 . 105.25(5)    yes
F704 . C85 . F705 . 105.24(5)    yes
Cl123 . C213 . Cl223 . 106.7(8)    yes
Cl123 . C213 . H2131 . 107.5    no
Cl223 . C213 . H2131 . 120.5    no
Cl123 . C213 . H2132 . 101.7    no
Cl223 . C213 . H2132 . 114.1    no
H2131 . C213 . H2132 . 104.6    no
C41 . H412 . Ir1 . 115.2    no


_iucr_refine_instruction_details_constraints
;
#
# Punched on 05/09/12 at 16:27:31
#
#LIST     12                                                                    
BLOCK SCALE X'S, U'S 
EQUIV PART(1001,OCC) PART(1002,OCC) 
WEIGHT -1 PART(1002,OCC) 
EQUIV PART(2001,OCC) PART(2002,OCC) 
WEIGHT -1 PART(2002,OCC) 
EQUIV PART(3001,OCC) PART(3002,OCC) 
WEIGHT -1 PART(3002,OCC) 
EQUIV PART(4001,OCC) PART(4002,OCC) 
WEIGHT -1 PART(4002,OCC) 
EQUIV PART(5001,OCC) PART(5002,OCC) 
WEIGHT -1 PART(5002,OCC) 
EQUIV PART(6001,OCC) PART(6002,OCC) 
WEIGHT -1 PART(6002,OCC) 
EQUIV PART(7001,OCC) PART(7002,OCC) 
WEIGHT -1 PART(7002,OCC) 
RIDE IR  (   1,X'S) H   (  11,X'S) 
RIDE C   (   2,X'S) H   (  21,X'S) H   (  22,X'S) 
RIDE C   (  10,X'S) H   ( 101,X'S) H   ( 102,X'S) H   ( 103,X'S) 
RIDE C   (  11,X'S) H   ( 111,X'S) 
RIDE C   (  13,X'S) H   ( 131,X'S) 
RIDE C   (  15,X'S) H   ( 151,X'S) H   ( 152,X'S) H   ( 153,X'S) 
RIDE C   (  16,X'S) H   ( 161,X'S) H   ( 162,X'S) H   ( 163,X'S) 
RIDE C   (  17,X'S) H   ( 171,X'S) H   ( 172,X'S) 
RIDE C   (  18,X'S) H   ( 181,X'S) H   ( 182,X'S) 
RIDE C   (  19,X'S) H   ( 191,X'S) H   ( 192,X'S) 
RIDE C   (  20,X'S) H   ( 201,X'S) H   ( 202,X'S) 
RIDE C   (  22,X'S) H   ( 221,X'S) 
RIDE C   (  24,X'S) H   ( 241,X'S) 
RIDE C   (  25,X'S) H   ( 251,X'S) H   ( 252,X'S) H   ( 253,X'S) 
RIDE C   (  26,X'S) H   ( 261,X'S) H   ( 262,X'S) H   ( 263,X'S) 
RIDE C   (  29,X'S) H   ( 291,X'S) H   ( 292,X'S) 
RIDE C   (  30,X'S) H   ( 301,X'S) H   ( 302,X'S) 
RIDE C   (  31,X'S) H   ( 311,X'S) H   ( 312,X'S) 
RIDE C   (  32,X'S) H   ( 321,X'S) H   ( 322,X'S) 
RIDE C   (  36,X'S) H   ( 361,X'S) H   ( 362,X'S) H   ( 363,X'S) 
RIDE C   (  37,X'S) H   ( 371,X'S) 
RIDE C   (  39,X'S) H   ( 391,X'S) 
RIDE C   (  41,X'S) H   ( 411,X'S) H   ( 412,X'S) H   ( 413,X'S) 
RIDE C   (  42,X'S) H   ( 421,X'S) H   ( 422,X'S) H   ( 423,X'S) 
RIDE C   (  45,X'S) H   ( 451,X'S) H   ( 452,X'S) H   ( 453,X'S) 
RIDE C   (  46,X'S) H   ( 461,X'S) 
RIDE C   (  48,X'S) H   ( 481,X'S) H   ( 482,X'S) H   ( 483,X'S) 
RIDE C   (  49,X'S) H   ( 491,X'S) 
RIDE C   (  51,X'S) H   ( 511,X'S) H   ( 512,X'S) H   ( 513,X'S) 
RIDE C   (  57,X'S) H   ( 571,X'S) 
RIDE C   (  59,X'S) H   ( 591,X'S) 
RIDE C   (  61,X'S) H   ( 611,X'S) 
RIDE C   (  64,X'S) H   ( 641,X'S) 
RIDE C   (  66,X'S) H   ( 661,X'S) 
RIDE C   (  68,X'S) H   ( 681,X'S) 
RIDE C   (  74,X'S) H   ( 741,X'S) 
RIDE C   (  76,X'S) H   ( 761,X'S) 
RIDE C   (  78,X'S) H   ( 781,X'S) 
RIDE C   (  80,X'S) H   ( 801,X'S) 
RIDE C   (  82,X'S) H   ( 821,X'S) 
RIDE C   (  84,X'S) H   ( 841,X'S) 
RIDE C   ( 213,X'S) H   (2131,X'S) H   (2132,X'S) 
END                                                                             
;


_iucr_refine_instruction_details_restraints
;
#
# Punched on 05/09/12 at 16:27:31
#
#LIST     16                                                                    
DIST 0,0.001 = MEAN 
CONT C(213) TO CL(223) C(213) TO CL(123) 
SIMU 0.01 CL(123) C(213) CL(223) AND 
CONT CL(123) C(213) CL(223) 
DELU 0.01 CL(123) C(213) CL(223) AND 
CONT CL(123) C(213) CL(223) 
SAME C(69) F(300) F(301) F(302) AND 
CONT C(69) F(301) F(302) F(300) AND 
CONT C(69) F(302) F(300) F(301) AND 
CONT C(69) F(303) F(304) F(305) AND 
CONT C(69) F(304) F(305) F(303) AND 
CONT C(69) F(305) F(303) F(304) 
SIMU 0.01 C(69) F(300) F(301) F(302) AND 
CONT C(69) F(301) F(302) F(300) AND 
CONT C(69) F(302) F(300) F(301) AND 
CONT C(69) F(303) F(304) F(305) AND 
CONT C(69) F(304) F(305) F(303) AND 
CONT C(69) F(305) F(303) F(304) 
DELU 0.01 C(69) F(300) F(301) F(302) AND 
CONT C(69) F(301) F(302) F(300) AND 
CONT C(69) F(302) F(300) F(301) AND 
CONT C(69) F(303) F(304) F(305) AND 
CONT C(69) F(304) F(305) F(303) AND 
CONT C(69) F(305) F(303) F(304) 
SAME C(52) F(400) F(401) F(402) AND 
CONT C(52) F(401) F(402) F(400) AND 
CONT C(52) F(402) F(400) F(401) AND 
CONT C(52) F(403) F(404) F(405) AND 
CONT C(52) F(404) F(405) F(403) AND 
CONT C(52) F(405) F(403) F(404) 
SIMU 0.01 C(52) F(400) F(401) F(402) AND 
CONT C(52) F(401) F(402) F(400) AND 
CONT C(52) F(402) F(400) F(401) AND 
CONT C(52) F(403) F(404) F(405) AND 
CONT C(52) F(404) F(405) F(403) AND 
CONT C(52) F(405) F(403) F(404) 
DELU 0.01 C(52) F(400) F(401) F(402) AND 
CONT C(52) F(401) F(402) F(400) AND 
CONT C(52) F(402) F(400) F(401) AND 
CONT C(52) F(403) F(404) F(405) AND 
CONT C(52) F(404) F(405) F(403) AND 
CONT C(52) F(405) F(403) F(404) 
SAME C(28) F(500) F(501) F(502) AND 
CONT C(28) F(501) F(502) F(500) AND 
CONT C(28) F(502) F(500) F(501) AND 
CONT C(28) F(503) F(504) F(505) AND 
CONT C(28) F(504) F(505) F(503) AND 
CONT C(28) F(505) F(503) F(504) 
SIMU 0.01 C(28) F(500) F(501) F(502) AND 
CONT C(28) F(501) F(502) F(500) AND 
CONT C(28) F(502) F(500) F(501) AND 
CONT C(28) F(503) F(504) F(505) AND 
CONT C(28) F(504) F(505) F(503) AND 
CONT C(28) F(505) F(503) F(504) 
DELU 0.01 C(28) F(500) F(501) F(502) AND 
CONT C(28) F(501) F(502) F(500) AND 
CONT C(28) F(502) F(500) F(501) AND 
CONT C(28) F(503) F(504) F(505) AND 
CONT C(28) F(504) F(505) F(503) AND 
CONT C(28) F(505) F(503) F(504) 
SAME C(72) F(600) F(601) F(602) AND 
CONT C(72) F(601) F(602) F(600) AND 
CONT C(72) F(602) F(600) F(601) AND 
CONT C(72) F(603) F(604) F(605) AND 
CONT C(72) F(604) F(605) F(603) AND 
CONT C(72) F(605) F(603) F(604) 
SIMU 0.01 C(72) F(600) F(601) F(602) AND 
CONT C(72) F(601) F(602) F(600) AND 
CONT C(72) F(602) F(600) F(601) AND 
CONT C(72) F(603) F(604) F(605) AND 
CONT C(72) F(604) F(605) F(603) AND 
CONT C(72) F(605) F(603) F(604) 
DELU 0.01 C(72) F(600) F(601) F(602) AND 
CONT C(72) F(601) F(602) F(600) AND 
CONT C(72) F(602) F(600) F(601) AND 
CONT C(72) F(603) F(604) F(605) AND 
CONT C(72) F(604) F(605) F(603) AND 
CONT C(72) F(605) F(603) F(604) 
SAME C(85) F(700) F(701) F(702) AND 
CONT C(85) F(701) F(702) F(700) AND 
CONT C(85) F(702) F(700) F(701) AND 
CONT C(85) F(703) F(704) F(705) AND 
CONT C(85) F(704) F(705) F(703) AND 
CONT C(85) F(705) F(703) F(704) 
SIMU 0.01 C(85) F(700) F(701) F(702) AND 
CONT C(85) F(701) F(702) F(700) AND 
CONT C(85) F(702) F(700) F(701) AND 
CONT C(85) F(703) F(704) F(705) AND 
CONT C(85) F(704) F(705) F(703) AND 
CONT C(85) F(705) F(703) F(704) 
DELU 0.01 C(85) F(700) F(701) F(702) AND 
CONT C(85) F(701) F(702) F(700) AND 
CONT C(85) F(702) F(700) F(701) AND 
CONT C(85) F(703) F(704) F(705) AND 
CONT C(85) F(704) F(705) F(703) AND 
CONT C(85) F(705) F(703) F(704) 
SAME C(33) F(800) F(801) F(802) AND 
CONT C(33) F(801) F(802) F(800) AND 
CONT C(33) F(802) F(800) F(801) AND 
CONT C(33) F(803) F(804) F(805) AND 
CONT C(33) F(804) F(805) F(803) AND 
CONT C(33) F(805) F(803) F(804) 
SIMU 0.01 C(33) F(800) F(801) F(802) AND 
CONT C(33) F(801) F(802) F(800) AND 
CONT C(33) F(802) F(800) F(801) AND 
CONT C(33) F(803) F(804) F(805) AND 
CONT C(33) F(804) F(805) F(803) AND 
CONT C(33) F(805) F(803) F(804) 
DELU 0.01 C(33) F(800) F(801) F(802) AND 
CONT C(33) F(801) F(802) F(800) AND 
CONT C(33) F(802) F(800) F(801) AND 
CONT C(33) F(803) F(804) F(805) AND 
CONT C(33) F(804) F(805) F(803) AND 
CONT C(33) F(805) F(803) F(804) 
SAME C(55) F(900) F(901) F(902) AND 
CONT C(55) F(901) F(902) F(900) AND 
CONT C(55) F(902) F(900) F(901) AND 
CONT C(55) F(903) F(904) F(905) AND 
CONT C(55) F(904) F(905) F(903) AND 
CONT C(55) F(905) F(903) F(904) 
SIMU 0.01 C(55) F(900) F(901) F(902) AND 
CONT C(55) F(901) F(902) F(900) AND 
CONT C(55) F(902) F(900) F(901) AND 
CONT C(55) F(903) F(904) F(905) AND 
CONT C(55) F(904) F(905) F(903) AND 
CONT C(55) F(905) F(903) F(904) 
DELU 0.01 C(55) F(900) F(901) F(902) AND 
CONT C(55) F(901) F(902) F(900) AND 
CONT C(55) F(902) F(900) F(901) AND 
CONT C(55) F(903) F(904) F(905) AND 
CONT C(55) F(904) F(905) F(903) AND 
CONT C(55) F(905) F(903) F(904) 
REM   HREST   START (DO NOT REMOVE THIS LINE) 
REM   HREST   END (DO NOT REMOVE THIS LINE) 
REM   SHIFTLIMIT   START (DO NOT REMOVE THIS LINE) 
LIMIT      0.01000000 U[ISO] 
LIMIT      0.01000000 X 
LIMIT      0.01000000 Y 
LIMIT      0.01000000 Z 
LIMIT      0.01000000 U[11] 
LIMIT      0.01000000 U[22] 
LIMIT      0.01000000 U[33] 
LIMIT      0.01000000 U[12] 
LIMIT      0.01000000 U[13] 
LIMIT      0.01000000 U[23] 
LIMIT      0.01000000 OCC 
REM   SHIFTLIMIT   END (DO NOT REMOVE THIS LINE) 
END                                                                             
;
#==============================================================================
data_3a
#==============================================================================
_audit_creation_date        "12-08-22"
_audit_creation_method CRYSTALS_ver_14.23

_oxford_structure_analysis_title  '022np11'
_chemical_name_systematic         .
_chemical_melting_point           .

_cell_length_a                    13.83290(10)
_cell_length_b                    16.2697(2)
_cell_length_c                    17.7359(2)
_cell_angle_alpha                 91.7424(4)
_cell_angle_beta                  110.8926(4)
_cell_angle_gamma                 90.7674(7)
_cell_volume                      3726.17(7)
 
_symmetry_cell_setting            'Triclinic' 
_symmetry_space_group_name_H-M    'P -1 ' 
_symmetry_space_group_name_Hall   '-P 1'
loop_
 _symmetry_equiv_pos_as_xyz
 'x,y,z'
 '-x,-y,-z'

loop_
_atom_type_symbol
_atom_type_scat_dispersion_real
_atom_type_scat_dispersion_imag
_atom_type_scat_Cromer_Mann_a1
_atom_type_scat_Cromer_Mann_b1
_atom_type_scat_Cromer_Mann_a2
_atom_type_scat_Cromer_Mann_b2
_atom_type_scat_Cromer_Mann_a3
_atom_type_scat_Cromer_Mann_b3
_atom_type_scat_Cromer_Mann_a4
_atom_type_scat_Cromer_Mann_b4
_atom_type_scat_Cromer_Mann_c
_atom_type_scat_source  
 C       0.0033   0.0016   2.3100  20.8439   1.0200  10.2075   1.5886   0.5687
   0.8650  51.6512   0.2156 'International Tables Vol C 4.2.6.8 and 6.1.1.4'
 H       0.0000   0.0000   0.4930  10.5109   0.3229  26.1257   0.1402   3.1424
   0.0408  57.7998   0.0030 'International Tables Vol C 4.2.6.8 and 6.1.1.4'
 N       0.0061   0.0033  12.2126   0.0057   3.1322   9.8933   2.0125  28.9975
   1.1663   0.5826 -11.5290 'International Tables Vol C 4.2.6.8 and 6.1.1.4'
 Ir     -1.4442   7.9887  27.3049   1.5928  16.7296   8.8655  15.6115   0.4179
   5.8338  45.0011  11.4722 'International Tables Vol C 4.2.6.8 and 6.1.1.4'
 B       0.0013   0.0007   2.0545  23.2185   1.3326   1.0210   1.0979  60.3498
   0.7068   0.1403  -0.1932 'International Tables Vol C 4.2.6.8 and 6.1.1.4'
 F       0.0171   0.0103   3.5392  10.2825   2.6412   4.2944   1.5170   0.2615
   1.0243  26.1476   0.2776 'International Tables Vol C 4.2.6.8 and 6.1.1.4'
 
 
_cell_formula_units_Z                    2

# Given Formula = C76 H70 B1 F24 Ir1 N4 
# Dc =      1.51 Fooo =   1704.00 Mu =     18.97 M =   1698.40
# Found Formula = C76 H70 B1 F24.00 Ir1 N4 
# Dc =      1.51 FOOO =   1704.00 Mu =     18.97 M =   1698.40

_chemical_formula_sum             'C76 H70 B1 F24 Ir1 N4'
_chemical_formula_moiety          'C32 H12 B F24, C44 H58 Ir N4'
_chemical_compound_source                .
_chemical_formula_weight           1698.40
 
 
_cell_measurement_reflns_used        14915
_cell_measurement_theta_min              5
_cell_measurement_theta_max             27
_cell_measurement_temperature          150
 
_exptl_crystal_description        'block' 
_exptl_crystal_colour             'yellow' 
_exptl_crystal_size_min           0.060 
_exptl_crystal_size_mid           0.100 
_exptl_crystal_size_max           0.100 
 
_exptl_crystal_density_diffrn     1.514 
_exptl_crystal_density_meas       .
_exptl_crystal_density_method     'not measured' 
# Non-dispersive F(000): 
_exptl_crystal_F_000              1704 
_exptl_absorpt_coefficient_mu     1.897 
 
# Sheldrick geometric approximatio 0.83 0.89 
_exptl_absorpt_correction_type    multi-scan 
_exptl_absorpt_process_details    'DENZO/SCALEPACK (Otwinowski & Minor, 1997)' 
_exptl_absorpt_correction_T_min   0.78 
_exptl_absorpt_correction_T_max   0.89 
# For a Kappa CCD, set Tmin to 1.0 and 
# Tmax to the ratio of max:min frame scales in scale_all.log 
_diffrn_measurement_device_type   'Nonius KappaCCD' 
_diffrn_measurement_device        'Area' 
_diffrn_radiation_monochromator   'graphite' 
_diffrn_radiation_type            'Mo K\a'
_diffrn_radiation_wavelength           0.71073
_diffrn_measurement_method        \w 
 
# If a reference occurs more than once, delete the author 
# and date from subsequent references. 
_computing_data_collection        'COLLECT (Nonius, 2001).' 
_computing_cell_refinement        'DENZO/SCALEPACK (Otwinowski & Minor, 1997)' 
_computing_data_reduction         'DENZO/SCALEPACK (Otwinowski & Minor, 1997)' 
_computing_structure_solution     'SIR92 (Altomare et al., 1994)' 
_computing_structure_refinement   'CRYSTALS (Betteridge et al., 2003)' 
_computing_publication_material   'CRYSTALS (Betteridge et al., 2003)' 
_computing_molecular_graphics     'CAMERON (Watkin et al., 1996)' 
 
_diffrn_standards_interval_time   . 
_diffrn_standards_interval_count  . 
_diffrn_standards_number          0 
_diffrn_standards_decay_%         . 
 
_diffrn_ambient_temperature        150
_diffrn_reflns_number             51811 
_reflns_number_total              16839 
_diffrn_reflns_av_R_equivalents   0.024 
# Number of reflections without Friedels Law is 26734 
# Number of reflections with Friedels Law is 16839 
# Theoretical number of reflections is about 17115 
 
 
_diffrn_reflns_theta_min          5.120 
_diffrn_reflns_theta_max          27.497 
_diffrn_measured_fraction_theta_max 0.985 
 
_diffrn_reflns_theta_full         25.022 
_diffrn_measured_fraction_theta_full 0.989 
 
 
_diffrn_reflns_limit_h_min        -17 
_diffrn_reflns_limit_h_max        17 
_diffrn_reflns_limit_k_min        -21 
_diffrn_reflns_limit_k_max        20 
_diffrn_reflns_limit_l_min        -22 
_diffrn_reflns_limit_l_max        23 
_reflns_limit_h_min               -17 
_reflns_limit_h_max               16 
_reflns_limit_k_min               -21 
_reflns_limit_k_max               21 
_reflns_limit_l_min               0 
_reflns_limit_l_max               23 
 
_oxford_diffrn_Wilson_B_factor    2.33 
_oxford_diffrn_Wilson_scale       21.43 
 
_atom_sites_solution_primary      Direct #heavy,direct,difmap,geom
# _atom_sites_solution_secondary  difmap
_atom_sites_solution_hydrogens    difmap
 
_refine_diff_density_min          -1.29 
_refine_diff_density_max          1.63 
 
 
# The current dictionary definitions do not cover the 
# situation where the reflections used for refinement were 
# selected by a user-defined sigma threshold 
 
 
# The values actually used during refinement 
_oxford_reflns_threshold_expression_ref     I>-3.0\s(I)
_refine_ls_number_reflns          16839 
_refine_ls_number_restraints      486 
_refine_ls_number_parameters      1039 
_oxford_refine_ls_R_factor_ref    0.0533 
_refine_ls_wR_factor_ref          0.1077 
_refine_ls_goodness_of_fit_ref    0.8450 
_refine_ls_shift/su_max           0.0045178 
_refine_ls_shift/su_mean          0.0000622 
 
 
# The values computed from all data 
_oxford_reflns_number_all         16839 
_refine_ls_R_factor_all           0.0533 
_refine_ls_wR_factor_all          0.1077 
 
# The values computed with a 2 sigma cutoff - a la SHELX 
_reflns_threshold_expression      I>2.0\s(I)
_reflns_number_gt                 14550 
_refine_ls_R_factor_gt            0.0426 
_refine_ls_wR_factor_gt           0.0980 
 
# choose from: rm (reference molecule of known chirality), 
# ad (anomolous dispersion - Flack), rmad (rm and ad), 
# syn (from synthesis), unk (unknown) or . (not applicable). 
_chemical_absolute_configuration  '.' 
 
 
_refine_ls_structure_factor_coef  Fsqd 
_refine_ls_matrix_type            full
_refine_ls_hydrogen_treatment     constr         # none, undef, noref, refall,
                                                 # refxyz, refU, constr or mixed
_refine_ls_weighting_scheme       calc 
_refine_ls_weighting_details 
;
 Method, part 1, Chebychev polynomial, (Watkin, 1994, Prince, 1982) 
 [weight] = 1.0/[A~0~*T~0~(x)+A~1~*T~1~(x) ... +A~n-1~]*T~n-1~(x)] 
 where A~i~ are the Chebychev coefficients listed below and x= Fcalc/Fmax 
 Method = Robust Weighting (Prince, 1982) 
 W = [weight] * [1-(deltaF/6*sigmaF)^2^]^2^ 
 A~i~ are: 
 23.4 33.2 16.5 4.36 
;
# Insert your own references if required - in alphabetical order 
_publ_section_references 
; 
Nonius (2001). COLLECT. Nonius BV, Delft, The Netherlands. 
 
Otwinowski, Z. & Minor, W. (1997). Methods in Enzymology, Vol. 276, 
edited by C. W. Carter Jr & R. M. Sweet, pp. 307--326. 
New York: Academic Press. 
 
Betteridge, P.W., Carruthers, J.R., Cooper, R.I., 
Prout, K. & Watkin, D.J. (2003). J. Appl. Cryst. 36, 1487. 
 
Watkin, D.J., Prout, C.K. & Pearce, L.J. (1996). CAMERON, Chemical 
Crystallography Laboratory, Oxford, UK. 
 
Altomare, A., Cascarano, G., Giacovazzo, C., Guagliardi, A., Burla, M.C., 
Polidori, G. & Camalli, M. (1994). J. Appl. Cryst. 27, 435. 
 
Watkin D.J. (1994). 
Acta Cryst, A50, 411-437. 
 
Prince, E. 
Mathematical Techniques in Crystallography 
and Materials Science 
Springer-Verlag, New York, 1982. 
; 

# Uequiv = arithmetic mean of Ui i.e. Ueqiv = (U1+U2+U3)/3

# Replace last . with number of unfound hydrogen atoms attached to an atom.

# ..._refinement_flags_... 
# . no refinement constraints           S special position constraint on site
# G rigid group refinement of site      R riding atom
# D distance or angle restraint on site T thermal displacement constraints
# U Uiso or Uij restraint (rigid bond)  P partial occupancy constraint


loop_
_atom_site_label
_atom_site_type_symbol
_atom_site_fract_x
_atom_site_fract_y
_atom_site_fract_z
_atom_site_U_iso_or_equiv
_atom_site_occupancy
_atom_site_adp_type
_atom_site_refinement_flags_posn
_atom_site_refinement_flags_adp
_atom_site_refinement_flags_occupancy
_atom_site_disorder_assembly
_atom_site_disorder_group
_atom_site_attached_hydrogens
Ir1 Ir 0.474758(13) 0.730000(10) 0.755849(10) 0.0288 1.0000 Uani . . . . . . 
C2 C 0.4403(4) 0.7397(3) 0.8587(3) 0.0354 1.0000 Uani . . . . . . 
N3 N 0.3824(3) 0.7955(3) 0.8782(2) 0.0416 1.0000 Uani . . . . . . 
C4 C 0.3238(4) 0.8526(3) 0.8198(3) 0.0389 1.0000 Uani . . . . . . 
C5 C 0.3688(4) 0.9291(3) 0.8152(3) 0.0424 1.0000 Uani . . . . . . 
C6 C 0.3085(5) 0.9831(3) 0.7588(3) 0.0498 1.0000 Uani . . . . . . 
C7 C 0.2067(5) 0.9644(3) 0.7112(3) 0.0512 1.0000 Uani . . . . . . 
C8 C 0.1644(4) 0.8893(3) 0.7192(3) 0.0511 1.0000 Uani . . . . . . 
C9 C 0.2216(4) 0.8324(3) 0.7727(3) 0.0446 1.0000 Uani . . . . . . 
C10 C 0.1733(5) 0.7509(4) 0.7809(5) 0.0649 1.0000 Uani . . . . . . 
C11 C 0.1421(6) 1.0263(4) 0.6529(4) 0.0736 1.0000 Uani . . . . . . 
H11 H 0.4137 0.8030 0.7243 0.0435 1.0000 Uiso R . . . . . 
C12 C 0.4785(5) 0.9521(4) 0.8671(4) 0.0593 1.0000 Uani . . . . . . 
H12 H 0.5399 0.7988 0.7966 0.0435 1.0000 Uiso R . . . . . 
C13 C 0.3730(5) 0.8035(4) 0.9584(3) 0.0593 1.0000 Uani . . . . . . 
C14 C 0.3952(6) 0.7235(5) 1.0010(4) 0.0725 1.0000 Uani . . . . . . 
C15 C 0.4941(5) 0.6891(4) 0.9994(3) 0.0591 1.0000 Uani . . . . . . 
N16 N 0.4927(3) 0.6877(3) 0.9162(2) 0.0422 1.0000 Uani . . . . . . 
C17 C 0.5532(4) 0.6275(3) 0.8928(3) 0.0400 1.0000 Uani . . . . . . 
C18 C 0.5091(4) 0.5482(3) 0.8686(3) 0.0432 1.0000 Uani . . . . . . 
C19 C 0.5696(4) 0.4879(3) 0.8525(3) 0.0475 1.0000 Uani . . . . . . 
C20 C 0.6715(4) 0.5048(3) 0.8582(3) 0.0456 1.0000 Uani . . . . . . 
C21 C 0.7117(4) 0.5834(3) 0.8813(3) 0.0478 1.0000 Uani . . . . . . 
C22 C 0.6553(4) 0.6461(3) 0.9004(3) 0.0448 1.0000 Uani . . . . . . 
C23 C 0.7093(4) 0.7272(3) 0.9355(4) 0.0546 1.0000 Uani . . . . . . 
C24 C 0.7356(5) 0.4380(4) 0.8405(4) 0.0620 1.0000 Uani . . . . . . 
C25 C 0.4001(5) 0.5291(4) 0.8638(4) 0.0621 1.0000 Uani . . . . . . 
C26 C 0.5121(3) 0.7287(2) 0.6547(3) 0.0312 1.0000 Uani . . . . . . 
N27 N 0.5803(3) 0.7767(2) 0.6365(2) 0.0336 1.0000 Uani . . . . . . 
C28 C 0.6413(4) 0.8398(3) 0.6929(3) 0.0369 1.0000 Uani . . . . . . 
C29 C 0.5996(4) 0.9171(3) 0.6953(3) 0.0404 1.0000 Uani . . . . . . 
C30 C 0.4908(4) 0.9351(3) 0.6445(4) 0.0512 1.0000 Uani . . . . . . 
C31 C 0.6642(5) 0.9782(3) 0.7465(3) 0.0501 1.0000 Uani . . . . . . 
C32 C 0.7676(5) 0.9653(3) 0.7906(3) 0.0518 1.0000 Uani . . . . . . 
C33 C 0.8068(4) 0.8875(3) 0.7857(3) 0.0491 1.0000 Uani . . . . . . 
C34 C 0.7444(4) 0.8239(3) 0.7377(3) 0.0398 1.0000 Uani . . . . . . 
C35 C 0.7887(4) 0.7401(4) 0.7346(4) 0.0535 1.0000 Uani . . . . . . 
C36 C 0.8370(6) 1.0351(4) 0.8401(4) 0.0722 1.0000 Uani . . . . . . 
C37 C 0.5935(4) 0.7732(3) 0.5580(3) 0.0395 1.0000 Uani . . . . . . 
C38 C 0.5642(4) 0.6883(3) 0.5182(3) 0.0391 1.0000 Uani . . . . . . 
C39 C 0.4561(4) 0.6642(3) 0.5146(3) 0.0366 1.0000 Uani . . . . . . 
N40 N 0.4537(3) 0.6754(2) 0.5964(2) 0.0313 1.0000 Uani . . . . . . 
C41 C 0.3782(3) 0.6285(3) 0.6171(3) 0.0329 1.0000 Uani . . . . . . 
C42 C 0.4011(3) 0.5475(3) 0.6414(3) 0.0361 1.0000 Uani . . . . . . 
C43 C 0.5038(4) 0.5113(3) 0.6492(4) 0.0498 1.0000 Uani . . . . . . 
C44 C 0.3245(4) 0.5007(3) 0.6548(3) 0.0465 1.0000 Uani . . . . . . 
C45 C 0.2275(4) 0.5315(3) 0.6450(4) 0.0498 1.0000 Uani . . . . . . 
C46 C 0.2082(4) 0.6115(3) 0.6211(4) 0.0478 1.0000 Uani . . . . . . 
C47 C 0.2813(4) 0.6615(3) 0.6052(3) 0.0386 1.0000 Uani . . . . . . 
C48 C 0.2505(4) 0.7443(3) 0.5686(3) 0.0468 1.0000 Uani . . . . . . 
C49 C 0.1454(5) 0.4789(4) 0.6584(5) 0.0762 1.0000 Uani . . . . . . 
C52 C -0.2256(3) 0.0148(2) 0.5571(3) 0.0676 1.0000 Uani D . . . . . 
C57 C -0.2203(4) 0.0882(3) 0.6087(3) 0.0361 1.0000 Uani . . . . . . 
C58 C -0.1266(3) 0.1314(2) 0.6451(3) 0.0317 1.0000 Uani . . . . . . 
C59 C -0.1177(3) 0.2035(2) 0.6924(2) 0.0282 1.0000 Uani . . . . . . 
C60 C -0.2096(3) 0.2286(2) 0.7014(2) 0.0290 1.0000 Uani . . . . . . 
H61 H 0.3377 1.0337 0.7531 0.0600 1.0000 Uiso R . . . . . 
C61 C -0.3028(3) 0.1851(3) 0.6665(3) 0.0301 1.0000 Uani . . . . . . 
C62 C -0.3094(3) 0.1147(3) 0.6192(3) 0.0344 1.0000 Uani . . . . . . 
C63 C -0.3936(3) 0.2143(3) 0.6856(3) 0.0340 1.0000 Uani . . . . . . 
F64 F -0.4078(2) 0.29553(17) 0.67364(18) 0.0434 1.0000 Uani . . . . . . 
F65 F -0.3815(2) 0.2043(2) 0.76299(17) 0.0486 1.0000 Uani . . . . . . 
F66 F -0.4827(2) 0.17618(19) 0.64051(19) 0.0484 1.0000 Uani . . . . . . 
B67 B -0.0077(3) 0.2517(3) 0.7426(3) 0.0271 1.0000 Uani . . . . . . 
C68 C 0.0767(3) 0.2466(2) 0.6978(2) 0.0269 1.0000 Uani . . . . . . 
C69 C 0.1821(3) 0.2580(3) 0.7419(2) 0.0291 1.0000 Uani . . . . . . 
C70 C 0.2558(3) 0.2594(3) 0.7052(3) 0.0329 1.0000 Uani . . . . . . 
C71 C 0.3675(3) 0.2684(3) 0.7567(3) 0.0406 1.0000 Uani . . . . . . 
F72 F 0.4251(2) 0.3017(2) 0.7182(2) 0.0500 1.0000 Uani . . . . . . 
F73 F 0.3834(2) 0.3184(3) 0.8217(2) 0.0652 1.0000 Uani . . . . . . 
F74 F 0.4100(2) 0.1971(2) 0.7834(3) 0.0786 1.0000 Uani . . . . . . 
C75 C 0.2270(3) 0.2498(3) 0.6218(3) 0.0344 1.0000 Uani . . . . . . 
C76 C 0.1220(3) 0.2411(3) 0.5768(3) 0.0325 1.0000 Uani . . . . . . 
C77 C 0.0492(3) 0.2399(2) 0.6138(3) 0.0294 1.0000 Uani . . . . . . 
C78 C 0.0864(4) 0.2321(3) 0.4868(3) 0.0451 1.0000 Uani . . . . . . 
F79 F 0.1619(3) 0.2251(3) 0.45793(19) 0.0687 1.0000 Uani . . . . . . 
F80 F 0.0246(4) 0.1658(3) 0.4586(2) 0.0861 1.0000 Uani . . . . . . 
H81 H 0.0956 0.8763 0.6878 0.0612 1.0000 Uiso R . . . . . 
F81 F 0.0296(3) 0.2946(3) 0.4507(2) 0.0811 1.0000 Uani . . . . . . 
C82 C 0.0320(3) 0.2088(2) 0.8309(3) 0.0283 1.0000 Uani . . . . . . 
C83 C 0.1074(3) 0.1481(2) 0.8534(3) 0.0300 1.0000 Uani . . . . . . 
C84 C 0.1351(3) 0.1104(2) 0.9275(3) 0.0313 1.0000 Uani . . . . . . 
C85 C 0.0867(3) 0.1297(3) 0.9813(3) 0.0334 1.0000 Uani . . . . . . 
C86 C 0.0098(3) 0.1877(3) 0.9598(3) 0.0333 1.0000 Uani . . . . . . 
C87 C -0.0151(3) 0.2271(3) 0.8867(3) 0.0313 1.0000 Uani . . . . . . 
C88 C -0.0440(4) 0.2095(4) 1.0172(3) 0.0489 1.0000 Uani . . . . . . 
F89 F -0.1319(3) 0.2476(3) 0.9836(2) 0.0738 1.0000 Uani . . . . . . 
F90 F -0.0640(4) 0.1430(3) 1.0527(3) 0.0924 1.0000 Uani . . . . . . 
F91 F 0.0143(3) 0.2580(3) 1.0785(2) 0.0832 1.0000 Uani . . . . . . 
C92 C 0.2208(4) 0.0499(3) 0.9481(3) 0.0436 1.0000 Uani . . . . . . 
F93 F 0.3046(3) 0.0789(2) 0.9354(2) 0.0651 1.0000 Uani . . . . . . 
F94 F 0.1933(3) -0.0193(2) 0.9031(3) 0.0687 1.0000 Uani . . . . . . 
F95 F 0.2531(3) 0.0290(3) 1.0249(2) 0.0825 1.0000 Uani . . . . . . 
C96 C -0.0249(3) 0.3505(2) 0.7517(3) 0.0303 1.0000 Uani . . . . . . 
C97 C -0.0930(3) 0.3925(3) 0.6880(3) 0.0332 1.0000 Uani . . . . . . 
C98 C -0.1039(4) 0.4772(3) 0.6919(3) 0.0401 1.0000 Uani . . . . . . 
C99 C -0.0458(4) 0.5238(3) 0.7597(4) 0.0460 1.0000 Uani . . . . . . 
C100 C 0.0240(4) 0.4835(3) 0.8236(3) 0.0439 1.0000 Uani . . . . . . 
H101 H 0.2137 0.7064 0.7721 0.0969 1.0000 Uiso R . . . . . 
C101 C 0.0339(4) 0.3983(3) 0.8196(3) 0.0362 1.0000 Uani . . . . . . 
H102 H 0.1040 0.7457 0.7417 0.0970 1.0000 Uiso R . . . . . 
C102 C 0.0883(4) 0.5309(2) 0.8968(2) 0.0782 1.0000 Uani D . . . . . 
H103 H 0.1709 0.7476 0.8345 0.0971 1.0000 Uiso R . . . . . 
C109 C -0.1808(3) 0.5173(2) 0.6231(2) 0.0688 1.0000 Uani D . . . . . 
H111 H 0.1065 1.0602 0.6791 0.1099 1.0000 Uiso R . . . . . 
H112 H 0.1867 1.0600 0.6356 0.1101 1.0000 Uiso R . . . . . 
H113 H 0.0927 0.9981 0.6069 0.1101 1.0000 Uiso R . . . . . 
H121 H 0.4968 1.0057 0.8554 0.0889 1.0000 Uiso R . . . . . 
H122 H 0.5254 0.9134 0.8578 0.0892 1.0000 Uiso R . . . . . 
H123 H 0.4867 0.9521 0.9231 0.0891 1.0000 Uiso R . . . . . 
H131 H 0.4227 0.8444 0.9913 0.0709 1.0000 Uiso R . . . . . 
H132 H 0.3035 0.8199 0.9517 0.0713 1.0000 Uiso R . . . . . 
H141 H 0.4012 0.7329 1.0571 0.0872 1.0000 Uiso R . . . . . 
H142 H 0.3384 0.6841 0.9735 0.0871 1.0000 Uiso R . . . . . 
H151 H 0.5524 0.7227 1.0345 0.0711 1.0000 Uiso R . . . . . 
H152 H 0.5006 0.6337 1.0181 0.0711 1.0000 Uiso R . . . . . 
H191 H 0.5417 0.4346 0.8371 0.0568 1.0000 Uiso R . . . . . 
H211 H 0.7789 0.5955 0.8846 0.0569 1.0000 Uiso R . . . . . 
H231 H 0.7425 0.7498 0.9009 0.0822 1.0000 Uiso R . . . . . 
H232 H 0.6587 0.7653 0.9404 0.0820 1.0000 Uiso R . . . . . 
H233 H 0.7603 0.7199 0.9883 0.0820 1.0000 Uiso R . . . . . 
H241 H 0.8075 0.4557 0.8598 0.0932 1.0000 Uiso R . . . . . 
H242 H 0.7291 0.3887 0.8669 0.0932 1.0000 Uiso R . . . . . 
H243 H 0.7132 0.4268 0.7833 0.0932 1.0000 Uiso R . . . . . 
H251 H 0.3805 0.4738 0.8415 0.0928 1.0000 Uiso R . . . . . 
H252 H 0.3525 0.5673 0.8297 0.0928 1.0000 Uiso R . . . . . 
H253 H 0.3967 0.5331 0.9172 0.0929 1.0000 Uiso R . . . . . 
F300 F -0.3189(5) -0.0189(5) 0.5187(6) 0.0717 0.406(9) Uani D . P 3 1 . 
F301 F -0.1740(8) -0.0436(5) 0.6089(5) 0.0791 0.406(9) Uani D . P 3 1 . 
H301 H 0.4441 0.9053 0.6630 0.0771 1.0000 Uiso R . . . . . 
F302 F -0.1823(8) 0.0155(5) 0.5027(6) 0.0794 0.406(9) Uani D . P 3 1 . 
H302 H 0.4774 0.9928 0.6480 0.0769 1.0000 Uiso R . . . . . 
F303 F -0.2992(5) -0.0402(4) 0.5519(4) 0.0738 0.594(9) Uani D . P 3 2 . 
H303 H 0.4765 0.9194 0.5887 0.0776 1.0000 Uiso R . . . . . 
F304 F -0.1408(4) -0.0284(4) 0.5740(5) 0.0944 0.594(9) Uani D . P 3 2 . 
F305 F -0.2467(7) 0.0371(4) 0.4795(4) 0.0788 0.594(9) Uani D . P 3 2 . 
H311 H 0.6365 1.0295 0.7504 0.0597 1.0000 Uiso R . . . . . 
H331 H 0.8762 0.8779 0.8153 0.0589 1.0000 Uiso R . . . . . 
H351 H 0.7887 0.7284 0.6808 0.0801 1.0000 Uiso R . . . . . 
H352 H 0.8583 0.7391 0.7733 0.0801 1.0000 Uiso R . . . . . 
H353 H 0.7469 0.6995 0.7480 0.0801 1.0000 Uiso R . . . . . 
H361 H 0.8534 1.0724 0.8051 0.1081 1.0000 Uiso R . . . . . 
H362 H 0.8999 1.0140 0.8773 0.1081 1.0000 Uiso R . . . . . 
H363 H 0.8013 1.0645 0.8698 0.1080 1.0000 Uiso R . . . . . 
H371 H 0.5494 0.8135 0.5231 0.0468 1.0000 Uiso R . . . . . 
H372 H 0.6656 0.7866 0.5660 0.0472 1.0000 Uiso R . . . . . 
H381 H 0.6137 0.6497 0.5496 0.0470 1.0000 Uiso R . . . . . 
H382 H 0.5650 0.6895 0.4641 0.0467 1.0000 Uiso R . . . . . 
H391 H 0.4057 0.6993 0.4780 0.0441 1.0000 Uiso R . . . . . 
H392 H 0.4398 0.6067 0.4957 0.0439 1.0000 Uiso R . . . . . 
F400 F 0.0633(9) 0.5319(7) 0.9620(5) 0.0914 0.476(13) Uani D . P 2 1 . 
F401 F 0.0986(9) 0.6102(4) 0.8831(6) 0.0798 0.476(13) Uani D . P 2 1 . 
F402 F 0.1869(6) 0.5030(6) 0.9225(7) 0.0900 0.476(13) Uani D . P 2 1 . 
F403 F 0.0240(7) 0.5648(7) 0.9317(6) 0.0909 0.524(13) Uani D . P 2 2 . 
F404 F 0.1422(8) 0.5945(5) 0.8859(5) 0.0790 0.524(13) Uani D . P 2 2 . 
F405 F 0.1562(8) 0.4905(4) 0.9557(5) 0.1060 0.524(13) Uani D . P 2 2 . 
H431 H 0.5093 0.4570 0.6701 0.0749 1.0000 Uiso R . . . . . 
H432 H 0.5105 0.5073 0.5970 0.0748 1.0000 Uiso R . . . . . 
H433 H 0.5596 0.5454 0.6850 0.0749 1.0000 Uiso R . . . . . 
H441 H 0.3386 0.4467 0.6709 0.0560 1.0000 Uiso R . . . . . 
H461 H 0.1436 0.6321 0.6145 0.0570 1.0000 Uiso R . . . . . 
H481 H 0.2084 0.7718 0.5937 0.0704 1.0000 Uiso R . . . . . 
H482 H 0.2112 0.7364 0.5119 0.0701 1.0000 Uiso R . . . . . 
H483 H 0.3113 0.7776 0.5758 0.0703 1.0000 Uiso R . . . . . 
H491 H 0.0890 0.5118 0.6600 0.1142 1.0000 Uiso R . . . . . 
H492 H 0.1200 0.4379 0.6155 0.1143 1.0000 Uiso R . . . . . 
H493 H 0.1743 0.4515 0.7084 0.1143 1.0000 Uiso R . . . . . 
F500 F -0.2633(5) 0.5372(5) 0.6428(5) 0.0868 0.570(8) Uani D . P 1 1 . 
F501 F -0.2196(7) 0.4742(4) 0.5542(4) 0.0932 0.570(8) Uani D . P 1 1 . 
F502 F -0.1479(5) 0.5869(4) 0.6043(5) 0.0771 0.570(8) Uani D . P 1 1 . 
F503 F -0.2782(5) 0.4909(6) 0.6012(7) 0.0885 0.430(8) Uani D . P 1 2 . 
F504 F -0.1541(9) 0.5008(6) 0.5583(5) 0.0875 0.430(8) Uani D . P 1 2 . 
F505 F -0.1847(8) 0.5977(3) 0.6276(5) 0.0770 0.430(8) Uani D . P 1 2 . 
H581 H -0.0684 0.1113 0.6369 0.0380 1.0000 Uiso R . . . . . 
H601 H -0.2086 0.2765 0.7321 0.0351 1.0000 Uiso R . . . . . 
H621 H -0.3723 0.0856 0.5949 0.0410 1.0000 Uiso R . . . . . 
H691 H 0.2047 0.2646 0.7979 0.0348 1.0000 Uiso R . . . . . 
H751 H 0.2760 0.2486 0.5969 0.0408 1.0000 Uiso R . . . . . 
H771 H -0.0208 0.2326 0.5816 0.0351 1.0000 Uiso R . . . . . 
H831 H 0.1402 0.1324 0.8180 0.0361 1.0000 Uiso R . . . . . 
H851 H 0.1053 0.1047 1.0310 0.0401 1.0000 Uiso R . . . . . 
H871 H -0.0654 0.2672 0.8744 0.0383 1.0000 Uiso R . . . . . 
H971 H -0.1333 0.3632 0.6411 0.0403 1.0000 Uiso R . . . . . 
H991 H -0.0531 0.5807 0.7623 0.0550 1.0000 Uiso R . . . . . 
H1011 H 0.0815 0.3734 0.8639 0.0430 1.0000 Uiso R . . . . . 
loop_
_atom_site_aniso_label
_atom_site_aniso_U_11
_atom_site_aniso_U_22
_atom_site_aniso_U_33
_atom_site_aniso_U_23
_atom_site_aniso_U_13
_atom_site_aniso_U_12
Ir1 0.03197(8) 0.02562(8) 0.02949(8) 0.00212(5) 0.01170(6) 0.00096(5) 
C2 0.037(2) 0.036(2) 0.032(2) -0.0003(17) 0.0109(18) 0.0001(17) 
N3 0.053(2) 0.041(2) 0.035(2) 0.0044(16) 0.0211(18) 0.0118(18) 
C4 0.045(2) 0.039(2) 0.037(2) 0.0012(18) 0.019(2) 0.0107(19) 
C5 0.049(3) 0.036(2) 0.046(3) -0.0075(19) 0.021(2) 0.003(2) 
C6 0.071(4) 0.036(2) 0.052(3) 0.005(2) 0.033(3) 0.014(2) 
C7 0.065(3) 0.051(3) 0.041(3) 0.001(2) 0.021(2) 0.025(3) 
C8 0.048(3) 0.051(3) 0.047(3) -0.007(2) 0.008(2) 0.014(2) 
C9 0.048(3) 0.042(3) 0.047(3) -0.004(2) 0.021(2) 0.004(2) 
C10 0.058(4) 0.055(3) 0.084(5) -0.004(3) 0.029(3) -0.003(3) 
C11 0.101(5) 0.070(4) 0.049(3) 0.013(3) 0.024(3) 0.048(4) 
C12 0.053(3) 0.052(3) 0.071(4) -0.011(3) 0.021(3) -0.006(3) 
C13 0.080(4) 0.070(4) 0.040(3) 0.010(3) 0.034(3) 0.028(3) 
C14 0.099(5) 0.087(5) 0.050(3) 0.020(3) 0.048(4) 0.031(4) 
C15 0.083(4) 0.064(4) 0.037(3) 0.013(2) 0.027(3) 0.022(3) 
N16 0.052(2) 0.046(2) 0.0333(19) 0.0089(16) 0.0197(18) 0.0145(18) 
C17 0.043(2) 0.042(2) 0.034(2) 0.0046(18) 0.0111(19) 0.0053(19) 
C18 0.041(2) 0.039(2) 0.049(3) 0.002(2) 0.016(2) 0.0016(19) 
C19 0.050(3) 0.036(2) 0.053(3) -0.004(2) 0.015(2) -0.002(2) 
C20 0.041(3) 0.043(3) 0.051(3) -0.002(2) 0.014(2) 0.004(2) 
C21 0.036(2) 0.047(3) 0.057(3) -0.004(2) 0.013(2) 0.000(2) 
C22 0.046(3) 0.041(3) 0.043(3) 0.000(2) 0.011(2) -0.003(2) 
C23 0.051(3) 0.041(3) 0.061(3) -0.012(2) 0.009(3) -0.007(2) 
C24 0.057(3) 0.051(3) 0.077(4) -0.008(3) 0.023(3) 0.009(3) 
C25 0.047(3) 0.062(4) 0.081(4) 0.007(3) 0.027(3) -0.003(3) 
C26 0.030(2) 0.0259(19) 0.038(2) 0.0004(16) 0.0132(17) 0.0006(15) 
N27 0.0351(18) 0.0361(19) 0.0315(18) -0.0009(14) 0.0147(15) -0.0081(15) 
C28 0.043(2) 0.035(2) 0.032(2) 0.0009(17) 0.0135(18) -0.0101(18) 
C29 0.054(3) 0.028(2) 0.043(2) 0.0051(18) 0.021(2) -0.0061(19) 
C30 0.057(3) 0.042(3) 0.059(3) 0.011(2) 0.025(3) 0.004(2) 
C31 0.075(4) 0.030(2) 0.048(3) 0.004(2) 0.027(3) -0.014(2) 
C32 0.072(4) 0.046(3) 0.034(2) 0.003(2) 0.015(2) -0.029(3) 
C33 0.048(3) 0.053(3) 0.040(3) 0.005(2) 0.009(2) -0.017(2) 
C34 0.043(2) 0.042(2) 0.032(2) 0.0036(18) 0.0099(19) -0.0070(19) 
C35 0.046(3) 0.055(3) 0.052(3) 0.002(2) 0.008(2) 0.006(2) 
C36 0.101(5) 0.054(3) 0.051(3) 0.001(3) 0.016(3) -0.042(4) 
C37 0.042(2) 0.045(3) 0.035(2) 0.0005(19) 0.0191(19) -0.007(2) 
C38 0.038(2) 0.047(3) 0.035(2) 0.0010(19) 0.0175(19) -0.0003(19) 
C39 0.037(2) 0.040(2) 0.032(2) -0.0020(17) 0.0126(18) -0.0031(18) 
N40 0.0324(17) 0.0342(18) 0.0293(17) -0.0012(14) 0.0139(14) -0.0028(14) 
C41 0.033(2) 0.032(2) 0.035(2) 0.0022(16) 0.0133(17) -0.0028(16) 
C42 0.035(2) 0.035(2) 0.042(2) 0.0012(18) 0.0178(19) 0.0004(17) 
C43 0.046(3) 0.043(3) 0.063(3) 0.012(2) 0.021(2) 0.010(2) 
C44 0.045(3) 0.036(2) 0.060(3) 0.008(2) 0.021(2) -0.001(2) 
C45 0.044(3) 0.046(3) 0.065(3) 0.005(2) 0.026(3) -0.009(2) 
C46 0.036(2) 0.047(3) 0.067(3) 0.005(2) 0.026(2) 0.003(2) 
C47 0.035(2) 0.035(2) 0.045(2) 0.0058(19) 0.0136(19) 0.0031(18) 
C48 0.038(2) 0.042(3) 0.056(3) 0.009(2) 0.010(2) 0.010(2) 
C49 0.062(4) 0.068(4) 0.117(6) 0.015(4) 0.055(4) -0.010(3) 
C52 0.077(3) 0.052(2) 0.089(3) -0.027(2) 0.051(2) -0.0101(19) 
C57 0.042(2) 0.029(2) 0.042(2) -0.0026(17) 0.022(2) -0.0033(17) 
C58 0.034(2) 0.0238(18) 0.043(2) 0.0004(16) 0.0213(18) 0.0019(15) 
C59 0.0281(19) 0.0257(18) 0.034(2) 0.0055(15) 0.0144(16) 0.0006(14) 
C60 0.0273(19) 0.0289(19) 0.034(2) 0.0021(15) 0.0150(16) 0.0018(15) 
C61 0.0263(18) 0.032(2) 0.033(2) 0.0067(16) 0.0122(16) 0.0010(15) 
C62 0.033(2) 0.038(2) 0.034(2) 0.0008(17) 0.0140(17) -0.0065(17) 
C63 0.0233(18) 0.045(2) 0.035(2) 0.0039(18) 0.0124(16) -0.0016(17) 
F64 0.0355(14) 0.0431(15) 0.0580(17) 0.0081(13) 0.0238(13) 0.0087(11) 
F65 0.0374(14) 0.074(2) 0.0426(15) 0.0153(14) 0.0232(12) 0.0105(14) 
F66 0.0266(13) 0.0583(18) 0.0591(18) -0.0057(14) 0.0148(12) -0.0076(12) 
B67 0.0247(19) 0.027(2) 0.032(2) 0.0029(16) 0.0137(17) 0.0020(15) 
C68 0.0257(18) 0.0236(17) 0.0328(19) 0.0033(14) 0.0120(15) 0.0015(14) 
C69 0.0264(18) 0.034(2) 0.0305(19) 0.0068(16) 0.0137(16) 0.0015(15) 
C70 0.0257(19) 0.035(2) 0.040(2) 0.0031(17) 0.0144(17) 0.0024(16) 
C71 0.029(2) 0.051(3) 0.044(3) 0.008(2) 0.0157(19) 0.0018(19) 
F72 0.0310(13) 0.0615(19) 0.0627(19) 0.0071(15) 0.0229(13) -0.0038(12) 
F73 0.0375(16) 0.102(3) 0.0526(19) -0.0164(18) 0.0141(14) -0.0132(17) 
F74 0.0346(16) 0.062(2) 0.122(3) 0.045(2) 0.0031(18) 0.0026(15) 
C75 0.032(2) 0.042(2) 0.037(2) 0.0035(18) 0.0216(18) 0.0049(17) 
C76 0.032(2) 0.034(2) 0.037(2) 0.0047(17) 0.0174(17) 0.0050(16) 
C77 0.0247(18) 0.032(2) 0.035(2) 0.0046(16) 0.0134(16) 0.0047(15) 
C78 0.039(2) 0.060(3) 0.042(3) 0.006(2) 0.021(2) 0.006(2) 
F79 0.0529(19) 0.122(3) 0.0427(17) 0.0018(19) 0.0315(15) 0.011(2) 
F80 0.099(3) 0.109(3) 0.049(2) -0.026(2) 0.029(2) -0.047(3) 
F81 0.085(3) 0.115(3) 0.0455(19) 0.028(2) 0.0234(19) 0.049(2) 
C82 0.0261(18) 0.0255(18) 0.036(2) -0.0002(15) 0.0151(16) -0.0028(14) 
C83 0.033(2) 0.0281(19) 0.033(2) 0.0030(15) 0.0167(17) 0.0020(15) 
C84 0.035(2) 0.0266(19) 0.035(2) 0.0020(16) 0.0147(17) 0.0006(16) 
C85 0.037(2) 0.033(2) 0.031(2) 0.0019(16) 0.0138(17) -0.0041(17) 
C86 0.033(2) 0.035(2) 0.035(2) -0.0024(17) 0.0165(17) -0.0052(17) 
C87 0.0273(19) 0.031(2) 0.039(2) -0.0007(16) 0.0156(17) 0.0007(15) 
C88 0.045(3) 0.068(3) 0.040(3) 0.004(2) 0.022(2) 0.009(2) 
F89 0.0508(19) 0.130(4) 0.0524(19) 0.013(2) 0.0312(16) 0.035(2) 
F90 0.120(4) 0.097(3) 0.104(3) 0.030(3) 0.092(3) 0.016(3) 
F91 0.073(2) 0.126(4) 0.052(2) -0.035(2) 0.0265(19) 0.015(2) 
C92 0.054(3) 0.040(2) 0.043(3) 0.010(2) 0.025(2) 0.013(2) 
F93 0.0450(17) 0.072(2) 0.087(3) 0.0223(19) 0.0312(18) 0.0202(16) 
F94 0.083(3) 0.0373(17) 0.093(3) 0.0002(17) 0.039(2) 0.0174(16) 
F95 0.095(3) 0.111(3) 0.055(2) 0.041(2) 0.037(2) 0.063(3) 
C96 0.0271(19) 0.0283(19) 0.041(2) 0.0032(16) 0.0189(17) 0.0015(15) 
C97 0.030(2) 0.0270(19) 0.047(2) 0.0015(17) 0.0194(18) -0.0019(15) 
C98 0.038(2) 0.028(2) 0.059(3) 0.0078(19) 0.022(2) 0.0043(17) 
C99 0.052(3) 0.023(2) 0.069(3) 0.003(2) 0.030(3) 0.0044(19) 
C100 0.052(3) 0.032(2) 0.052(3) -0.006(2) 0.025(2) -0.007(2) 
C101 0.038(2) 0.029(2) 0.043(2) 0.0004(17) 0.0174(19) -0.0006(17) 
C102 0.106(3) 0.063(3) 0.059(2) -0.013(2) 0.023(2) -0.028(2) 
C109 0.066(2) 0.052(2) 0.082(3) 0.022(2) 0.018(2) 0.017(2) 
F300 0.074(4) 0.045(4) 0.086(5) -0.027(4) 0.019(4) -0.004(3) 
F301 0.094(5) 0.062(4) 0.094(5) -0.034(3) 0.051(4) 0.013(4) 
F302 0.101(5) 0.066(5) 0.102(5) -0.033(4) 0.076(4) -0.014(4) 
F303 0.097(4) 0.049(3) 0.090(4) -0.027(3) 0.056(3) -0.033(3) 
F304 0.074(4) 0.072(4) 0.123(5) -0.059(4) 0.022(4) 0.020(3) 
F305 0.098(4) 0.070(4) 0.083(3) -0.030(3) 0.052(3) 0.004(3) 
F400 0.118(5) 0.101(5) 0.052(4) -0.005(4) 0.029(4) -0.047(4) 
F401 0.105(6) 0.046(3) 0.075(4) -0.021(3) 0.020(4) -0.023(4) 
F402 0.102(5) 0.082(5) 0.069(5) -0.025(4) 0.013(4) -0.026(4) 
F403 0.122(5) 0.089(5) 0.056(4) -0.024(4) 0.029(4) -0.025(4) 
F404 0.090(5) 0.074(4) 0.073(4) -0.012(3) 0.032(4) -0.041(4) 
F405 0.152(6) 0.063(4) 0.060(4) -0.012(3) -0.013(4) -0.015(4) 
F500 0.060(3) 0.088(4) 0.106(5) 0.027(4) 0.020(3) 0.031(3) 
F501 0.100(5) 0.057(3) 0.079(4) 0.010(3) -0.023(4) 0.027(3) 
F502 0.080(4) 0.060(3) 0.090(4) 0.044(3) 0.025(3) 0.007(3) 
F503 0.066(4) 0.072(5) 0.103(5) 0.032(4) -0.003(4) -0.002(4) 
F504 0.082(5) 0.085(5) 0.080(4) 0.012(4) 0.009(4) 0.036(4) 
F505 0.093(5) 0.041(3) 0.086(5) 0.013(4) 0.017(4) 0.025(4) 

_refine_ls_extinction_method 
    'None'
_oxford_refine_ls_scale 0.22649(9) 
loop_
 _geom_bond_atom_site_label_1
 _geom_bond_site_symmetry_1
 _geom_bond_atom_site_label_2
 _geom_bond_site_symmetry_2
 _geom_bond_distance
 _geom_bond_publ_flag
Ir1 . C2 . 2.046(4)    yes
Ir1 . H11 . 1.472    no
Ir1 . H12 . 1.431    no
Ir1 . C26 . 2.036(4)    yes
C2 . N3 . 1.335(6)    yes
C2 . N16 . 1.350(6)    yes
N3 . C4 . 1.440(6)    yes
N3 . C13 . 1.477(6)    yes
C4 . C5 . 1.402(7)    yes
C4 . C9 . 1.390(7)    yes
C5 . C6 . 1.395(7)    yes
C5 . C12 . 1.503(8)    yes
C6 . C7 . 1.383(8)    yes
C6 . H61 . 0.936    no
C7 . C8 . 1.380(8)    yes
C7 . C11 . 1.520(7)    yes
C8 . C9 . 1.388(7)    yes
C8 . H81 . 0.932    no
C9 . C10 . 1.511(8)    yes
C10 . H101 . 0.963    no
C10 . H102 . 0.964    no
C10 . H103 . 0.964    no
C11 . H111 . 0.959    no
C11 . H112 . 0.955    no
C11 . H113 . 0.955    no
C12 . H121 . 0.954    no
C12 . H122 . 0.961    no
C12 . H123 . 0.958    no
C13 . C14 . 1.504(9)    yes
C13 . H131 . 0.967    no
C13 . H132 . 0.968    no
C14 . C15 . 1.494(9)    yes
C14 . H141 . 0.976    no
C14 . H142 . 0.981    no
C15 . N16 . 1.468(6)    yes
C15 . H151 . 0.972    no
C15 . H152 . 0.964    no
N16 . C17 . 1.442(6)    yes
C17 . C18 . 1.406(7)    yes
C17 . C22 . 1.398(7)    yes
C18 . C19 . 1.386(7)    yes
C18 . C25 . 1.508(7)    yes
C19 . C20 . 1.399(7)    yes
C19 . H191 . 0.938    no
C20 . C21 . 1.377(7)    yes
C20 . C24 . 1.507(7)    yes
C21 . C22 . 1.397(7)    yes
C21 . H211 . 0.929    no
C22 . C23 . 1.510(7)    yes
C23 . H231 . 0.965    no
C23 . H232 . 0.966    no
C23 . H233 . 0.963    no
C24 . H241 . 0.966    no
C24 . H242 . 0.959    no
C24 . H243 . 0.959    no
C25 . H251 . 0.967    no
C25 . H252 . 0.966    no
C25 . H253 . 0.965    no
C26 . N27 . 1.349(5)    yes
C26 . N40 . 1.343(5)    yes
N27 . C28 . 1.443(5)    yes
N27 . C37 . 1.467(5)    yes
C28 . C29 . 1.396(7)    yes
C28 . C34 . 1.395(7)    yes
C29 . C30 . 1.491(7)    yes
C29 . C31 . 1.399(7)    yes
C30 . H301 . 0.954    no
C30 . H302 . 0.964    no
C30 . H303 . 0.964    no
C31 . C32 . 1.387(8)    yes
C31 . H311 . 0.933    no
C32 . C33 . 1.396(8)    yes
C32 . C36 . 1.513(7)    yes
C33 . C34 . 1.392(7)    yes
C33 . H331 . 0.933    no
C34 . C35 . 1.510(7)    yes
C35 . H351 . 0.967    no
C35 . H352 . 0.962    no
C35 . H353 . 0.961    no
C36 . H361 . 0.963    no
C36 . H362 . 0.960    no
C36 . H363 . 0.963    no
C37 . C38 . 1.514(7)    yes
C37 . H371 . 0.975    no
C37 . H372 . 0.977    no
C38 . C39 . 1.519(6)    yes
C38 . H381 . 0.967    no
C38 . H382 . 0.965    no
C39 . N40 . 1.469(5)    yes
C39 . H391 . 0.971    no
C39 . H392 . 0.979    no
N40 . C41 . 1.441(5)    yes
C41 . C42 . 1.404(6)    yes
C41 . C47 . 1.398(6)    yes
C42 . C43 . 1.508(6)    yes
C42 . C44 . 1.389(7)    yes
C43 . H431 . 0.962    no
C43 . H432 . 0.963    no
C43 . H433 . 0.962    no
C44 . C45 . 1.393(7)    yes
C44 . H441 . 0.933    no
C45 . C46 . 1.380(7)    yes
C45 . C49 . 1.503(7)    yes
C46 . C47 . 1.400(7)    yes
C46 . H461 . 0.928    no
C47 . C48 . 1.512(6)    yes
C48 . H481 . 0.958    no
C48 . H482 . 0.962    no
C48 . H483 . 0.960    no
C49 . H491 . 0.961    no
C49 . H492 . 0.958    no
C49 . H493 . 0.958    no
C52 . C57 . 1.467(5)    yes
C52 . F300 . 1.327(5)    yes
C52 . F301 . 1.364(5)    yes
C52 . F302 . 1.306(5)    yes
C52 . C57 . 1.467(5)    yes
C52 . F303 . 1.323(5)    yes
C52 . F304 . 1.321(5)    yes
C52 . F305 . 1.363(5)    yes
C57 . C58 . 1.394(6)    yes
C57 . C62 . 1.383(6)    yes
C58 . C59 . 1.399(6)    yes
C58 . H581 . 0.929    no
C59 . C60 . 1.401(5)    yes
C59 . B67 . 1.638(6)    yes
C60 . C61 . 1.388(6)    yes
C60 . H601 . 0.934    no
C61 . C62 . 1.381(6)    yes
C61 . C63 . 1.493(6)    yes
C62 . H621 . 0.935    no
C63 . F64 . 1.350(5)    yes
C63 . F65 . 1.338(5)    yes
C63 . F66 . 1.338(5)    yes
B67 . C68 . 1.632(6)    yes
B67 . C82 . 1.644(6)    yes
B67 . C96 . 1.639(6)    yes
C68 . C69 . 1.395(5)    yes
C68 . C77 . 1.401(6)    yes
C69 . C70 . 1.392(5)    yes
C69 . H691 . 0.931    no
C70 . C71 . 1.491(6)    yes
C70 . C75 . 1.392(6)    yes
C71 . F72 . 1.339(5)    yes
C71 . F73 . 1.340(6)    yes
C71 . F74 . 1.329(6)    yes
C75 . C76 . 1.387(6)    yes
C75 . H751 . 0.931    no
C76 . C77 . 1.385(5)    yes
C76 . C78 . 1.494(7)    yes
C77 . H771 . 0.936    no
C78 . F79 . 1.323(5)    yes
C78 . F80 . 1.334(7)    yes
C78 . F81 . 1.328(6)    yes
C82 . C83 . 1.406(6)    yes
C82 . C87 . 1.393(6)    yes
C83 . C84 . 1.395(6)    yes
C83 . H831 . 0.929    no
C84 . C85 . 1.379(6)    yes
C84 . C92 . 1.502(6)    yes
C85 . C86 . 1.388(6)    yes
C85 . H851 . 0.933    no
C86 . C87 . 1.394(6)    yes
C86 . C88 . 1.497(6)    yes
C87 . H871 . 0.933    no
C88 . F89 . 1.321(6)    yes
C88 . F90 . 1.342(7)    yes
C88 . F91 . 1.328(7)    yes
C92 . F93 . 1.339(6)    yes
C92 . F94 . 1.328(6)    yes
C92 . F95 . 1.331(6)    yes
C96 . C97 . 1.391(6)    yes
C96 . C101 . 1.395(6)    yes
C97 . C98 . 1.390(6)    yes
C97 . H971 . 0.933    no
C98 . C99 . 1.382(7)    yes
C98 . C109 . 1.478(5)    yes
C99 . C100 . 1.389(7)    yes
C99 . H991 . 0.935    no
C100 . C101 . 1.397(6)    yes
C100 . C102 . 1.472(6)    yes
C101 . H1011 . 0.933    no
C102 . F400 . 1.318(5)    yes
C102 . F401 . 1.335(5)    yes
C102 . F402 . 1.365(5)    yes
C102 . F403 . 1.364(5)    yes
C102 . F404 . 1.326(5)    yes
C102 . F405 . 1.329(5)    yes
C109 . F500 . 1.348(5)    yes
C109 . F501 . 1.320(5)    yes
C109 . F502 . 1.311(5)    yes
C109 . F503 . 1.323(5)    yes
C109 . F504 . 1.347(5)    yes
C109 . F505 . 1.312(5)    yes
loop_
 _geom_angle_atom_site_label_1
 _geom_angle_site_symmetry_1
 _geom_angle_atom_site_label_2
 _geom_angle_site_symmetry_2
 _geom_angle_atom_site_label_3
 _geom_angle_site_symmetry_3
 _geom_angle
 _geom_angle_publ_flag
C2 . Ir1 . H11 . 90.5    no
C2 . Ir1 . H12 . 79.3    no
H11 . Ir1 . H12 . 74.8    no
C2 . Ir1 . C26 . 176.05(17)    yes
H11 . Ir1 . C26 . 86.9    no
H12 . Ir1 . C26 . 97.1    no
Ir1 . C2 . N3 . 128.2(3)    yes
Ir1 . C2 . N16 . 113.9(3)    yes
N3 . C2 . N16 . 117.5(4)    yes
C2 . N3 . C4 . 120.6(4)    yes
C2 . N3 . C13 . 123.9(4)    yes
C4 . N3 . C13 . 115.6(4)    yes
N3 . C4 . C5 . 119.3(4)    yes
N3 . C4 . C9 . 118.9(5)    yes
C5 . C4 . C9 . 121.6(5)    yes
C4 . C5 . C6 . 117.4(5)    yes
C4 . C5 . C12 . 121.9(5)    yes
C6 . C5 . C12 . 120.7(5)    yes
C5 . C6 . C7 . 122.1(5)    yes
C5 . C6 . H61 . 119.0    no
C7 . C6 . H61 . 119.0    no
C6 . C7 . C8 . 118.7(5)    yes
C6 . C7 . C11 . 120.5(6)    yes
C8 . C7 . C11 . 120.8(6)    yes
C7 . C8 . C9 . 121.7(5)    yes
C7 . C8 . H81 . 119.4    no
C9 . C8 . H81 . 119.0    no
C4 . C9 . C8 . 118.5(5)    yes
C4 . C9 . C10 . 120.8(5)    yes
C8 . C9 . C10 . 120.7(5)    yes
C9 . C10 . H101 . 109.9    no
C9 . C10 . H102 . 109.7    no
H101 . C10 . H102 . 109.2    no
C9 . C10 . H103 . 109.8    no
H101 . C10 . H103 . 108.8    no
H102 . C10 . H103 . 109.4    no
C7 . C11 . H111 . 110.0    no
C7 . C11 . H112 . 109.1    no
H111 . C11 . H112 . 109.4    no
C7 . C11 . H113 . 109.9    no
H111 . C11 . H113 . 109.3    no
H112 . C11 . H113 . 109.2    no
C5 . C12 . H121 . 110.7    no
C5 . C12 . H122 . 110.4    no
H121 . C12 . H122 . 108.6    no
C5 . C12 . H123 . 110.3    no
H121 . C12 . H123 . 108.2    no
H122 . C12 . H123 . 108.5    no
N3 . C13 . C14 . 111.0(5)    yes
N3 . C13 . H131 . 109.4    no
C14 . C13 . H131 . 107.8    no
N3 . C13 . H132 . 109.0    no
C14 . C13 . H132 . 109.7    no
H131 . C13 . H132 . 110.0    no
C13 . C14 . C15 . 110.9(6)    yes
C13 . C14 . H141 . 109.2    no
C15 . C14 . H141 . 108.8    no
C13 . C14 . H142 . 108.7    no
C15 . C14 . H142 . 109.0    no
H141 . C14 . H142 . 110.2    no
C14 . C15 . N16 . 109.2(5)    yes
C14 . C15 . H151 . 109.8    no
N16 . C15 . H151 . 110.2    no
C14 . C15 . H152 . 109.5    no
N16 . C15 . H152 . 109.0    no
H151 . C15 . H152 . 109.3    no
C15 . N16 . C2 . 125.4(4)    yes
C15 . N16 . C17 . 118.6(4)    yes
C2 . N16 . C17 . 116.0(4)    yes
N16 . C17 . C18 . 117.8(4)    yes
N16 . C17 . C22 . 120.5(4)    yes
C18 . C17 . C22 . 121.6(5)    yes
C17 . C18 . C19 . 118.3(5)    yes
C17 . C18 . C25 . 120.4(5)    yes
C19 . C18 . C25 . 121.2(5)    yes
C18 . C19 . C20 . 121.6(5)    yes
C18 . C19 . H191 . 119.4    no
C20 . C19 . H191 . 119.0    no
C19 . C20 . C21 . 118.4(5)    yes
C19 . C20 . C24 . 120.4(5)    yes
C21 . C20 . C24 . 121.2(5)    yes
C20 . C21 . C22 . 122.6(5)    yes
C20 . C21 . H211 . 119.2    no
C22 . C21 . H211 . 118.3    no
C17 . C22 . C21 . 117.5(5)    yes
C17 . C22 . C23 . 123.0(5)    yes
C21 . C22 . C23 . 119.2(5)    yes
C22 . C23 . H231 . 110.6    no
C22 . C23 . H232 . 108.9    no
H231 . C23 . H232 . 109.0    no
C22 . C23 . H233 . 110.1    no
H231 . C23 . H233 . 109.5    no
H232 . C23 . H233 . 108.7    no
C20 . C24 . H241 . 109.6    no
C20 . C24 . H242 . 110.4    no
H241 . C24 . H242 . 108.8    no
C20 . C24 . H243 . 109.8    no
H241 . C24 . H243 . 108.6    no
H242 . C24 . H243 . 109.6    no
C18 . C25 . H251 . 109.1    no
C18 . C25 . H252 . 110.5    no
H251 . C25 . H252 . 109.2    no
C18 . C25 . H253 . 109.6    no
H251 . C25 . H253 . 109.4    no
H252 . C25 . H253 . 109.1    no
Ir1 . C26 . N27 . 129.6(3)    yes
Ir1 . C26 . N40 . 113.5(3)    yes
N27 . C26 . N40 . 116.8(4)    yes
C26 . N27 . C28 . 121.0(4)    yes
C26 . N27 . C37 . 123.7(4)    yes
C28 . N27 . C37 . 115.2(3)    yes
N27 . C28 . C29 . 119.6(4)    yes
N27 . C28 . C34 . 118.2(4)    yes
C29 . C28 . C34 . 121.9(4)    yes
C28 . C29 . C30 . 121.9(4)    yes
C28 . C29 . C31 . 117.5(5)    yes
C30 . C29 . C31 . 120.6(5)    yes
C29 . C30 . H301 . 109.8    no
C29 . C30 . H302 . 111.0    no
H301 . C30 . H302 . 107.8    no
C29 . C30 . H303 . 111.1    no
H301 . C30 . H303 . 108.6    no
H302 . C30 . H303 . 108.4    no
C29 . C31 . C32 . 122.2(5)    yes
C29 . C31 . H311 . 118.5    no
C32 . C31 . H311 . 119.4    no
C31 . C32 . C33 . 118.4(5)    yes
C31 . C32 . C36 . 120.5(6)    yes
C33 . C32 . C36 . 121.0(6)    yes
C32 . C33 . C34 . 121.4(5)    yes
C32 . C33 . H331 . 119.3    no
C34 . C33 . H331 . 119.3    no
C28 . C34 . C33 . 118.5(5)    yes
C28 . C34 . C35 . 121.5(4)    yes
C33 . C34 . C35 . 120.1(5)    yes
C34 . C35 . H351 . 109.3    no
C34 . C35 . H352 . 109.7    no
H351 . C35 . H352 . 110.0    no
C34 . C35 . H353 . 109.0    no
H351 . C35 . H353 . 109.9    no
H352 . C35 . H353 . 109.0    no
C32 . C36 . H361 . 110.0    no
C32 . C36 . H362 . 110.3    no
H361 . C36 . H362 . 109.3    no
C32 . C36 . H363 . 109.1    no
H361 . C36 . H363 . 108.8    no
H362 . C36 . H363 . 109.3    no
N27 . C37 . C38 . 110.4(4)    yes
N27 . C37 . H371 . 109.3    no
C38 . C37 . H371 . 109.2    no
N27 . C37 . H372 . 109.0    no
C38 . C37 . H372 . 110.0    no
H371 . C37 . H372 . 108.9    no
C37 . C38 . C39 . 109.5(4)    yes
C37 . C38 . H381 . 108.7    no
C39 . C38 . H381 . 110.2    no
C37 . C38 . H382 . 108.8    no
C39 . C38 . H382 . 109.3    no
H381 . C38 . H382 . 110.4    no
C38 . C39 . N40 . 107.7(4)    yes
C38 . C39 . H391 . 109.9    no
N40 . C39 . H391 . 109.7    no
C38 . C39 . H392 . 110.3    no
N40 . C39 . H392 . 110.0    no
H391 . C39 . H392 . 109.3    no
C39 . N40 . C26 . 126.8(4)    yes
C39 . N40 . C41 . 118.4(3)    yes
C26 . N40 . C41 . 114.8(3)    yes
N40 . C41 . C42 . 118.4(4)    yes
N40 . C41 . C47 . 119.5(4)    yes
C42 . C41 . C47 . 121.8(4)    yes
C41 . C42 . C43 . 121.0(4)    yes
C41 . C42 . C44 . 117.9(4)    yes
C43 . C42 . C44 . 121.0(4)    yes
C42 . C43 . H431 . 110.9    no
C42 . C43 . H432 . 109.8    no
H431 . C43 . H432 . 108.2    no
C42 . C43 . H433 . 110.3    no
H431 . C43 . H433 . 108.6    no
H432 . C43 . H433 . 109.0    no
C42 . C44 . C45 . 122.2(5)    yes
C42 . C44 . H441 . 118.7    no
C45 . C44 . H441 . 119.0    no
C44 . C45 . C46 . 118.0(5)    yes
C44 . C45 . C49 . 121.1(5)    yes
C46 . C45 . C49 . 120.9(5)    yes
C45 . C46 . C47 . 122.6(5)    yes
C45 . C46 . H461 . 118.1    no
C47 . C46 . H461 . 119.2    no
C46 . C47 . C41 . 117.4(4)    yes
C46 . C47 . C48 . 119.9(4)    yes
C41 . C47 . C48 . 122.5(4)    yes
C47 . C48 . H481 . 110.2    no
C47 . C48 . H482 . 109.4    no
H481 . C48 . H482 . 108.5    no
C47 . C48 . H483 . 110.0    no
H481 . C48 . H483 . 109.4    no
H482 . C48 . H483 . 109.4    no
C45 . C49 . H491 . 110.6    no
C45 . C49 . H492 . 109.5    no
H491 . C49 . H492 . 109.3    no
C45 . C49 . H493 . 109.7    no
H491 . C49 . H493 . 109.3    no
H492 . C49 . H493 . 108.4    no
C57 . C52 . F300 . 116.6(5)    yes
C57 . C52 . F301 . 104.9(4)    yes
F300 . C52 . F301 . 104.28(6)    yes
C57 . C52 . F302 . 120.5(4)    yes
F300 . C52 . F302 . 104.35(6)    yes
F301 . C52 . F302 . 104.31(6)    yes
C57 . C52 . F303 . 115.9(4)    yes
C57 . C52 . F304 . 117.0(4)    yes
F303 . C52 . F304 . 104.37(6)    yes
C57 . C52 . F305 . 109.7(4)    yes
F303 . C52 . F305 . 104.27(6)    yes
F304 . C52 . F305 . 104.27(6)    yes
C52 . C57 . C58 . 119.9(4)    yes
C52 . C57 . C62 . 119.3(4)    yes
C58 . C57 . C62 . 120.8(4)    yes
C57 . C58 . C59 . 122.5(4)    yes
C57 . C58 . H581 . 118.1    no
C59 . C58 . H581 . 119.4    no
C58 . C59 . C60 . 115.2(4)    yes
C58 . C59 . B67 . 124.1(3)    yes
C60 . C59 . B67 . 120.5(4)    yes
C59 . C60 . C61 . 122.6(4)    yes
C59 . C60 . H601 . 119.1    no
C61 . C60 . H601 . 118.2    no
C60 . C61 . C62 . 120.9(4)    yes
C60 . C61 . C63 . 117.7(4)    yes
C62 . C61 . C63 . 121.4(4)    yes
C57 . C62 . C61 . 118.1(4)    yes
C57 . C62 . H621 . 120.8    no
C61 . C62 . H621 . 121.1    no
C61 . C63 . F64 . 111.7(3)    yes
C61 . C63 . F65 . 112.1(3)    yes
F64 . C63 . F65 . 105.7(4)    yes
C61 . C63 . F66 . 113.2(4)    yes
F64 . C63 . F66 . 106.4(3)    yes
F65 . C63 . F66 . 107.3(3)    yes
C59 . B67 . C68 . 113.7(3)    yes
C59 . B67 . C82 . 103.9(3)    yes
C68 . B67 . C82 . 112.9(3)    yes
C59 . B67 . C96 . 110.8(3)    yes
C68 . B67 . C96 . 104.3(3)    yes
C82 . B67 . C96 . 111.5(3)    yes
B67 . C68 . C69 . 120.6(4)    yes
B67 . C68 . C77 . 123.4(3)    yes
C69 . C68 . C77 . 115.7(4)    yes
C68 . C69 . C70 . 122.3(4)    yes
C68 . C69 . H691 . 119.4    no
C70 . C69 . H691 . 118.3    no
C69 . C70 . C71 . 119.1(4)    yes
C69 . C70 . C75 . 121.0(4)    yes
C71 . C70 . C75 . 119.8(4)    yes
C70 . C71 . F72 . 112.9(4)    yes
C70 . C71 . F73 . 112.4(4)    yes
F72 . C71 . F73 . 104.7(4)    yes
C70 . C71 . F74 . 112.9(4)    yes
F72 . C71 . F74 . 106.2(4)    yes
F73 . C71 . F74 . 107.1(4)    yes
C70 . C75 . C76 . 117.4(4)    yes
C70 . C75 . H751 . 121.5    no
C76 . C75 . H751 . 121.1    no
C75 . C76 . C77 . 121.2(4)    yes
C75 . C76 . C78 . 119.8(4)    yes
C77 . C76 . C78 . 119.0(4)    yes
C68 . C77 . C76 . 122.4(4)    yes
C68 . C77 . H771 . 118.7    no
C76 . C77 . H771 . 118.9    no
C76 . C78 . F79 . 114.4(4)    yes
C76 . C78 . F80 . 111.8(4)    yes
F79 . C78 . F80 . 106.1(5)    yes
C76 . C78 . F81 . 112.3(4)    yes
F79 . C78 . F81 . 107.0(4)    yes
F80 . C78 . F81 . 104.6(5)    yes
B67 . C82 . C83 . 124.2(3)    yes
B67 . C82 . C87 . 120.3(4)    yes
C83 . C82 . C87 . 115.3(4)    yes
C82 . C83 . C84 . 122.3(4)    yes
C82 . C83 . H831 . 119.3    no
C84 . C83 . H831 . 118.4    no
C83 . C84 . C85 . 120.9(4)    yes
C83 . C84 . C92 . 118.3(4)    yes
C85 . C84 . C92 . 120.9(4)    yes
C84 . C85 . C86 . 118.2(4)    yes
C84 . C85 . H851 . 120.9    no
C86 . C85 . H851 . 120.9    no
C85 . C86 . C87 . 120.6(4)    yes
C85 . C86 . C88 . 119.1(4)    yes
C87 . C86 . C88 . 120.3(4)    yes
C86 . C87 . C82 . 122.7(4)    yes
C86 . C87 . H871 . 119.1    no
C82 . C87 . H871 . 118.3    no
C86 . C88 . F89 . 113.9(4)    yes
C86 . C88 . F90 . 111.9(5)    yes
F89 . C88 . F90 . 107.8(5)    yes
C86 . C88 . F91 . 112.2(4)    yes
F89 . C88 . F91 . 106.4(5)    yes
F90 . C88 . F91 . 104.0(5)    yes
C84 . C92 . F93 . 112.4(4)    yes
C84 . C92 . F94 . 112.2(4)    yes
F93 . C92 . F94 . 105.4(4)    yes
C84 . C92 . F95 . 113.0(4)    yes
F93 . C92 . F95 . 106.2(5)    yes
F94 . C92 . F95 . 107.0(4)    yes
B67 . C96 . C97 . 121.0(4)    yes
B67 . C96 . C101 . 122.5(4)    yes
C97 . C96 . C101 . 116.3(4)    yes
C96 . C97 . C98 . 122.3(4)    yes
C96 . C97 . H971 . 119.3    no
C98 . C97 . H971 . 118.4    no
C97 . C98 . C99 . 120.9(4)    yes
C97 . C98 . C109 . 119.3(4)    yes
C99 . C98 . C109 . 119.8(4)    yes
C98 . C99 . C100 . 117.9(4)    yes
C98 . C99 . H991 . 120.9    no
C100 . C99 . H991 . 121.2    no
C99 . C100 . C101 . 120.9(5)    yes
C99 . C100 . C102 . 119.8(4)    yes
C101 . C100 . C102 . 119.4(5)    yes
C100 . C101 . C96 . 121.7(4)    yes
C100 . C101 . H1011 . 118.4    no
C96 . C101 . H1011 . 119.9    no
C100 . C102 . F400 . 120.1(5)    yes
C100 . C102 . F401 . 112.6(5)    yes
F400 . C102 . F401 . 104.41(6)    yes
C100 . C102 . F402 . 109.6(5)    yes
F400 . C102 . F402 . 104.37(6)    yes
F401 . C102 . F402 . 104.35(6)    yes
C100 . C102 . F403 . 108.0(5)    yes
C100 . C102 . F404 . 116.4(5)    yes
F403 . C102 . F404 . 104.36(6)    yes
C100 . C102 . F405 . 117.9(5)    yes
F403 . C102 . F405 . 104.36(6)    yes
F404 . C102 . F405 . 104.42(6)    yes
C98 . C109 . F500 . 109.2(4)    yes
C98 . C109 . F501 . 117.5(4)    yes
F500 . C109 . F501 . 104.97(6)    yes
C98 . C109 . F502 . 114.2(4)    yes
F500 . C109 . F502 . 104.92(6)    yes
F501 . C109 . F502 . 105.03(6)    yes
C98 . C109 . F503 . 117.1(5)    yes
C98 . C109 . F504 . 106.5(5)    yes
F503 . C109 . F504 . 104.92(6)    yes
C98 . C109 . F505 . 117.2(5)    yes
F503 . C109 . F505 . 104.97(6)    yes
F504 . C109 . F505 . 104.91(6)    yes


_iucr_refine_instruction_details_constraints
;
#
# Punched on 22/08/12 at 12:31:53
#
#LIST     12                                                                    
BLOCK SCALE X'S, U'S 
EQUIV PART(1001,OCC) PART(1002,OCC) 
WEIGHT -1 PART(1002,OCC) 
EQUIV PART(2001,OCC) PART(2002,OCC) 
WEIGHT -1 PART(2002,OCC) 
EQUIV PART(3001,OCC) PART(3002,OCC) 
WEIGHT -1 PART(3002,OCC) 
RIDE IR  (   1,X'S) H   (  11,X'S) H   (  12,X'S) 
RIDE C   (   6,X'S) H   (  61,X'S) 
RIDE C   (   8,X'S) H   (  81,X'S) 
RIDE C   (  10,X'S) H   ( 101,X'S) H   ( 102,X'S) H   ( 103,X'S) 
RIDE C   (  11,X'S) H   ( 111,X'S) H   ( 112,X'S) H   ( 113,X'S) 
RIDE C   (  12,X'S) H   ( 121,X'S) H   ( 122,X'S) H   ( 123,X'S) 
RIDE C   (  13,X'S) H   ( 131,X'S) H   ( 132,X'S) 
RIDE C   (  14,X'S) H   ( 141,X'S) H   ( 142,X'S) 
RIDE C   (  15,X'S) H   ( 151,X'S) H   ( 152,X'S) 
RIDE C   (  19,X'S) H   ( 191,X'S) 
RIDE C   (  21,X'S) H   ( 211,X'S) 
RIDE C   (  23,X'S) H   ( 231,X'S) H   ( 232,X'S) H   ( 233,X'S) 
RIDE C   (  24,X'S) H   ( 241,X'S) H   ( 242,X'S) H   ( 243,X'S) 
RIDE C   (  25,X'S) H   ( 251,X'S) H   ( 252,X'S) H   ( 253,X'S) 
RIDE C   (  30,X'S) H   ( 301,X'S) H   ( 302,X'S) H   ( 303,X'S) 
RIDE C   (  31,X'S) H   ( 311,X'S) 
RIDE C   (  33,X'S) H   ( 331,X'S) 
RIDE C   (  35,X'S) H   ( 351,X'S) H   ( 352,X'S) H   ( 353,X'S) 
RIDE C   (  36,X'S) H   ( 361,X'S) H   ( 362,X'S) H   ( 363,X'S) 
RIDE C   (  37,X'S) H   ( 371,X'S) H   ( 372,X'S) 
RIDE C   (  38,X'S) H   ( 381,X'S) H   ( 382,X'S) 
RIDE C   (  39,X'S) H   ( 391,X'S) H   ( 392,X'S) 
RIDE C   (  43,X'S) H   ( 431,X'S) H   ( 432,X'S) H   ( 433,X'S) 
RIDE C   (  44,X'S) H   ( 441,X'S) 
RIDE C   (  46,X'S) H   ( 461,X'S) 
RIDE C   (  48,X'S) H   ( 481,X'S) H   ( 482,X'S) H   ( 483,X'S) 
RIDE C   (  49,X'S) H   ( 491,X'S) H   ( 492,X'S) H   ( 493,X'S) 
RIDE C   (  58,X'S) H   ( 581,X'S) 
RIDE C   (  60,X'S) H   ( 601,X'S) 
RIDE C   (  62,X'S) H   ( 621,X'S) 
RIDE C   (  69,X'S) H   ( 691,X'S) 
RIDE C   (  75,X'S) H   ( 751,X'S) 
RIDE C   (  77,X'S) H   ( 771,X'S) 
RIDE C   (  83,X'S) H   ( 831,X'S) 
RIDE C   (  85,X'S) H   ( 851,X'S) 
RIDE C   (  87,X'S) H   ( 871,X'S) 
RIDE C   (  97,X'S) H   ( 971,X'S) 
RIDE C   (  99,X'S) H   ( 991,X'S) 
RIDE C   ( 101,X'S) H   (1011,X'S) 
END                                                                             
;


_iucr_refine_instruction_details_restraints
;
#
# Punched on 22/08/12 at 12:31:53
#
#LIST     16                                                                    
SAME C(52) F(300) F(301) F(302) AND 
CONT C(52) F(301) F(302) F(300) AND 
CONT C(52) F(302) F(300) F(301) AND 
CONT C(52) F(303) F(304) F(305) AND 
CONT C(52) F(304) F(305) F(303) AND 
CONT C(52) F(305) F(303) F(304) 
SIMU 0.01  C(52) F(300) F(301) F(302) AND 
CONT C(52) F(301) F(302) F(300) AND 
CONT C(52) F(302) F(300) F(301) AND 
CONT C(52) F(303) F(304) F(305) AND 
CONT C(52) F(304) F(305) F(303) AND 
CONT C(52) F(305) F(303) F(304) 
DELU 0.01  C(52) F(300) F(301) F(302) AND 
CONT C(52) F(301) F(302) F(300) AND 
CONT C(52) F(302) F(300) F(301) AND 
CONT C(52) F(303) F(304) F(305) AND 
CONT C(52) F(304) F(305) F(303) AND 
CONT C(52) F(305) F(303) F(304) 
SAME C(102) F(400) F(401) F(402) AND 
CONT C(102) F(401) F(402) F(400) AND 
CONT C(102) F(402) F(400) F(401) AND 
CONT C(102) F(403) F(404) F(405) AND 
CONT C(102) F(404) F(405) F(403) AND 
CONT C(102) F(405) F(403) F(404) 
SIMU 0.01  C(102) F(400) F(401) F(402) AND 
CONT C(102) F(401) F(402) F(400) AND 
CONT C(102) F(402) F(400) F(401) AND 
CONT C(102) F(403) F(404) F(405) AND 
CONT C(102) F(404) F(405) F(403) AND 
CONT C(102) F(405) F(403) F(404) 
DELU 0.01  C(102) F(400) F(401) F(402) AND 
CONT C(102) F(401) F(402) F(400) AND 
CONT C(102) F(402) F(400) F(401) AND 
CONT C(102) F(403) F(404) F(405) AND 
CONT C(102) F(404) F(405) F(403) AND 
CONT C(102) F(405) F(403) F(404) 
SAME C(109) F(500) F(501) F(502) AND 
CONT C(109) F(501) F(502) F(500) AND 
CONT C(109) F(502) F(500) F(501) AND 
CONT C(109) F(503) F(504) F(505) AND 
CONT C(109) F(504) F(505) F(503) AND 
CONT C(109) F(505) F(503) F(504) 
SIMU 0.01  C(109) F(500) F(501) F(502) AND 
CONT C(109) F(501) F(502) F(500) AND 
CONT C(109) F(502) F(500) F(501) AND 
CONT C(109) F(503) F(504) F(505) AND 
CONT C(109) F(504) F(505) F(503) AND 
CONT C(109) F(505) F(503) F(504) 
DELU 0.01  C(109) F(500) F(501) F(502) AND 
CONT C(109) F(501) F(502) F(500) AND 
CONT C(109) F(502) F(500) F(501) AND 
CONT C(109) F(503) F(504) F(505) AND 
CONT C(109) F(504) F(505) F(503) AND 
CONT C(109) F(505) F(503) F(504) 
REM   HREST   START (DO NOT REMOVE THIS LINE) 
REM   HREST   END (DO NOT REMOVE THIS LINE) 
END                                                                             
;
#==============================================================================
data_3b
#==============================================================================
_audit_creation_date        "12-08-23"
_audit_creation_method CRYSTALS_ver_14.23

_oxford_structure_analysis_title  '038jrnp12'
_chemical_name_systematic         .
_chemical_melting_point           .

_cell_length_a                    13.0310(2)
_cell_length_b                    14.9560(2)
_cell_length_c                    19.9381(3)
_cell_angle_alpha                 99.3037(5)
_cell_angle_beta                  104.8178(6)
_cell_angle_gamma                 91.3768(5)
_cell_volume                      3698.41(9)
 
_symmetry_cell_setting            'triclinic' 
_symmetry_space_group_name_H-M    'P -1 ' 
_symmetry_space_group_name_Hall   '-P 1'
loop_
 _symmetry_equiv_pos_as_xyz
 'x,y,z'
 '-x,-y,-z'

loop_
_atom_type_symbol
_atom_type_scat_dispersion_real
_atom_type_scat_dispersion_imag
_atom_type_scat_Cromer_Mann_a1
_atom_type_scat_Cromer_Mann_b1
_atom_type_scat_Cromer_Mann_a2
_atom_type_scat_Cromer_Mann_b2
_atom_type_scat_Cromer_Mann_a3
_atom_type_scat_Cromer_Mann_b3
_atom_type_scat_Cromer_Mann_a4
_atom_type_scat_Cromer_Mann_b4
_atom_type_scat_Cromer_Mann_c
_atom_type_scat_source  
 C       0.0033   0.0016   2.3100  20.8439   1.0200  10.2075   1.5886   0.5687
   0.8650  51.6512   0.2156 'International Tables Vol C 4.2.6.8 and 6.1.1.4'
 H       0.0000   0.0000   0.4930  10.5109   0.3229  26.1257   0.1402   3.1424
   0.0408  57.7998   0.0030 'International Tables Vol C 4.2.6.8 and 6.1.1.4'
 Ir     -1.4442   7.9887  27.3049   1.5928  16.7296   8.8655  15.6115   0.4179
   5.8338  45.0011  11.4722 'International Tables Vol C 4.2.6.8 and 6.1.1.4'
 N       0.0061   0.0033  12.2126   0.0057   3.1322   9.8933   2.0125  28.9975
   1.1663   0.5826 -11.5290 'International Tables Vol C 4.2.6.8 and 6.1.1.4'
 B       0.0013   0.0007   2.0545  23.2185   1.3326   1.0210   1.0979  60.3498
   0.7068   0.1403  -0.1932 'International Tables Vol C 4.2.6.8 and 6.1.1.4'
 F       0.0171   0.0103   3.5392  10.2825   2.6412   4.2944   1.5170   0.2615
   1.0243  26.1476   0.2776 'International Tables Vol C 4.2.6.8 and 6.1.1.4'
 
 
_cell_formula_units_Z                    2

# Given Formula = C78 H72 B1 F24 Ir1 N4 
# Dc =      1.55 Fooo =   1736.00 Mu =     19.12 M =   1724.44
# Found Formula = C78 H74 B1 F24.00 Ir1 N4 
# Dc =      1.55 FOOO =   1736.00 Mu =     19.12 M =   1726.45

_chemical_formula_sum             'C78 H74 B1 F24 Ir1 N4'
_chemical_formula_moiety          'C32 H12 B F24, C46 H62 Ir N4'
_chemical_compound_source                .
_chemical_formula_weight           1726.45
 
 
_cell_measurement_reflns_used        15191
_cell_measurement_theta_min              5
_cell_measurement_theta_max             27
_cell_measurement_temperature          150
 
_exptl_crystal_description        'block' 
_exptl_crystal_colour             'yellow' 
_exptl_crystal_size_min           0.120 
_exptl_crystal_size_mid           0.140 
_exptl_crystal_size_max           0.160 
 
_exptl_crystal_density_diffrn     1.550 
_exptl_crystal_density_meas       . 
_exptl_crystal_density_method     'not measured' 
# Non-dispersive F(000): 
_exptl_crystal_F_000              1736 
_exptl_absorpt_coefficient_mu     1.912 
 
# Sheldrick geometric approximatio 0.77 0.79 
_exptl_absorpt_correction_type    multi-scan 
_exptl_absorpt_process_details    'DENZO/SCALEPACK (Otwinowski & Minor, 1997)' 
_exptl_absorpt_correction_T_min   0.77 
_exptl_absorpt_correction_T_max   0.79 
# For a Kappa CCD, set Tmin to 1.0 and 
# Tmax to the ratio of max:min frame scales in scale_all.log 
_diffrn_measurement_device_type   'Nonius KappaCCD' 
_diffrn_measurement_device        'Area' 
_diffrn_radiation_monochromator   'graphite' 
_diffrn_radiation_type            'Mo K\a'
_diffrn_radiation_wavelength           0.71073
_diffrn_measurement_method        \w 
 
# If a reference occurs more than once, delete the author 
# and date from subsequent references. 
_computing_data_collection        'COLLECT (Nonius, 2001).' 
_computing_cell_refinement        'DENZO/SCALEPACK (Otwinowski & Minor, 1997)' 
_computing_data_reduction         'DENZO/SCALEPACK (Otwinowski & Minor, 1997)' 
_computing_structure_solution     'Superflip (Palatinus & Chapuis, 2007)' 
_computing_structure_refinement   'CRYSTALS (Betteridge et al., 2003)' 
_computing_publication_material   'CRYSTALS (Betteridge et al., 2003)' 
_computing_molecular_graphics     'CAMERON (Watkin et al., 1996)' 
 
_diffrn_standards_interval_time   . 
_diffrn_standards_interval_count  . 
_diffrn_standards_number          0 
_diffrn_standards_decay_%         . 
 
_diffrn_ambient_temperature        150
_diffrn_reflns_number             61453 
_reflns_number_total              16739 
_diffrn_reflns_av_R_equivalents   0.048 
# Number of reflections without Friedels Law is 27532 
# Number of reflections with Friedels Law is 16739 
# Theoretical number of reflections is about 16952 
 
 
_diffrn_reflns_theta_min          5.092 
_diffrn_reflns_theta_max          27.476 
_diffrn_measured_fraction_theta_max 0.988 
 
_diffrn_reflns_theta_full         25.003 
_diffrn_measured_fraction_theta_full 0.991 
 
 
_diffrn_reflns_limit_h_min        -15 
_diffrn_reflns_limit_h_max        16 
_diffrn_reflns_limit_k_min        -19 
_diffrn_reflns_limit_k_max        19 
_diffrn_reflns_limit_l_min        -25 
_diffrn_reflns_limit_l_max        22 
_reflns_limit_h_min               -16 
_reflns_limit_h_max               16 
_reflns_limit_k_min               -19 
_reflns_limit_k_max               19 
_reflns_limit_l_min               0 
_reflns_limit_l_max               25 
 
_oxford_diffrn_Wilson_B_factor    1.83 
_oxford_diffrn_Wilson_scale       138.90 
 
_atom_sites_solution_primary      Other  #heavy,direct,difmap,geom
# _atom_sites_solution_secondary  difmap
_atom_sites_solution_hydrogens    difmap
 
_refine_diff_density_min          -3.27 
_refine_diff_density_max          3.89 
 
 
# The current dictionary definitions do not cover the 
# situation where the reflections used for refinement were 
# selected by a user-defined sigma threshold 
 
 
# The values actually used during refinement 
_oxford_reflns_threshold_expression_ref     I>-3.0\s(I)
_refine_ls_number_reflns          16739 
_refine_ls_number_restraints      486 
_refine_ls_number_parameters      1057 
_oxford_refine_ls_R_factor_ref    0.0816 
_refine_ls_wR_factor_ref          0.1143 
_refine_ls_goodness_of_fit_ref    0.9598 
_refine_ls_shift/su_max           0.0073713 
_refine_ls_shift/su_mean          0.0001297 
 
 
# The values computed from all data 
_oxford_reflns_number_all         16739 
_refine_ls_R_factor_all           0.0816 
_refine_ls_wR_factor_all          0.1143 
 
# The values computed with a 2 sigma cutoff - a la SHELX 
_reflns_threshold_expression      I>2.0\s(I)
_reflns_number_gt                 12239 
_refine_ls_R_factor_gt            0.0478 
_refine_ls_wR_factor_gt           0.0838 
 
# choose from: rm (reference molecule of known chirality), 
# ad (anomolous dispersion - Flack), rmad (rm and ad), 
# syn (from synthesis), unk (unknown) or . (not applicable). 
_chemical_absolute_configuration  '.' 
 
 
_refine_ls_structure_factor_coef  Fsqd 
_refine_ls_matrix_type            full
_refine_ls_hydrogen_treatment     constr         # none, undef, noref, refall,
                                                 # refxyz, refU, constr or mixed
_refine_ls_weighting_scheme       calc 
_refine_ls_weighting_details 
;
 Method, part 1, Chebychev polynomial, (Watkin, 1994, Prince, 1982) 
 [weight] = 1.0/[A~0~*T~0~(x)+A~1~*T~1~(x) ... +A~n-1~]*T~n-1~(x)] 
 where A~i~ are the Chebychev coefficients listed below and x= Fcalc/Fmax 
 Method = Robust Weighting (Prince, 1982) 
 W = [weight] * [1-(deltaF/6*sigmaF)^2^]^2^ 
 A~i~ are: 
 2.99 2.59 0.556 
;
# Insert your own references if required - in alphabetical order 
_publ_section_references 
; 
Nonius (2001). COLLECT. Nonius BV, Delft, The Netherlands. 
 
Otwinowski, Z. & Minor, W. (1997). Methods in Enzymology, Vol. 276, 
edited by C. W. Carter Jr & R. M. Sweet, pp. 307--326. 
New York: Academic Press. 
 
Betteridge, P.W., Carruthers, J.R., Cooper, R.I., 
Prout, K. & Watkin, D.J. (2003). J. Appl. Cryst. 36, 1487. 
 
Watkin, D.J., Prout, C.K. & Pearce, L.J. (1996). CAMERON, Chemical 
Crystallography Laboratory, Oxford, UK. 
 
Palatinus, L. & Chapuis, G. (2007). J. Appl. Cryst. 40, 786-790. 
 
Watkin D.J. (1994). 
Acta Cryst, A50, 411-437. 
 
Prince, E. 
Mathematical Techniques in Crystallography 
and Materials Science 
Springer-Verlag, New York, 1982. 
; 

# Uequiv = arithmetic mean of Ui i.e. Ueqiv = (U1+U2+U3)/3

# Replace last . with number of unfound hydrogen atoms attached to an atom.

# ..._refinement_flags_... 
# . no refinement constraints           S special position constraint on site
# G rigid group refinement of site      R riding atom
# D distance or angle restraint on site T thermal displacement constraints
# U Uiso or Uij restraint (rigid bond)  P partial occupancy constraint


loop_
_atom_site_label
_atom_site_type_symbol
_atom_site_fract_x
_atom_site_fract_y
_atom_site_fract_z
_atom_site_U_iso_or_equiv
_atom_site_occupancy
_atom_site_adp_type
_atom_site_refinement_flags_posn
_atom_site_refinement_flags_adp
_atom_site_refinement_flags_occupancy
_atom_site_disorder_assembly
_atom_site_disorder_group
_atom_site_attached_hydrogens
Ir1 Ir 0.97820(2) 0.756472(17) 0.233473(14) 0.0219 1.0000 Uani . . . . . . 
C2 C 1.0282(5) 0.8911(4) 0.2683(3) 0.0229 1.0000 Uani . . . . . . 
N3 N 1.1118(4) 0.9125(3) 0.2441(3) 0.0228 1.0000 Uani . . . . . . 
C4 C 1.1612(5) 1.0047(4) 0.2505(3) 0.0302 1.0000 Uani . . . . . . 
C5 C 1.2369(5) 1.0365(5) 0.3231(4) 0.0363 1.0000 Uani . . . . . . 
C6 C 1.1856(5) 1.0203(5) 0.3811(4) 0.0356 1.0000 Uani . . . . . . 
C7 C 1.0664(5) 1.0333(4) 0.3630(4) 0.0318 1.0000 Uani . . . . . . 
N8 N 1.0008(4) 0.9523(3) 0.3164(3) 0.0236 1.0000 Uani . . . . . . 
C9 C 0.8972(5) 0.9416(4) 0.3299(3) 0.0277 1.0000 Uani . . . . . . 
C10 C 0.8113(5) 0.9791(4) 0.2896(4) 0.0299 1.0000 Uani . . . . . . 
C11 C 0.8217(6) 1.0265(5) 0.2304(4) 0.0392 1.0000 Uani . . . . . . 
H11 H 1.0807 0.7340 0.3114 0.0330 1.0000 Uiso R . . . . . 
C12 C 0.7132(6) 0.9723(5) 0.3049(4) 0.0384 1.0000 Uani . . . . . . 
H12 H 0.9027 0.7608 0.2844 0.0330 1.0000 Uiso R . . . . . 
C13 C 0.6995(6) 0.9288(5) 0.3586(4) 0.0434 1.0000 Uani . . . . . . 
C14 C 0.5905(7) 0.9193(7) 0.3718(5) 0.0692 1.0000 Uani . . . . . . 
C15 C 0.7868(7) 0.8932(5) 0.3978(4) 0.0432 1.0000 Uani . . . . . . 
C16 C 0.8876(6) 0.8996(4) 0.3861(3) 0.0348 1.0000 Uani . . . . . . 
C17 C 0.9804(7) 0.8629(5) 0.4322(4) 0.0486 1.0000 Uani . . . . . . 
C18 C 1.1285(5) 0.8429(4) 0.1885(3) 0.0248 1.0000 Uani . . . . . . 
C19 C 1.0753(5) 0.8490(4) 0.1189(3) 0.0270 1.0000 Uani . . . . . . 
C20 C 0.9972(5) 0.9191(4) 0.1016(4) 0.0360 1.0000 Uani . . . . . . 
C21 C 1.1004(5) 0.7899(4) 0.0644(4) 0.0311 1.0000 Uani . . . . . . 
C22 C 1.1768(5) 0.7268(4) 0.0778(3) 0.0306 1.0000 Uani . . . . . . 
C23 C 1.2283(5) 0.7234(4) 0.1469(4) 0.0323 1.0000 Uani . . . . . . 
C24 C 1.2064(5) 0.7810(4) 0.2040(3) 0.0274 1.0000 Uani . . . . . . 
C25 C 1.2720(5) 0.7796(5) 0.2782(4) 0.0352 1.0000 Uani . . . . . . 
C26 C 1.2033(6) 0.6660(5) 0.0172(4) 0.0444 1.0000 Uani . . . . . . 
C27 C 0.9329(5) 0.6210(4) 0.2082(3) 0.0219 1.0000 Uani . . . . . . 
N28 N 0.9756(4) 0.5505(3) 0.2373(3) 0.0262 1.0000 Uani . . . . . . 
C29 C 1.0698(5) 0.5635(4) 0.2958(3) 0.0257 1.0000 Uani . . . . . . 
C30 C 1.0596(5) 0.5856(4) 0.3644(3) 0.0303 1.0000 Uani . . . . . . 
C31 C 0.9527(6) 0.6006(5) 0.3793(4) 0.0418 1.0000 Uani . . . . . . 
C32 C 1.1514(6) 0.5905(5) 0.4198(4) 0.0382 1.0000 Uani . . . . . . 
C33 C 1.2499(6) 0.5729(4) 0.4088(4) 0.0384 1.0000 Uani . . . . . . 
C34 C 1.3479(6) 0.5748(6) 0.4695(5) 0.0545 1.0000 Uani . . . . . . 
C35 C 1.2566(5) 0.5501(4) 0.3397(4) 0.0364 1.0000 Uani . . . . . . 
C36 C 1.1682(5) 0.5452(4) 0.2823(4) 0.0301 1.0000 Uani . . . . . . 
C37 C 1.1802(6) 0.5192(5) 0.2088(4) 0.0401 1.0000 Uani . . . . . . 
C38 C 0.9432(5) 0.4550(4) 0.2032(4) 0.0327 1.0000 Uani . . . . . . 
C39 C 0.8425(6) 0.4185(4) 0.2174(4) 0.0365 1.0000 Uani . . . . . . 
C40 C 0.7537(5) 0.4826(5) 0.2000(4) 0.0379 1.0000 Uani . . . . . . 
H41 H 1.1053 1.0470 0.2422 0.0360 1.0000 Uiso R . . . . . 
C41 C 0.7575(5) 0.5282(4) 0.1379(4) 0.0318 1.0000 Uani . . . . . . 
H42 H 1.2006 1.0026 0.2150 0.0357 1.0000 Uiso R . . . . . 
N42 N 0.8406(4) 0.6034(3) 0.1559(3) 0.0253 1.0000 Uani . . . . . . 
C43 C 0.8161(5) 0.6783(4) 0.1190(3) 0.0254 1.0000 Uani . . . . . . 
C44 C 0.8509(5) 0.6782(4) 0.0577(3) 0.0271 1.0000 Uani . . . . . . 
C45 C 0.9227(5) 0.6074(5) 0.0376(4) 0.0353 1.0000 Uani . . . . . . 
C46 C 0.8175(5) 0.7445(4) 0.0168(4) 0.0332 1.0000 Uani . . . . . . 
C47 C 0.7507(5) 0.8094(4) 0.0344(4) 0.0327 1.0000 Uani . . . . . . 
C48 C 0.7170(5) 0.8084(4) 0.0945(4) 0.0353 1.0000 Uani . . . . . . 
C49 C 0.7471(5) 0.7431(4) 0.1376(4) 0.0304 1.0000 Uani . . . . . . 
C50 C 0.6947(5) 0.7388(5) 0.1966(4) 0.0352 1.0000 Uani . . . . . . 
H51 H 1.3017 1.0047 0.3270 0.0442 1.0000 Uiso R . . . . . 
C51 C 0.7155(6) 0.8792(5) -0.0123(4) 0.0470 1.0000 Uani . . . . . . 
H52 H 1.2548 1.1014 0.3282 0.0441 1.0000 Uiso R . . . . . 
C54 C 0.4154(4) 0.3840(3) 0.6544(2) 0.0573 1.0000 Uani D . . . . . 
C59 C 0.4665(5) 0.4610(4) 0.7113(4) 0.0297 1.0000 Uani . . . . . . 
C60 C 0.4780(5) 0.5479(4) 0.6964(3) 0.0254 1.0000 Uani . . . . . . 
H61 H 1.2204 1.0631 0.4239 0.0431 1.0000 Uiso R . . . . . 
C61 C 0.5246(4) 0.6216(4) 0.7490(3) 0.0224 1.0000 Uani . . . . . . 
H62 H 1.1957 0.9587 0.3893 0.0427 1.0000 Uiso R . . . . . 
C62 C 0.5588(5) 0.6028(4) 0.8171(3) 0.0253 1.0000 Uani . . . . . . 
C63 C 0.5458(5) 0.5174(4) 0.8332(3) 0.0283 1.0000 Uani . . . . . . 
C64 C 0.5010(5) 0.4452(4) 0.7800(4) 0.0304 1.0000 Uani . . . . . . 
C65 C 0.5793(6) 0.5051(5) 0.9078(4) 0.0422 1.0000 Uani . . . . . . 
F66 F 0.5568(4) 0.4219(3) 0.9178(3) 0.0629 1.0000 Uani . . . . . . 
F67 F 0.6832(4) 0.5238(4) 0.9365(3) 0.0774 1.0000 Uani . . . . . . 
F68 F 0.5296(6) 0.5599(4) 0.9475(3) 0.0973 1.0000 Uani . . . . . . 
B69 B 0.5429(5) 0.7235(5) 0.7312(3) 0.0215 1.0000 Uani . . . . . . 
C70 C 0.6649(4) 0.7282(4) 0.7233(3) 0.0212 1.0000 Uani . . . . . . 
H71 H 1.0443 1.0433 0.4068 0.0382 1.0000 Uiso R . . . . . 
C71 C 0.7514(5) 0.7567(4) 0.7814(3) 0.0227 1.0000 Uani . . . . . . 
H72 H 1.0520 1.0860 0.3395 0.0379 1.0000 Uiso R . . . . . 
C72 C 0.8567(4) 0.7583(4) 0.7772(3) 0.0242 1.0000 Uani . . . . . . 
C73 C 0.8793(5) 0.7309(4) 0.7125(3) 0.0257 1.0000 Uani . . . . . . 
C74 C 0.7949(5) 0.7004(4) 0.6539(3) 0.0232 1.0000 Uani . . . . . . 
C75 C 0.6900(5) 0.6975(4) 0.6599(3) 0.0261 1.0000 Uani . . . . . . 
C76 C 0.8186(5) 0.6761(5) 0.5845(3) 0.0331 1.0000 Uani . . . . . . 
F77 F 0.9053(3) 0.6294(3) 0.5869(2) 0.0538 1.0000 Uani . . . . . . 
F78 F 0.7403(3) 0.6275(3) 0.5356(2) 0.0540 1.0000 Uani . . . . . . 
F79 F 0.8390(4) 0.7516(3) 0.5587(2) 0.0585 1.0000 Uani . . . . . . 
C80 C 0.9445(5) 0.7858(5) 0.8418(4) 0.0313 1.0000 Uani . . . . . . 
F81 F 0.9694(4) 0.7182(3) 0.8789(2) 0.0478 1.0000 Uani . . . . . . 
F82 F 1.0345(3) 0.8139(4) 0.8293(2) 0.0683 1.0000 Uani . . . . . . 
F83 F 0.9211(3) 0.8530(3) 0.8878(2) 0.0435 1.0000 Uani . . . . . . 
C84 C 0.4533(5) 0.7432(4) 0.6628(3) 0.0220 1.0000 Uani . . . . . . 
C85 C 0.4728(5) 0.7899(4) 0.6113(3) 0.0231 1.0000 Uani . . . . . . 
C86 C 0.3916(5) 0.8164(4) 0.5599(3) 0.0282 1.0000 Uani . . . . . . 
C87 C 0.4192(6) 0.8596(5) 0.5038(4) 0.0409 1.0000 Uani . . . . . . 
F88 F 0.5127(3) 0.9084(3) 0.5264(2) 0.0511 1.0000 Uani . . . . . . 
F89 F 0.4271(5) 0.7989(4) 0.4487(3) 0.0844 1.0000 Uani . . . . . . 
F90 F 0.3487(4) 0.9164(4) 0.4786(3) 0.0801 1.0000 Uani . . . . . . 
C91 C 0.2865(5) 0.7973(4) 0.5569(3) 0.0313 1.0000 Uani . . . . . . 
C92 C 0.2638(5) 0.7517(4) 0.6077(3) 0.0292 1.0000 Uani . . . . . . 
C93 C 0.3445(5) 0.7241(4) 0.6583(3) 0.0261 1.0000 Uani . . . . . . 
C94 C 0.1524(2) 0.7294(3) 0.6091(2) 0.0433 1.0000 Uani D . . . . . 
C98 C 0.5256(4) 0.8045(4) 0.7927(3) 0.0210 1.0000 Uani . . . . . . 
C99 C 0.5646(4) 0.8937(4) 0.7975(3) 0.0222 1.0000 Uani . . . . . . 
C100 C 0.5389(5) 0.9657(4) 0.8417(3) 0.0243 1.0000 Uani . . . . . . 
C101 C 0.4718(5) 0.9516(4) 0.8844(3) 0.0273 1.0000 Uani . . . . . . 
C102 C 0.4317(5) 0.8637(4) 0.8802(3) 0.0248 1.0000 Uani . . . . . . 
C103 C 0.4575(5) 0.7925(4) 0.8356(3) 0.0238 1.0000 Uani . . . . . . 
C104 C 0.3615(4) 0.8434(3) 0.9258(2) 0.0533 1.0000 Uani D . . . . . 
H111 H 0.8872 1.0648 0.2447 0.0592 1.0000 Uiso R . . . . . 
C111 C 0.5869(6) 1.0589(5) 0.8460(4) 0.0344 1.0000 Uani . . . . . . 
H112 H 0.7626 1.0637 0.2179 0.0591 1.0000 Uiso R . . . . . 
F112 F 0.5951(4) 1.0741(3) 0.7828(2) 0.0553 1.0000 Uani . . . . . . 
H113 H 0.8231 0.9825 0.1898 0.0592 1.0000 Uiso R . . . . . 
F113 F 0.5313(4) 1.1252(3) 0.8702(3) 0.0560 1.0000 Uani . . . . . . 
F114 F 0.6852(3) 1.0719(3) 0.8874(3) 0.0546 1.0000 Uani . . . . . . 
H121 H 0.6551 0.9979 0.2782 0.0460 1.0000 Uiso R . . . . . 
H141 H 0.5545 0.9742 0.3661 0.1040 1.0000 Uiso R . . . . . 
H142 H 0.5988 0.9079 0.4187 0.1040 1.0000 Uiso R . . . . . 
H143 H 0.5492 0.8690 0.3388 0.1040 1.0000 Uiso R . . . . . 
H151 H 0.7789 0.8633 0.4339 0.0519 1.0000 Uiso R . . . . . 
H171 H 1.0278 0.9125 0.4622 0.0730 1.0000 Uiso R . . . . . 
H172 H 0.9557 0.8254 0.4609 0.0731 1.0000 Uiso R . . . . . 
H173 H 1.0184 0.8266 0.4031 0.0730 1.0000 Uiso R . . . . . 
H201 H 1.0328 0.9790 0.1158 0.0542 1.0000 Uiso R . . . . . 
H202 H 0.9425 0.9150 0.1260 0.0539 1.0000 Uiso R . . . . . 
H203 H 0.9644 0.9092 0.0514 0.0543 1.0000 Uiso R . . . . . 
H211 H 1.0655 0.7933 0.0177 0.0371 1.0000 Uiso R . . . . . 
H231 H 1.2792 0.6813 0.1562 0.0393 1.0000 Uiso R . . . . . 
H251 H 1.2760 0.7180 0.2867 0.0534 1.0000 Uiso R . . . . . 
H252 H 1.2391 0.8138 0.3111 0.0534 1.0000 Uiso R . . . . . 
H253 H 1.3424 0.8063 0.2852 0.0533 1.0000 Uiso R . . . . . 
H261 H 1.2782 0.6746 0.0204 0.0672 1.0000 Uiso R . . . . . 
H262 H 1.1622 0.6797 -0.0270 0.0673 1.0000 Uiso R . . . . . 
H263 H 1.1871 0.6036 0.0189 0.0672 1.0000 Uiso R . . . . . 
H311 H 0.9066 0.5454 0.3629 0.0629 1.0000 Uiso R . . . . . 
H312 H 0.9628 0.6190 0.4294 0.0631 1.0000 Uiso R . . . . . 
H313 H 0.9197 0.6481 0.3550 0.0631 1.0000 Uiso R . . . . . 
H321 H 1.1460 0.6063 0.4661 0.0461 1.0000 Uiso R . . . . . 
H341 H 1.3878 0.5232 0.4594 0.0822 1.0000 Uiso R . . . . . 
H342 H 1.3269 0.5715 0.5117 0.0821 1.0000 Uiso R . . . . . 
H343 H 1.3918 0.6295 0.4759 0.0822 1.0000 Uiso R . . . . . 
H351 H 1.3226 0.5381 0.3317 0.0440 1.0000 Uiso R . . . . . 
H371 H 1.2528 0.5325 0.2088 0.0601 1.0000 Uiso R . . . . . 
H372 H 1.1349 0.5534 0.1776 0.0601 1.0000 Uiso R . . . . . 
H373 H 1.1621 0.4551 0.1914 0.0601 1.0000 Uiso R . . . . . 
H381 H 0.9316 0.4505 0.1524 0.0389 1.0000 Uiso R . . . . . 
H382 H 1.0006 0.4177 0.2218 0.0391 1.0000 Uiso R . . . . . 
H391 H 0.8201 0.3596 0.1872 0.0442 1.0000 Uiso R . . . . . 
H392 H 0.8561 0.4114 0.2664 0.0439 1.0000 Uiso R . . . . . 
F400 F 0.4194(11) 0.3018(4) 0.6723(5) 0.0750 0.553(16) Uani D . P 2 1 . 
F401 F 0.4536(8) 0.3776(7) 0.5981(4) 0.0594 0.553(16) Uani D . P 2 1 . 
H401 H 0.7597 0.5297 0.2410 0.0449 1.0000 Uiso R . . . . . 
F402 F 0.3118(5) 0.3975(8) 0.6317(6) 0.0674 0.553(16) Uani D . P 2 1 . 
H402 H 0.6856 0.4477 0.1889 0.0449 1.0000 Uiso R . . . . . 
F403 F 0.4729(11) 0.3117(6) 0.6634(6) 0.0695 0.447(16) Uani D . P 2 2 . 
F404 F 0.4137(12) 0.3998(8) 0.5902(4) 0.0586 0.447(16) Uani D . P 2 2 . 
F405 F 0.3164(7) 0.3567(10) 0.6512(6) 0.0663 0.447(16) Uani D . P 2 2 . 
H411 H 0.6884 0.5530 0.1209 0.0379 1.0000 Uiso R . . . . . 
H412 H 0.7712 0.4834 0.1003 0.0379 1.0000 Uiso R . . . . . 
H451 H 0.9354 0.6135 -0.0068 0.0530 1.0000 Uiso R . . . . . 
H452 H 0.9892 0.6141 0.0732 0.0531 1.0000 Uiso R . . . . . 
H453 H 0.8893 0.5478 0.0337 0.0530 1.0000 Uiso R . . . . . 
H461 H 0.8408 0.7450 -0.0238 0.0400 1.0000 Uiso R . . . . . 
H481 H 0.6721 0.8523 0.1069 0.0419 1.0000 Uiso R . . . . . 
F500 F 0.4161(9) 0.8434(10) 0.9918(4) 0.0633 0.330(8) Uani D . P 1 1 . 
F501 F 0.3033(10) 0.7650(6) 0.9045(7) 0.0584 0.330(8) Uani D . P 1 1 . 
H501 H 0.7068 0.7971 0.2278 0.0532 1.0000 Uiso R . . . . . 
F502 F 0.2930(10) 0.9082(7) 0.9283(8) 0.0601 0.330(8) Uani D . P 1 1 . 
H502 H 0.7250 0.6921 0.2228 0.0532 1.0000 Uiso R . . . . . 
F503 F 0.3998(5) 0.7811(5) 0.9646(4) 0.0651 0.670(8) Uani D . P 1 2 . 
H503 H 0.6188 0.7251 0.1773 0.0531 1.0000 Uiso R . . . . . 
F504 F 0.2652(5) 0.8106(5) 0.8869(3) 0.0631 0.670(8) Uani D . P 1 2 . 
F505 F 0.3473(6) 0.9150(4) 0.9703(4) 0.0657 0.670(8) Uani D . P 1 2 . 
H511 H 0.6932 0.8502 -0.0611 0.0712 1.0000 Uiso R . . . . . 
H512 H 0.6564 0.9090 -0.0001 0.0713 1.0000 Uiso R . . . . . 
H513 H 0.7734 0.9233 -0.0062 0.0713 1.0000 Uiso R . . . . . 
F600 F 0.0801(6) 0.7473(12) 0.5516(6) 0.0507 0.56(4) Uani D . P 3 1 . 
F601 F 0.1224(11) 0.7722(9) 0.6653(6) 0.0502 0.56(4) Uani D . P 3 1 . 
H601 H 0.4540 0.5570 0.6495 0.0312 1.0000 Uiso R . . . . . 
F602 F 0.1370(9) 0.6396(4) 0.6087(9) 0.0457 0.56(4) Uani D . P 3 1 . 
F603 F 0.0795(8) 0.7756(13) 0.5698(10) 0.0523 0.44(4) Uani D . P 3 2 . 
F604 F 0.1447(12) 0.7527(12) 0.6763(4) 0.0412 0.44(4) Uani D . P 3 2 . 
F605 F 0.1176(14) 0.6413(5) 0.5889(9) 0.0446 0.44(4) Uani D . P 3 2 . 
H621 H 0.5912 0.6495 0.8532 0.0297 1.0000 Uiso R . . . . . 
H641 H 0.4940 0.3872 0.7902 0.0369 1.0000 Uiso R . . . . . 
H711 H 0.7386 0.7761 0.8255 0.0270 1.0000 Uiso R . . . . . 
H731 H 0.9489 0.7327 0.7084 0.0311 1.0000 Uiso R . . . . . 
H751 H 0.6360 0.6742 0.6200 0.0311 1.0000 Uiso R . . . . . 
H851 H 0.5432 0.8044 0.6117 0.0283 1.0000 Uiso R . . . . . 
H911 H 0.2321 0.8144 0.5226 0.0381 1.0000 Uiso R . . . . . 
H931 H 0.3268 0.6916 0.6907 0.0309 1.0000 Uiso R . . . . . 
H991 H 0.6102 0.9051 0.7698 0.0274 1.0000 Uiso R . . . . . 
H1011 H 0.4550 1.0001 0.9148 0.0329 1.0000 Uiso R . . . . . 
H1031 H 0.4291 0.7339 0.8338 0.0290 1.0000 Uiso R . . . . . 
loop_
_atom_site_aniso_label
_atom_site_aniso_U_11
_atom_site_aniso_U_22
_atom_site_aniso_U_33
_atom_site_aniso_U_23
_atom_site_aniso_U_13
_atom_site_aniso_U_12
Ir1 0.02337(11) 0.01814(10) 0.02431(11) 0.00419(8) 0.00626(8) 0.00133(8) 
C2 0.025(3) 0.021(3) 0.023(3) 0.010(2) 0.003(2) 0.000(2) 
N3 0.025(3) 0.016(2) 0.025(3) -0.0032(19) 0.007(2) -0.0017(19) 
C4 0.037(4) 0.016(3) 0.038(4) 0.001(3) 0.013(3) -0.006(3) 
C5 0.023(3) 0.033(4) 0.047(4) 0.002(3) 0.004(3) -0.001(3) 
C6 0.034(4) 0.030(3) 0.035(4) 0.001(3) -0.003(3) 0.001(3) 
C7 0.034(4) 0.022(3) 0.035(4) 0.000(3) 0.004(3) 0.000(3) 
N8 0.026(3) 0.019(2) 0.026(3) -0.001(2) 0.008(2) 0.0022(19) 
C9 0.032(3) 0.025(3) 0.029(3) 0.006(3) 0.012(3) 0.000(3) 
C10 0.032(3) 0.026(3) 0.034(4) 0.004(3) 0.013(3) 0.002(3) 
C11 0.041(4) 0.043(4) 0.038(4) 0.016(3) 0.014(3) 0.013(3) 
C12 0.033(4) 0.037(4) 0.044(4) -0.001(3) 0.014(3) 0.006(3) 
C13 0.043(4) 0.038(4) 0.054(5) -0.002(3) 0.030(4) -0.002(3) 
C14 0.059(6) 0.077(7) 0.087(7) 0.004(5) 0.052(6) -0.002(5) 
C15 0.064(5) 0.037(4) 0.038(4) 0.004(3) 0.032(4) -0.006(4) 
C16 0.052(4) 0.027(3) 0.028(3) 0.006(3) 0.016(3) 0.001(3) 
C17 0.072(6) 0.042(4) 0.034(4) 0.015(3) 0.013(4) 0.011(4) 
C18 0.029(3) 0.017(3) 0.028(3) -0.001(2) 0.010(3) 0.002(2) 
C19 0.025(3) 0.022(3) 0.032(3) 0.006(3) 0.003(3) 0.001(2) 
C20 0.033(4) 0.027(3) 0.042(4) 0.003(3) 0.000(3) 0.003(3) 
C21 0.028(3) 0.029(3) 0.032(3) 0.000(3) 0.005(3) -0.001(3) 
C22 0.028(3) 0.031(3) 0.033(3) 0.001(3) 0.010(3) 0.000(3) 
C23 0.031(3) 0.027(3) 0.042(4) 0.004(3) 0.018(3) 0.003(3) 
C24 0.022(3) 0.025(3) 0.036(4) 0.007(3) 0.008(3) 0.000(2) 
C25 0.031(4) 0.033(4) 0.040(4) 0.013(3) 0.004(3) 0.002(3) 
C26 0.049(5) 0.039(4) 0.048(5) -0.003(3) 0.024(4) 0.001(3) 
C27 0.024(3) 0.021(3) 0.023(3) 0.008(2) 0.009(2) 0.005(2) 
N28 0.024(3) 0.018(2) 0.034(3) 0.001(2) 0.005(2) 0.002(2) 
C29 0.022(3) 0.022(3) 0.033(3) 0.005(2) 0.007(3) 0.000(2) 
C30 0.031(3) 0.027(3) 0.032(3) 0.006(3) 0.006(3) 0.001(3) 
C31 0.042(4) 0.049(4) 0.037(4) 0.006(3) 0.015(3) 0.005(3) 
C32 0.043(4) 0.034(4) 0.031(4) 0.004(3) 0.001(3) -0.004(3) 
C33 0.034(4) 0.028(3) 0.045(4) 0.008(3) -0.006(3) 0.000(3) 
C34 0.039(4) 0.046(5) 0.062(5) 0.009(4) -0.014(4) 0.000(4) 
C35 0.027(3) 0.030(3) 0.052(4) 0.012(3) 0.008(3) 0.003(3) 
C36 0.028(3) 0.025(3) 0.038(4) 0.003(3) 0.011(3) 0.001(3) 
C37 0.037(4) 0.041(4) 0.047(4) 0.004(3) 0.023(3) 0.001(3) 
C38 0.041(4) 0.022(3) 0.034(4) 0.004(3) 0.008(3) 0.002(3) 
C39 0.042(4) 0.027(3) 0.042(4) 0.010(3) 0.011(3) -0.007(3) 
C40 0.031(4) 0.026(3) 0.059(5) 0.012(3) 0.014(3) -0.006(3) 
C41 0.028(3) 0.024(3) 0.039(4) 0.003(3) 0.003(3) -0.006(3) 
N42 0.024(3) 0.018(2) 0.031(3) 0.006(2) 0.002(2) -0.0031(19) 
C43 0.026(3) 0.017(3) 0.032(3) 0.002(2) 0.007(3) -0.001(2) 
C44 0.024(3) 0.026(3) 0.031(3) 0.006(3) 0.007(3) 0.001(2) 
C45 0.034(4) 0.034(4) 0.039(4) 0.002(3) 0.015(3) 0.001(3) 
C46 0.032(4) 0.033(3) 0.031(3) 0.002(3) 0.004(3) -0.001(3) 
C47 0.026(3) 0.028(3) 0.042(4) 0.008(3) 0.004(3) 0.001(3) 
C48 0.029(3) 0.031(3) 0.047(4) 0.008(3) 0.011(3) 0.009(3) 
C49 0.026(3) 0.028(3) 0.039(4) 0.010(3) 0.009(3) -0.001(3) 
C50 0.033(4) 0.029(3) 0.047(4) 0.005(3) 0.018(3) 0.006(3) 
C51 0.046(4) 0.048(4) 0.047(5) 0.026(4) 0.003(4) 0.012(4) 
C54 0.064(3) 0.036(3) 0.069(3) -0.012(2) 0.026(3) -0.014(2) 
C59 0.027(3) 0.025(3) 0.038(4) 0.005(3) 0.011(3) -0.001(3) 
C60 0.021(3) 0.032(3) 0.027(3) 0.007(3) 0.013(2) 0.004(2) 
C61 0.014(3) 0.027(3) 0.027(3) 0.005(2) 0.007(2) 0.003(2) 
C62 0.020(3) 0.033(3) 0.021(3) 0.005(2) 0.003(2) -0.002(2) 
C63 0.029(3) 0.030(3) 0.031(3) 0.012(3) 0.011(3) 0.005(3) 
C64 0.031(3) 0.024(3) 0.041(4) 0.012(3) 0.013(3) 0.004(3) 
C65 0.053(5) 0.036(4) 0.039(4) 0.017(3) 0.010(4) 0.002(3) 
F66 0.068(3) 0.056(3) 0.067(3) 0.045(3) 0.001(3) -0.008(2) 
F67 0.069(4) 0.089(4) 0.059(3) 0.044(3) -0.025(3) -0.029(3) 
F68 0.177(7) 0.096(5) 0.041(3) 0.034(3) 0.052(4) 0.058(5) 
B69 0.015(3) 0.031(4) 0.021(3) 0.010(3) 0.007(2) -0.002(3) 
C70 0.021(3) 0.019(3) 0.025(3) 0.008(2) 0.007(2) 0.000(2) 
C71 0.023(3) 0.021(3) 0.025(3) 0.006(2) 0.006(2) 0.005(2) 
C72 0.017(3) 0.025(3) 0.030(3) 0.009(2) 0.003(2) 0.001(2) 
C73 0.021(3) 0.028(3) 0.032(3) 0.008(3) 0.010(2) 0.003(2) 
C74 0.023(3) 0.020(3) 0.029(3) 0.006(2) 0.010(2) -0.003(2) 
C75 0.020(3) 0.030(3) 0.028(3) 0.003(3) 0.007(2) -0.002(2) 
C76 0.035(4) 0.036(4) 0.031(3) -0.001(3) 0.017(3) -0.002(3) 
F77 0.043(3) 0.064(3) 0.058(3) -0.002(2) 0.026(2) 0.016(2) 
F78 0.043(3) 0.078(3) 0.033(2) -0.015(2) 0.0126(19) -0.015(2) 
F79 0.096(4) 0.046(3) 0.048(3) 0.012(2) 0.043(3) -0.001(3) 
C80 0.024(3) 0.035(3) 0.035(4) 0.009(3) 0.007(3) 0.003(3) 
F81 0.063(3) 0.039(2) 0.032(2) 0.0076(18) -0.008(2) 0.017(2) 
F82 0.026(2) 0.128(5) 0.046(3) 0.017(3) 0.002(2) -0.028(3) 
F83 0.040(2) 0.033(2) 0.045(2) -0.0051(18) -0.0045(19) 0.0038(18) 
C84 0.021(3) 0.021(3) 0.026(3) 0.005(2) 0.009(2) 0.002(2) 
C85 0.020(3) 0.025(3) 0.023(3) 0.008(2) 0.002(2) -0.003(2) 
C86 0.031(3) 0.031(3) 0.025(3) 0.011(3) 0.007(3) 0.004(3) 
C87 0.039(4) 0.044(4) 0.042(4) 0.021(3) 0.008(3) 0.001(3) 
F88 0.044(3) 0.062(3) 0.054(3) 0.034(2) 0.012(2) -0.008(2) 
F89 0.151(6) 0.072(4) 0.041(3) 0.007(3) 0.048(3) -0.026(4) 
F90 0.049(3) 0.105(4) 0.103(4) 0.085(4) 0.006(3) 0.012(3) 
C91 0.023(3) 0.041(4) 0.028(3) 0.013(3) -0.001(3) 0.004(3) 
C92 0.024(3) 0.037(3) 0.027(3) 0.009(3) 0.004(3) 0.003(3) 
C93 0.021(3) 0.033(3) 0.027(3) 0.013(3) 0.007(2) 0.006(2) 
C94 0.018(2) 0.068(3) 0.044(3) 0.017(2) 0.004(2) 0.009(2) 
C98 0.016(3) 0.027(3) 0.021(3) 0.006(2) 0.005(2) 0.006(2) 
C99 0.018(3) 0.028(3) 0.022(3) 0.009(2) 0.006(2) 0.004(2) 
C100 0.019(3) 0.027(3) 0.027(3) 0.008(2) 0.003(2) -0.001(2) 
C101 0.027(3) 0.025(3) 0.028(3) 0.002(2) 0.006(3) 0.000(2) 
C102 0.022(3) 0.029(3) 0.026(3) 0.008(2) 0.008(2) 0.001(2) 
C103 0.024(3) 0.022(3) 0.027(3) 0.004(2) 0.010(2) -0.003(2) 
C104 0.064(3) 0.057(3) 0.052(3) 0.009(2) 0.043(3) -0.007(3) 
C111 0.038(4) 0.030(3) 0.039(4) 0.008(3) 0.016(3) 0.006(3) 
F112 0.091(4) 0.037(2) 0.042(3) 0.013(2) 0.022(2) -0.014(2) 
F113 0.059(3) 0.028(2) 0.095(4) 0.010(2) 0.045(3) 0.008(2) 
F114 0.041(3) 0.043(3) 0.072(3) 0.005(2) 0.006(2) -0.018(2) 
F400 0.094(6) 0.036(3) 0.084(5) -0.003(4) 0.016(5) -0.030(4) 
F401 0.059(5) 0.051(5) 0.064(4) -0.023(4) 0.029(4) -0.004(4) 
F402 0.059(4) 0.048(5) 0.081(5) -0.026(4) 0.019(4) -0.022(4) 
F403 0.070(6) 0.039(4) 0.085(5) -0.013(4) 0.012(5) -0.005(4) 
F404 0.072(6) 0.040(5) 0.059(4) -0.012(4) 0.023(5) -0.010(4) 
F405 0.064(4) 0.046(5) 0.081(5) -0.020(4) 0.029(4) -0.034(4) 
F500 0.074(6) 0.076(6) 0.050(5) 0.009(5) 0.038(4) -0.010(5) 
F501 0.071(6) 0.057(5) 0.061(5) 0.000(5) 0.051(5) -0.017(4) 
F502 0.068(6) 0.066(5) 0.061(6) 0.010(5) 0.044(5) 0.004(4) 
F503 0.082(4) 0.070(4) 0.065(4) 0.031(3) 0.046(3) 0.009(4) 
F504 0.053(4) 0.085(5) 0.060(4) 0.013(4) 0.032(3) -0.018(3) 
F505 0.092(5) 0.060(4) 0.058(4) -0.012(3) 0.058(4) -0.015(3) 
F600 0.023(3) 0.075(5) 0.050(4) 0.018(4) -0.002(3) 0.009(3) 
F601 0.018(4) 0.074(5) 0.058(4) 0.006(4) 0.010(3) 0.018(3) 
F602 0.018(4) 0.063(4) 0.046(5) 0.017(3) -0.012(4) -0.006(3) 
F603 0.022(4) 0.084(5) 0.054(5) 0.028(4) 0.006(4) 0.016(4) 
F604 0.014(4) 0.068(5) 0.045(4) 0.015(4) 0.009(3) 0.021(4) 
F605 0.015(5) 0.072(4) 0.041(5) 0.013(4) -0.004(4) -0.007(4) 

_refine_ls_extinction_method 
    'None'
_oxford_refine_ls_scale 0.087626(12) 
loop_
 _geom_bond_atom_site_label_1
 _geom_bond_site_symmetry_1
 _geom_bond_atom_site_label_2
 _geom_bond_site_symmetry_2
 _geom_bond_distance
 _geom_bond_publ_flag
Ir1 . C2 . 2.053(6)    yes
Ir1 . H11 . 1.854    no
Ir1 . H12 . 1.580    no
Ir1 . C27 . 2.041(6)    yes
C2 . N3 . 1.351(7)    yes
C2 . N8 . 1.339(7)    yes
N3 . C4 . 1.481(7)    yes
N3 . C18 . 1.455(7)    yes
C4 . C5 . 1.523(9)    yes
C4 . H41 . 0.976    no
C4 . H42 . 0.971    no
C5 . C6 . 1.524(10)    yes
C5 . H51 . 0.971    no
C5 . H52 . 0.975    no
C6 . C7 . 1.527(9)    yes
C6 . H61 . 0.978    no
C6 . H62 . 0.967    no
C7 . N8 . 1.497(7)    yes
C7 . H71 . 0.978    no
C7 . H72 . 0.978    no
N8 . C9 . 1.452(8)    yes
C9 . C10 . 1.389(9)    yes
C9 . C16 . 1.401(8)    yes
C10 . C11 . 1.504(9)    yes
C10 . C12 . 1.394(9)    yes
C11 . H111 . 0.968    no
C11 . H112 . 0.965    no
C11 . H113 . 0.961    no
C12 . C13 . 1.384(10)    yes
C12 . H121 . 0.936    no
C13 . C14 . 1.517(10)    yes
C13 . C15 . 1.378(11)    yes
C14 . H141 . 0.965    no
C14 . H142 . 0.958    no
C14 . H143 . 0.963    no
C15 . C16 . 1.395(10)    yes
C15 . H151 . 0.932    no
C16 . C17 . 1.495(10)    yes
C17 . H171 . 0.967    no
C17 . H172 . 0.966    no
C17 . H173 . 0.968    no
C18 . C19 . 1.402(8)    yes
C18 . C24 . 1.401(8)    yes
C19 . C20 . 1.497(8)    yes
C19 . C21 . 1.399(9)    yes
C20 . H201 . 0.963    no
C20 . H202 . 0.966    no
C20 . H203 . 0.968    no
C21 . C22 . 1.394(9)    yes
C21 . H211 . 0.938    no
C22 . C23 . 1.379(9)    yes
C22 . C26 . 1.510(9)    yes
C23 . C24 . 1.407(9)    yes
C23 . H231 . 0.930    no
C24 . C25 . 1.511(9)    yes
C25 . H251 . 0.963    no
C25 . H252 . 0.960    no
C25 . H253 . 0.959    no
C26 . H261 . 0.965    no
C26 . H262 . 0.963    no
C26 . H263 . 0.960    no
C27 . N28 . 1.349(7)    yes
C27 . N42 . 1.363(7)    yes
N28 . C29 . 1.444(7)    yes
N28 . C38 . 1.481(7)    yes
C29 . C30 . 1.396(9)    yes
C29 . C36 . 1.400(8)    yes
C30 . C31 . 1.511(9)    yes
C30 . C32 . 1.396(9)    yes
C31 . H311 . 0.967    no
C31 . H312 . 0.966    no
C31 . H313 . 0.972    no
C32 . C33 . 1.381(10)    yes
C32 . H321 . 0.936    no
C33 . C34 . 1.514(9)    yes
C33 . C35 . 1.390(10)    yes
C34 . H341 . 0.963    no
C34 . H342 . 0.957    no
C34 . H343 . 0.960    no
C35 . C36 . 1.392(9)    yes
C35 . H351 . 0.932    no
C36 . C37 . 1.504(9)    yes
C37 . H371 . 0.962    no
C37 . H372 . 0.962    no
C37 . H373 . 0.965    no
C38 . C39 . 1.519(9)    yes
C38 . H381 . 0.976    no
C38 . H382 . 0.976    no
C39 . C40 . 1.527(9)    yes
C39 . H391 . 0.975    no
C39 . H392 . 0.971    no
C40 . C41 . 1.519(9)    yes
C40 . H401 . 0.974    no
C40 . H402 . 0.974    no
C41 . N42 . 1.476(7)    yes
C41 . H411 . 0.982    no
C41 . H412 . 0.976    no
N42 . C43 . 1.436(7)    yes
C43 . C44 . 1.408(8)    yes
C43 . C49 . 1.408(8)    yes
C44 . C45 . 1.504(9)    yes
C44 . C46 . 1.392(9)    yes
C45 . H451 . 0.959    no
C45 . H452 . 0.961    no
C45 . H453 . 0.965    no
C46 . C47 . 1.382(9)    yes
C46 . H461 . 0.935    no
C47 . C48 . 1.379(9)    yes
C47 . C51 . 1.513(9)    yes
C48 . C49 . 1.401(9)    yes
C48 . H481 . 0.935    no
C49 . C50 . 1.512(9)    yes
C50 . H501 . 0.969    no
C50 . H502 . 0.970    no
C50 . H503 . 0.969    no
C51 . H511 . 0.965    no
C51 . H512 . 0.962    no
C51 . H513 . 0.961    no
C54 . C59 . 1.486(7)    yes
C54 . F400 . 1.334(5)    yes
C54 . F401 . 1.329(5)    yes
C54 . F402 . 1.341(5)    yes
C54 . C59 . 1.486(7)    yes
C54 . F403 . 1.341(5)    yes
C54 . F404 . 1.332(5)    yes
C54 . F405 . 1.326(5)    yes
C59 . C60 . 1.393(8)    yes
C59 . C64 . 1.389(9)    yes
C60 . C61 . 1.397(8)    yes
C60 . H601 . 0.940    no
C61 . C62 . 1.393(8)    yes
C61 . B69 . 1.646(9)    yes
C62 . C63 . 1.383(8)    yes
C62 . H621 . 0.922    no
C63 . C64 . 1.384(9)    yes
C63 . C65 . 1.482(9)    yes
C64 . H641 . 0.929    no
C65 . F66 . 1.328(8)    yes
C65 . F67 . 1.332(9)    yes
C65 . F68 . 1.341(9)    yes
B69 . C70 . 1.638(8)    yes
B69 . C84 . 1.626(8)    yes
B69 . C98 . 1.642(9)    yes
C70 . C71 . 1.394(8)    yes
C70 . C75 . 1.396(8)    yes
C71 . C72 . 1.397(8)    yes
C71 . H711 . 0.938    no
C72 . C73 . 1.397(8)    yes
C72 . C80 . 1.479(8)    yes
C73 . C74 . 1.388(8)    yes
C73 . H731 . 0.931    no
C74 . C75 . 1.402(8)    yes
C74 . C76 . 1.484(8)    yes
C75 . H751 . 0.929    no
C76 . F77 . 1.336(8)    yes
C76 . F78 . 1.322(7)    yes
C76 . F79 . 1.361(8)    yes
C80 . F81 . 1.345(7)    yes
C80 . F82 . 1.331(7)    yes
C80 . F83 . 1.343(7)    yes
C84 . C85 . 1.401(8)    yes
C84 . C93 . 1.416(8)    yes
C85 . C86 . 1.387(8)    yes
C85 . H851 . 0.934    no
C86 . C87 . 1.493(9)    yes
C86 . C91 . 1.377(8)    yes
C87 . F88 . 1.338(8)    yes
C87 . F89 . 1.335(9)    yes
C87 . F90 . 1.325(8)    yes
C91 . C92 . 1.395(8)    yes
C91 . H911 . 0.924    no
C92 . C93 . 1.381(8)    yes
C92 . C94 . 1.490(7)    yes
C93 . H931 . 0.938    no
C94 . F600 . 1.354(5)    yes
C94 . F601 . 1.350(5)    yes
C94 . F602 . 1.351(5)    yes
C94 . F603 . 1.349(5)    yes
C94 . F604 . 1.360(5)    yes
C94 . F605 . 1.345(5)    yes
C98 . C99 . 1.396(8)    yes
C98 . C103 . 1.408(8)    yes
C99 . C100 . 1.382(8)    yes
C99 . H991 . 0.938    no
C100 . C101 . 1.401(8)    yes
C100 . C111 . 1.494(8)    yes
C101 . C102 . 1.385(8)    yes
C101 . H1011 . 0.934    no
C102 . C103 . 1.379(8)    yes
C102 . C104 . 1.502(6)    yes
C103 . H1031 . 0.934    no
C104 . F500 . 1.326(5)    yes
C104 . F501 . 1.327(5)    yes
C104 . F502 . 1.338(5)    yes
C104 . F503 . 1.332(5)    yes
C104 . F504 . 1.329(5)    yes
C104 . F505 . 1.325(5)    yes
C111 . F112 . 1.347(8)    yes
C111 . F113 . 1.342(8)    yes
C111 . F114 . 1.324(8)    yes
loop_
 _geom_angle_atom_site_label_1
 _geom_angle_site_symmetry_1
 _geom_angle_atom_site_label_2
 _geom_angle_site_symmetry_2
 _geom_angle_atom_site_label_3
 _geom_angle_site_symmetry_3
 _geom_angle
 _geom_angle_publ_flag
C2 . Ir1 . H11 . 86.2    no
C2 . Ir1 . H12 . 91.6    no
H11 . Ir1 . H12 . 83.8    no
C2 . Ir1 . C27 . 174.8(2)    yes
H11 . Ir1 . C27 . 89.2    no
H12 . Ir1 . C27 . 85.5    no
Ir1 . C2 . N3 . 110.4(4)    yes
Ir1 . C2 . N8 . 130.1(4)    yes
N3 . C2 . N8 . 118.7(5)    yes
C2 . N3 . C4 . 126.4(5)    yes
C2 . N3 . C18 . 113.3(5)    yes
C4 . N3 . C18 . 117.1(5)    yes
N3 . C4 . C5 . 111.7(5)    yes
N3 . C4 . H41 . 109.0    no
C5 . C4 . H41 . 109.1    no
N3 . C4 . H42 . 107.7    no
C5 . C4 . H42 . 109.2    no
H41 . C4 . H42 . 110.1    no
C4 . C5 . C6 . 111.1(5)    yes
C4 . C5 . H51 . 109.6    no
C6 . C5 . H51 . 109.9    no
C4 . C5 . H52 . 108.3    no
C6 . C5 . H52 . 109.0    no
H51 . C5 . H52 . 108.9    no
C5 . C6 . C7 . 113.2(6)    yes
C5 . C6 . H61 . 108.2    no
C7 . C6 . H61 . 108.5    no
C5 . C6 . H62 . 109.0    no
C7 . C6 . H62 . 108.1    no
H61 . C6 . H62 . 109.8    no
C6 . C7 . N8 . 113.1(5)    yes
C6 . C7 . H71 . 108.3    no
N8 . C7 . H71 . 107.4    no
C6 . C7 . H72 . 109.6    no
N8 . C7 . H72 . 108.6    no
H71 . C7 . H72 . 109.8    no
C7 . N8 . C2 . 128.1(5)    yes
C7 . N8 . C9 . 112.2(5)    yes
C2 . N8 . C9 . 119.6(5)    yes
N8 . C9 . C10 . 118.8(5)    yes
N8 . C9 . C16 . 119.5(6)    yes
C10 . C9 . C16 . 121.5(6)    yes
C9 . C10 . C11 . 121.8(6)    yes
C9 . C10 . C12 . 118.6(6)    yes
C11 . C10 . C12 . 119.6(6)    yes
C10 . C11 . H111 . 109.8    no
C10 . C11 . H112 . 110.3    no
H111 . C11 . H112 . 108.9    no
C10 . C11 . H113 . 109.9    no
H111 . C11 . H113 . 108.7    no
H112 . C11 . H113 . 109.1    no
C10 . C12 . C13 . 121.7(7)    yes
C10 . C12 . H121 . 119.1    no
C13 . C12 . H121 . 119.2    no
C12 . C13 . C14 . 120.2(8)    yes
C12 . C13 . C15 . 118.0(6)    yes
C14 . C13 . C15 . 121.8(8)    yes
C13 . C14 . H141 . 110.0    no
C13 . C14 . H142 . 109.0    no
H141 . C14 . H142 . 109.8    no
C13 . C14 . H143 . 109.4    no
H141 . C14 . H143 . 109.4    no
H142 . C14 . H143 . 109.2    no
C13 . C15 . C16 . 123.1(7)    yes
C13 . C15 . H151 . 119.1    no
C16 . C15 . H151 . 117.9    no
C9 . C16 . C15 . 117.1(7)    yes
C9 . C16 . C17 . 122.2(6)    yes
C15 . C16 . C17 . 120.7(6)    yes
C16 . C17 . H171 . 109.8    no
C16 . C17 . H172 . 109.8    no
H171 . C17 . H172 . 109.7    no
C16 . C17 . H173 . 109.2    no
H171 . C17 . H173 . 109.1    no
H172 . C17 . H173 . 109.2    no
N3 . C18 . C19 . 117.3(5)    yes
N3 . C18 . C24 . 120.4(5)    yes
C19 . C18 . C24 . 121.6(6)    yes
C18 . C19 . C20 . 122.2(6)    yes
C18 . C19 . C21 . 118.2(6)    yes
C20 . C19 . C21 . 119.6(6)    yes
C19 . C20 . H201 . 110.1    no
C19 . C20 . H202 . 109.8    no
H201 . C20 . H202 . 109.2    no
C19 . C20 . H203 . 110.0    no
H201 . C20 . H203 . 108.9    no
H202 . C20 . H203 . 108.9    no
C19 . C21 . C22 . 121.8(6)    yes
C19 . C21 . H211 . 119.0    no
C22 . C21 . H211 . 119.2    no
C21 . C22 . C23 . 118.4(6)    yes
C21 . C22 . C26 . 119.9(6)    yes
C23 . C22 . C26 . 121.7(6)    yes
C22 . C23 . C24 . 122.5(6)    yes
C22 . C23 . H231 . 118.9    no
C24 . C23 . H231 . 118.6    no
C23 . C24 . C18 . 117.5(6)    yes
C23 . C24 . C25 . 119.9(6)    yes
C18 . C24 . C25 . 122.4(6)    yes
C24 . C25 . H251 . 110.0    no
C24 . C25 . H252 . 109.5    no
H251 . C25 . H252 . 108.8    no
C24 . C25 . H253 . 110.3    no
H251 . C25 . H253 . 109.5    no
H252 . C25 . H253 . 108.8    no
C22 . C26 . H261 . 109.8    no
C22 . C26 . H262 . 110.2    no
H261 . C26 . H262 . 109.6    no
C22 . C26 . H263 . 109.8    no
H261 . C26 . H263 . 108.8    no
H262 . C26 . H263 . 108.7    no
Ir1 . C27 . N28 . 130.5(4)    yes
Ir1 . C27 . N42 . 111.8(4)    yes
N28 . C27 . N42 . 117.6(5)    yes
C27 . N28 . C29 . 121.4(5)    yes
C27 . N28 . C38 . 122.1(5)    yes
C29 . N28 . C38 . 115.4(5)    yes
N28 . C29 . C30 . 119.5(5)    yes
N28 . C29 . C36 . 118.7(6)    yes
C30 . C29 . C36 . 121.5(6)    yes
C29 . C30 . C31 . 121.7(6)    yes
C29 . C30 . C32 . 117.9(6)    yes
C31 . C30 . C32 . 120.4(6)    yes
C30 . C31 . H311 . 110.4    no
C30 . C31 . H312 . 109.2    no
H311 . C31 . H312 . 109.7    no
C30 . C31 . H313 . 109.2    no
H311 . C31 . H313 . 109.0    no
H312 . C31 . H313 . 109.3    no
C30 . C32 . C33 . 122.4(7)    yes
C30 . C32 . H321 . 118.8    no
C33 . C32 . H321 . 118.8    no
C32 . C33 . C34 . 121.8(7)    yes
C32 . C33 . C35 . 118.0(6)    yes
C34 . C33 . C35 . 120.2(7)    yes
C33 . C34 . H341 . 109.2    no
C33 . C34 . H342 . 109.5    no
H341 . C34 . H342 . 109.0    no
C33 . C34 . H343 . 110.3    no
H341 . C34 . H343 . 109.2    no
H342 . C34 . H343 . 109.6    no
C33 . C35 . C36 . 122.3(6)    yes
C33 . C35 . H351 . 118.8    no
C36 . C35 . H351 . 119.0    no
C29 . C36 . C35 . 117.9(6)    yes
C29 . C36 . C37 . 122.2(6)    yes
C35 . C36 . C37 . 119.8(6)    yes
C36 . C37 . H371 . 109.3    no
C36 . C37 . H372 . 110.1    no
H371 . C37 . H372 . 108.6    no
C36 . C37 . H373 . 111.1    no
H371 . C37 . H373 . 108.6    no
H372 . C37 . H373 . 109.1    no
N28 . C38 . C39 . 113.5(5)    yes
N28 . C38 . H381 . 108.8    no
C39 . C38 . H381 . 108.6    no
N28 . C38 . H382 . 107.8    no
C39 . C38 . H382 . 107.7    no
H381 . C38 . H382 . 110.3    no
C38 . C39 . C40 . 110.3(5)    yes
C38 . C39 . H391 . 108.4    no
C40 . C39 . H391 . 108.6    no
C38 . C39 . H392 . 110.1    no
C40 . C39 . H392 . 109.9    no
H391 . C39 . H392 . 109.4    no
C39 . C40 . C41 . 113.1(6)    yes
C39 . C40 . H401 . 108.8    no
C41 . C40 . H401 . 108.4    no
C39 . C40 . H402 . 108.4    no
C41 . C40 . H402 . 108.4    no
H401 . C40 . H402 . 109.6    no
C40 . C41 . N42 . 113.2(5)    yes
C40 . C41 . H411 . 108.5    no
N42 . C41 . H411 . 108.0    no
C40 . C41 . H412 . 109.4    no
N42 . C41 . H412 . 108.2    no
H411 . C41 . H412 . 109.5    no
C41 . N42 . C27 . 131.3(5)    yes
C41 . N42 . C43 . 116.1(5)    yes
C27 . N42 . C43 . 112.0(5)    yes
N42 . C43 . C44 . 117.9(5)    yes
N42 . C43 . C49 . 121.0(5)    yes
C44 . C43 . C49 . 120.5(6)    yes
C43 . C44 . C45 . 120.0(6)    yes
C43 . C44 . C46 . 118.7(6)    yes
C45 . C44 . C46 . 121.3(6)    yes
C44 . C45 . H451 . 110.2    no
C44 . C45 . H452 . 109.6    no
H451 . C45 . H452 . 109.6    no
C44 . C45 . H453 . 109.3    no
H451 . C45 . H453 . 109.1    no
H452 . C45 . H453 . 109.0    no
C44 . C46 . C47 . 121.8(6)    yes
C44 . C46 . H461 . 119.0    no
C47 . C46 . H461 . 119.1    no
C46 . C47 . C48 . 118.8(6)    yes
C46 . C47 . C51 . 119.8(7)    yes
C48 . C47 . C51 . 121.4(6)    yes
C47 . C48 . C49 . 122.2(6)    yes
C47 . C48 . H481 . 119.3    no
C49 . C48 . H481 . 118.5    no
C43 . C49 . C48 . 118.0(6)    yes
C43 . C49 . C50 . 122.9(6)    yes
C48 . C49 . C50 . 118.8(6)    yes
C49 . C50 . H501 . 109.3    no
C49 . C50 . H502 . 109.5    no
H501 . C50 . H502 . 109.6    no
C49 . C50 . H503 . 109.8    no
H501 . C50 . H503 . 108.9    no
H502 . C50 . H503 . 109.8    no
C47 . C51 . H511 . 110.3    no
C47 . C51 . H512 . 109.5    no
H511 . C51 . H512 . 108.7    no
C47 . C51 . H513 . 109.7    no
H511 . C51 . H513 . 109.0    no
H512 . C51 . H513 . 109.6    no
C59 . C54 . F400 . 116.2(5)    yes
C59 . C54 . F401 . 113.6(5)    yes
F400 . C54 . F401 . 105.97(6)    yes
C59 . C54 . F402 . 108.5(5)    yes
F400 . C54 . F402 . 105.94(6)    yes
F401 . C54 . F402 . 105.94(6)    yes
C59 . C54 . F403 . 108.4(6)    yes
C59 . C54 . F404 . 113.1(6)    yes
F403 . C54 . F404 . 105.95(6)    yes
C59 . C54 . F405 . 116.7(6)    yes
F403 . C54 . F405 . 105.96(6)    yes
F404 . C54 . F405 . 105.97(6)    yes
C54 . C59 . C60 . 120.7(6)    yes
C54 . C59 . C64 . 118.9(5)    yes
C60 . C59 . C64 . 120.4(6)    yes
C59 . C60 . C61 . 121.9(6)    yes
C59 . C60 . H601 . 118.9    no
C61 . C60 . H601 . 119.3    no
C60 . C61 . C62 . 116.0(5)    yes
C60 . C61 . B69 . 122.0(5)    yes
C62 . C61 . B69 . 121.9(5)    yes
C61 . C62 . C63 . 123.0(6)    yes
C61 . C62 . H621 . 118.6    no
C63 . C62 . H621 . 118.4    no
C62 . C63 . C64 . 120.0(6)    yes
C62 . C63 . C65 . 119.1(6)    yes
C64 . C63 . C65 . 120.9(6)    yes
C59 . C64 . C63 . 118.8(6)    yes
C59 . C64 . H641 . 120.7    no
C63 . C64 . H641 . 120.5    no
C63 . C65 . F66 . 114.1(6)    yes
C63 . C65 . F67 . 112.9(6)    yes
F66 . C65 . F67 . 106.7(6)    yes
C63 . C65 . F68 . 111.1(6)    yes
F66 . C65 . F68 . 105.0(6)    yes
F67 . C65 . F68 . 106.4(7)    yes
C61 . B69 . C70 . 104.6(5)    yes
C61 . B69 . C84 . 112.6(5)    yes
C70 . B69 . C84 . 114.4(5)    yes
C61 . B69 . C98 . 112.4(5)    yes
C70 . B69 . C98 . 111.9(5)    yes
C84 . B69 . C98 . 101.2(5)    yes
B69 . C70 . C71 . 121.5(5)    yes
B69 . C70 . C75 . 122.6(5)    yes
C71 . C70 . C75 . 115.7(5)    yes
C70 . C71 . C72 . 123.1(6)    yes
C70 . C71 . H711 . 118.8    no
C72 . C71 . H711 . 118.1    no
C71 . C72 . C73 . 119.9(5)    yes
C71 . C72 . C80 . 120.0(6)    yes
C73 . C72 . C80 . 120.0(5)    yes
C72 . C73 . C74 . 118.2(5)    yes
C72 . C73 . H731 . 121.2    no
C74 . C73 . H731 . 120.6    no
C73 . C74 . C75 . 120.7(6)    yes
C73 . C74 . C76 . 118.0(5)    yes
C75 . C74 . C76 . 121.2(6)    yes
C74 . C75 . C70 . 122.3(6)    yes
C74 . C75 . H751 . 118.2    no
C70 . C75 . H751 . 119.5    no
C74 . C76 . F77 . 113.6(6)    yes
C74 . C76 . F78 . 113.8(5)    yes
F77 . C76 . F78 . 106.4(5)    yes
C74 . C76 . F79 . 111.3(5)    yes
F77 . C76 . F79 . 104.7(5)    yes
F78 . C76 . F79 . 106.4(6)    yes
C72 . C80 . F81 . 112.8(5)    yes
C72 . C80 . F82 . 113.6(5)    yes
F81 . C80 . F82 . 106.1(5)    yes
C72 . C80 . F83 . 113.2(5)    yes
F81 . C80 . F83 . 104.1(5)    yes
F82 . C80 . F83 . 106.4(6)    yes
B69 . C84 . C85 . 125.1(5)    yes
B69 . C84 . C93 . 119.0(5)    yes
C85 . C84 . C93 . 115.3(5)    yes
C84 . C85 . C86 . 122.5(5)    yes
C84 . C85 . H851 . 119.0    no
C86 . C85 . H851 . 118.5    no
C85 . C86 . C87 . 119.1(6)    yes
C85 . C86 . C91 . 121.1(6)    yes
C87 . C86 . C91 . 119.7(6)    yes
C86 . C87 . F88 . 112.8(6)    yes
C86 . C87 . F89 . 112.6(6)    yes
F88 . C87 . F89 . 105.6(6)    yes
C86 . C87 . F90 . 113.1(6)    yes
F88 . C87 . F90 . 105.6(6)    yes
F89 . C87 . F90 . 106.5(7)    yes
C86 . C91 . C92 . 118.1(6)    yes
C86 . C91 . H911 . 121.4    no
C92 . C91 . H911 . 120.5    no
C91 . C92 . C93 . 120.9(6)    yes
C91 . C92 . C94 . 121.8(5)    yes
C93 . C92 . C94 . 117.3(5)    yes
C84 . C93 . C92 . 122.1(6)    yes
C84 . C93 . H931 . 118.9    no
C92 . C93 . H931 . 119.0    no
C92 . C94 . F600 . 112.4(5)    yes
C92 . C94 . F601 . 115.9(6)    yes
F600 . C94 . F601 . 105.91(6)    yes
C92 . C94 . F602 . 110.2(6)    yes
F600 . C94 . F602 . 105.86(6)    yes
F601 . C94 . F602 . 105.89(6)    yes
C92 . C94 . F603 . 113.9(6)    yes
C92 . C94 . F604 . 108.6(7)    yes
F603 . C94 . F604 . 105.88(6)    yes
C92 . C94 . F605 . 115.9(8)    yes
F603 . C94 . F605 . 105.90(6)    yes
F604 . C94 . F605 . 105.89(6)    yes
B69 . C98 . C99 . 120.8(5)    yes
B69 . C98 . C103 . 122.8(5)    yes
C99 . C98 . C103 . 115.6(5)    yes
C98 . C99 . C100 . 122.4(5)    yes
C98 . C99 . H991 . 118.7    no
C100 . C99 . H991 . 118.9    no
C99 . C100 . C101 . 120.8(5)    yes
C99 . C100 . C111 . 119.4(5)    yes
C101 . C100 . C111 . 119.8(6)    yes
C100 . C101 . C102 . 117.8(6)    yes
C100 . C101 . H1011 . 120.8    no
C102 . C101 . H1011 . 121.4    no
C101 . C102 . C103 . 121.0(5)    yes
C101 . C102 . C104 . 120.6(5)    yes
C103 . C102 . C104 . 118.4(5)    yes
C98 . C103 . C102 . 122.4(5)    yes
C98 . C103 . H1031 . 118.5    no
C102 . C103 . H1031 . 119.0    no
C102 . C104 . F500 . 112.4(6)    yes
C102 . C104 . F501 . 115.6(6)    yes
F500 . C104 . F501 . 106.37(6)    yes
C102 . C104 . F502 . 109.2(6)    yes
F500 . C104 . F502 . 106.36(6)    yes
F501 . C104 . F502 . 106.36(6)    yes
C102 . C104 . F503 . 112.2(4)    yes
C102 . C104 . F504 . 111.1(4)    yes
F503 . C104 . F504 . 106.35(6)    yes
C102 . C104 . F505 . 114.0(4)    yes
F503 . C104 . F505 . 106.35(6)    yes
F504 . C104 . F505 . 106.38(6)    yes
C100 . C111 . F112 . 111.9(6)    yes
C100 . C111 . F113 . 113.4(6)    yes
F112 . C111 . F113 . 106.8(6)    yes
C100 . C111 . F114 . 112.2(5)    yes
F112 . C111 . F114 . 105.1(6)    yes
F113 . C111 . F114 . 106.9(6)    yes


_iucr_refine_instruction_details_constraints
;
#
# Punched on 23/08/12 at 10:29:21
#
#LIST     12                                                                    
BLOCK SCALE X'S, U'S 
EQUIV PART(1001,OCC) PART(1002,OCC) 
WEIGHT -1 PART(1002,OCC) 
EQUIV PART(2001,OCC) PART(2002,OCC) 
WEIGHT -1 PART(2002,OCC) 
EQUIV PART(3001,OCC) PART(3002,OCC) 
WEIGHT -1 PART(3002,OCC) 
RIDE IR  (   1,X'S) H   (  11,X'S) H   (  12,X'S) 
RIDE C   (   4,X'S) H   (  42,X'S) H   (  41,X'S) 
RIDE C   (   5,X'S) H   (  52,X'S) H   (  51,X'S) 
RIDE C   (   6,X'S) H   (  61,X'S) H   (  62,X'S) 
RIDE C   (   7,X'S) H   (  72,X'S) H   (  71,X'S) 
RIDE C   (  11,X'S) H   ( 112,X'S) H   ( 111,X'S) H   ( 113,X'S) 
RIDE C   (  12,X'S) H   ( 121,X'S) 
RIDE C   (  14,X'S) H   ( 142,X'S) H   ( 141,X'S) H   ( 143,X'S) 
RIDE C   (  15,X'S) H   ( 151,X'S) 
RIDE C   (  17,X'S) H   ( 172,X'S) H   ( 171,X'S) H   ( 173,X'S) 
RIDE C   (  20,X'S) H   ( 203,X'S) H   ( 201,X'S) H   ( 202,X'S) 
RIDE C   (  21,X'S) H   ( 211,X'S) 
RIDE C   (  23,X'S) H   ( 231,X'S) 
RIDE C   (  25,X'S) H   ( 251,X'S) H   ( 253,X'S) H   ( 252,X'S) 
RIDE C   (  26,X'S) H   ( 261,X'S) H   ( 262,X'S) H   ( 263,X'S) 
RIDE C   (  31,X'S) H   ( 312,X'S) H   ( 313,X'S) H   ( 311,X'S) 
RIDE C   (  32,X'S) H   ( 321,X'S) 
RIDE C   (  34,X'S) H   ( 341,X'S) H   ( 343,X'S) H   ( 342,X'S) 
RIDE C   (  35,X'S) H   ( 351,X'S) 
RIDE C   (  37,X'S) H   ( 371,X'S) H   ( 372,X'S) H   ( 373,X'S) 
RIDE C   (  38,X'S) H   ( 382,X'S) H   ( 381,X'S) 
RIDE C   (  39,X'S) H   ( 392,X'S) H   ( 391,X'S) 
RIDE C   (  40,X'S) H   ( 401,X'S) H   ( 402,X'S) 
RIDE C   (  41,X'S) H   ( 412,X'S) H   ( 411,X'S) 
RIDE C   (  45,X'S) H   ( 451,X'S) H   ( 452,X'S) H   ( 453,X'S) 
RIDE C   (  46,X'S) H   ( 461,X'S) 
RIDE C   (  48,X'S) H   ( 481,X'S) 
RIDE C   (  50,X'S) H   ( 501,X'S) H   ( 502,X'S) H   ( 503,X'S) 
RIDE C   (  51,X'S) H   ( 512,X'S) H   ( 513,X'S) H   ( 511,X'S) 
RIDE C   (  60,X'S) H   ( 601,X'S) 
RIDE C   (  62,X'S) H   ( 621,X'S) 
RIDE C   (  64,X'S) H   ( 641,X'S) 
RIDE C   (  71,X'S) H   ( 711,X'S) 
RIDE C   (  73,X'S) H   ( 731,X'S) 
RIDE C   (  75,X'S) H   ( 751,X'S) 
RIDE C   (  85,X'S) H   ( 851,X'S) 
RIDE C   (  91,X'S) H   ( 911,X'S) 
RIDE C   (  93,X'S) H   ( 931,X'S) 
RIDE C   (  99,X'S) H   ( 991,X'S) 
RIDE C   ( 101,X'S) H   (1011,X'S) 
RIDE C   ( 103,X'S) H   (1031,X'S) 
END                                                                             
;


_iucr_refine_instruction_details_restraints
;
#
# Punched on 23/08/12 at 10:29:21
#
#LIST     16                                                                    
SAME C(54) F(400) F(401) F(402) AND 
CONT C(54) F(401) F(402) F(400) AND 
CONT C(54) F(402) F(400) F(401) AND 
CONT C(54) F(403) F(404) F(405) AND 
CONT C(54) F(404) F(405) F(403) AND 
CONT C(54) F(405) F(403) F(404) 
SIMU 0.01 C(54) F(400) F(401) F(402) AND 
CONT C(54) F(401) F(402) F(400) AND 
CONT C(54) F(402) F(400) F(401) AND 
CONT C(54) F(403) F(404) F(405) AND 
CONT C(54) F(404) F(405) F(403) AND 
CONT C(54) F(405) F(403) F(404) 
DELU 0.01 C(54) F(400) F(401) F(402) AND 
CONT C(54) F(401) F(402) F(400) AND 
CONT C(54) F(402) F(400) F(401) AND 
CONT C(54) F(403) F(404) F(405) AND 
CONT C(54) F(404) F(405) F(403) AND 
CONT C(54) F(405) F(403) F(404) 
SAME C(104) F(500) F(501) F(502) AND 
CONT C(104) F(501) F(502) F(500) AND 
CONT C(104) F(502) F(500) F(501) AND 
CONT C(104) F(503) F(504) F(505) AND 
CONT C(104) F(504) F(505) F(503) AND 
CONT C(104) F(505) F(503) F(504) 
SIMU 0.01 C(104) F(500) F(501) F(502) AND 
CONT C(104) F(501) F(502) F(500) AND 
CONT C(104) F(502) F(500) F(501) AND 
CONT C(104) F(503) F(504) F(505) AND 
CONT C(104) F(504) F(505) F(503) AND 
CONT C(104) F(505) F(503) F(504) 
DELU 0.01 C(104) F(500) F(501) F(502) AND 
CONT C(104) F(501) F(502) F(500) AND 
CONT C(104) F(502) F(500) F(501) AND 
CONT C(104) F(503) F(504) F(505) AND 
CONT C(104) F(504) F(505) F(503) AND 
CONT C(104) F(505) F(503) F(504) 
SAME C(94) F(600) F(601) F(602) AND 
CONT C(94) F(601) F(602) F(600) AND 
CONT C(94) F(602) F(600) F(601) AND 
CONT C(94) F(603) F(604) F(605) AND 
CONT C(94) F(604) F(605) F(603) AND 
CONT C(94) F(605) F(603) F(604) 
SIMU 0.01  C(94) F(600) F(601) F(602) AND 
CONT C(94) F(601) F(602) F(600) AND 
CONT C(94) F(602) F(600) F(601) AND 
CONT C(94) F(603) F(604) F(605) AND 
CONT C(94) F(604) F(605) F(603) AND 
CONT C(94) F(605) F(603) F(604) 
DELU 0.01 C(94) F(600) F(601) F(602) AND 
CONT C(94) F(601) F(602) F(600) AND 
CONT C(94) F(602) F(600) F(601) AND 
CONT C(94) F(603) F(604) F(605) AND 
CONT C(94) F(604) F(605) F(603) AND 
CONT C(94) F(605) F(603) F(604) 
REM   HREST   START (DO NOT REMOVE THIS LINE) 
REM   HREST   END (DO NOT REMOVE THIS LINE) 
END                                                                             
;
